# Supplementary material for: Prenatal Exposure to Arsenic and Cadmium Impacts Infectious Disease-Related Genes within the Glucocorticoid Receptor Signal Transduction Pathway
Source: MDPI journal article supplement (doi:10.3390/ijms151222374), 2014-12-03
Supplement: s3 [file s3]

## Sheet: TableS1
Supplementary Information
Table S1. Database of 1085 infectious disease genes (IDGs). The major infectious disease KEGG pathway categories are listed. Genes with SNPs associated with infectious disease susceptibility, as identified by Hill (2001) 1, are designated with an "X".
IDG	KEGG Pathway Category	Genes with SNPs Associated with Infectious Disease Susceptibility 1
ABL1	bacterial
ACE	parasitic
ACTB	viral, bacterial
ACTG1	viral, bacterial
ACTN1	parasitic
ACTN2	parasitic
ACTN3	parasitic
ACTN4	parasitic
ADAM10	bacterial
ADAM17	bacterial
ADAR	viral
ADCY1	viral, parasitic
ADCY2	viral
ADCY3	viral, bacterial
ADCY4	viral
ADCY5	viral
ADCY6	viral
ADCY7	viral
ADCY8	viral
ADCY9	viral, bacterial
AGFG1	viral
AKAP8L	viral
AKT1	viral, bacterial, parasitic
AKT2	viral, bacterial, parasitic
AKT3	viral, bacterial, parasitic
ALOX5	parasitic
ALYREF	viral
ANAPC1	viral
ANAPC10	viral
ANAPC11	viral
ANAPC2	viral
ANAPC4	viral
ANAPC5	viral
ANAPC7	viral
APAF1	viral, bacterial
APC	viral
APC2	viral
APOA1	parasitic
APOL1	parasitic
ARAF	viral
ARF1	bacterial
ARG1	parasitic
ARG2	parasitic
ARHGAP10	bacterial
ARHGEF12	bacterial
ARHGEF2	bacterial
ARHGEF26	bacterial
ARNTL	viral
ARPC1A	bacterial
ARPC1B	bacterial
ARPC2	bacterial
ARPC3	bacterial
ARPC4	bacterial
ARPC5	bacterial
ARPC5L	bacterial
ATF1	viral
ATF2	viral
ATF3	viral
ATF4	viral
ATF6B	viral
ATG5	bacterial
ATM	viral
ATP6AP1	viral, bacterial
ATP6V0A1	bacterial
ATP6V0A2	bacterial
ATP6V0A4	bacterial
ATP6V0B	bacterial
ATP6V0C	bacterial
ATP6V0D1	bacterial
ATP6V0D2	bacterial
ATP6V0E1	bacterial
ATP6V0E2	bacterial
ATP6V1A	bacterial
ATP6V1B1	bacterial
ATP6V1B2	bacterial
ATP6V1C1	bacterial
ATP6V1C2	bacterial
ATP6V1D	bacterial
ATP6V1E1	bacterial
ATP6V1E2	bacterial
ATP6V1F	bacterial
ATP6V1G1	bacterial
ATP6V1G2	bacterial
ATP6V1G3	bacterial
ATP6V1H	bacterial
ATR	viral
BAD	viral, bacterial, parasitic
BAX	viral, bacterial
BBC3	viral
BCAR1	bacterial
BCL10	bacterial
BCL2	viral, bacterial, parasitic
BCL2L1	viral, parasitic
BCL2L13	bacterial
BCL2L2-PABPN1	viral
BDKRB2	parasitic
BID	bacterial
BIRC2	parasitic
BIRC3	parasitic
BIRC5	viral
BIRC7	parasitic
BIRC8	parasitic
BNIP3	bacterial
BRAF	viral
BTRC	bacterial
BUB1B	viral
BUB3	viral
C1QA	bacterial, parasitic
C1QB	bacterial, parasitic
C1QBP	viral
C1QC	bacterial, parasitic
C1R	bacterial
C1S	bacterial
C2	bacterial
C3	viral, bacterial, parasitic
C3AR1	bacterial
C4A	bacterial
C4B	bacterial
C4BPA	bacterial
C4BPB	bacterial
C5	viral, bacterial
C5AR1	bacterial
C8A	parasitic
C8B	parasitic
C8G	parasitic
C9	parasitic
CALM1	bacterial
CALM2	bacterial
CALM3	bacterial
CALML3	bacterial
CALML5	bacterial
CALML6	bacterial
CALR	viral, parasitic
CAMK2A	bacterial
CAMK2B	bacterial
CAMK2D	bacterial
CAMK2G	bacterial
CAMP	bacterial
CANX	viral
CARD9	bacterial
CASP1	viral, bacterial
CASP10	viral, bacterial
CASP12	viral
CASP3	viral, bacterial, parasitic
CASP7	bacterial
CASP8	viral, bacterial, parasitic
CASP9	viral, bacterial, parasitic
CAV1	bacterial
CAV2	bacterial
CAV3	bacterial
CBL	bacterial
CBLB	viral, bacterial
CBLC	bacterial
CCL2	viral, parasitic
CCL3	bacterial, parasitic
CCL3L1	bacterial, parasitic
CCL3L3	bacterial, parasitic
CCL4	bacterial
CCL4L1	bacterial
CCL4L2	bacterial
CCL5	viral, bacterial, parasitic
CCNA1	viral
CCNA2	viral
CCNB2	viral
CCND1	viral
CCND2	viral
CCND3	viral
CCNE1	viral
CCNE2	viral
CCR5	parasitic	X
CD14	bacterial, parasitic
CD19	viral
CD1D	parasitic
CD209	viral, bacterial
CD247	parasitic
CD28	viral
CD2AP	bacterial
CD36	parasitic
CD38	viral
CD3D	viral, parasitic
CD3E	viral, parasitic
CD3G	viral, parasitic
CD40	viral, parasitic
CD40LG	parasitic
CD44	viral, bacterial
CD46	viral
CD58	viral
CD74	viral, bacterial
CD81	viral, parasitic
CDC16	viral
CDC20	viral
CDC23	viral
CDC26	viral
CDC27	viral
CDC34	viral
CDC42	bacterial
CDH1	bacterial
CDK1	viral
CDK2	viral
CDK4	viral
CDK6	viral
CDKN1A	viral
CDKN1B	viral
CDKN2A	viral
CDKN2B	viral
CDKN2C	viral
CEBPB	bacterial
CEBPG	bacterial
CFB	bacterial
CFD	bacterial
CFH	bacterial
CFI	bacterial
CFL1	bacterial
CFL2	bacterial
CFLAR	parasitic
CFP	viral
CFTR	bacterial
CHEK1	viral
CHEK2	viral
CHUK	viral, bacterial, parasitic
CIITA	viral, bacterial, parasitic
CLDN1	viral, bacterial
CLDN10	viral
CLDN11	viral
CLDN14	viral
CLDN15	viral
CLDN16	viral
CLDN17	viral
CLDN18	viral
CLDN19	viral
CLDN2	viral
CLDN20	viral
CLDN22	viral
CLDN23	viral
CLDN24	viral
CLDN25	viral
CLDN3	viral
CLDN4	viral
CLDN5	viral
CLDN6	viral
CLDN7	viral
CLDN8	viral
CLDN9	viral
CLEC4E	bacterial
CLEC4M	viral, bacterial
CLEC7A	bacterial
CLK1	bacterial
CLOCK	viral
CLTA	bacterial
CLTB	bacterial
CLTC	bacterial
CLTCL1	bacterial
COL11A1	parasitic
COL11A2	parasitic
COL1A1	parasitic
COL1A2	parasitic
COL24A1	parasitic
COL27A1	parasitic
COL2A1	parasitic
COL3A1	parasitic
COL4A1	parasitic
COL4A2	parasitic
COL4A3	parasitic
COL4A4	parasitic
COL4A5	parasitic
COL4A6	parasitic
COL5A1	parasitic
COL5A2	parasitic
COL5A3	parasitic
COMP	parasitic
CORO1A	bacterial
CPSF4	viral
CR1	bacterial, parasitic
CR2	viral
CREB1	viral, bacterial
CREB3	viral
CREB3L1	viral
CREB3L2	viral
CREB3L3	viral
CREB3L4	viral
CREB5	viral
CREBBP	viral, bacterial
CREM	viral
CRK	bacterial
CRKL	bacterial
CRTC1	viral
CRTC2	viral
CRTC3	viral
CSF2	viral, bacterial, parasitic
CSF3	parasitic
CSK	bacterial
CSNK2A1	viral
CSNK2A2	viral
CSNK2B	viral
CTNNA1	bacterial
CTNNA2	bacterial
CTNNA3	bacterial
CTNNB1	viral, bacterial
CTSD	bacterial
CTSG	parasitic
CTSS	bacterial
CTTN	bacterial
CUL1	viral
CXCL1	bacterial, parasitic
CXCL10	viral
CXCL2	bacterial
CXCL3	bacterial
CXCL5	bacterial
CXCL6	bacterial
CXCR1	bacterial
CXCR2	bacterial
CYBA	parasitic
CYCS	viral, bacterial, parasitic
CYP27B1	bacterial
DARC	parasitic	X
DAXX	viral
DDB1	viral
DDB2	viral
DDX39B	viral
DDX3X	viral
DDX58	viral
DIAPH1	bacterial
DLG1	viral
DNAJB1	viral
DNAJC3	viral
DNM1	bacterial
DNM2	bacterial
DNM3	bacterial
DOCK1	bacterial
DOK1	viral
DSG1	bacterial
DVL1	viral
DVL2	viral
DVL3	viral
DYNC1H1	bacterial
DYNC1I1	bacterial
DYNC1I2	bacterial
DYNC1LI1	bacterial
DYNC1LI2	bacterial
DYNC2H1	bacterial
E2F1	viral
E2F2	viral
E2F3	viral
EEA1	bacterial
EEF1A1	bacterial
EEF1A2	bacterial
EEF1D	viral
EEF1G	bacterial
EGF	viral
EGFR	viral, bacterial
EGR1	viral
EGR2	viral
EGR3	viral
EIF2AK1	viral
EIF2AK2	viral
EIF2AK3	viral
EIF2AK4	viral
EIF2S1	viral
EIF3E	viral
EIF3H	viral
ELK1	viral, parasitic
ELK4	viral
ELMO1	bacterial
ENTPD1	viral
ENTPD3	viral
ENTPD8	viral
EP300	viral, bacterial
ERO1L	bacterial
ETS1	viral
ETS2	viral
EZR	bacterial
F11R	bacterial
F2RL1	parasitic
FADD	viral, bacterial, parasitic
FAS	viral, parasitic
FASLG	viral, parasitic
FBXW11	bacterial
FCAR	bacterial
FCER1G	bacterial
FCER2	viral
FCGR1A	bacterial, parasitic
FCGR2A	bacterial, parasitic
FCGR2B	viral, bacterial
FCGR2C	bacterial, parasitic
FCGR3A	bacterial, parasitic
FCGR3B	bacterial, parasitic
FDPS	viral
FGG	bacterial
FGR	viral
FLNA	bacterial
FLNB	bacterial
FLNC	bacterial
FN1	bacterial, parasitic
FOS	viral, bacterial, parasitic
FOSL1	viral
FPR1	bacterial
FPR2	bacterial
FPR3	bacterial
FURIN	viral
FYN	viral, bacterial
FZD1	viral
FZD10	viral
FZD2	viral
FZD3	viral
FZD4	viral
FZD5	viral
FZD6	viral
FZD7	viral
FZD8	viral
FZD9	viral
GAB1	bacterial
GIT1	bacterial
GLTSCR2	viral
GNA11	parasitic
GNA14	parasitic
GNA15	parasitic
GNAI1	bacterial, parasitic
GNAI2	bacterial, parasitic
GNAI3	bacterial, parasitic
GNAL	parasitic
GNAO1	parasitic
GNAQ	parasitic
GNAS	bacterial, parasitic
GNB2L1	viral
GPS2	viral
GRB2	viral
GSK3B	viral
GTF2B	viral
GTF2E1	viral
GTF2E2	viral
GTF2I	viral
GTF2IRD1	viral
GYPA	parasitic
GYPB	parasitic
GYPC	parasitic
HBA1	parasitic
HBA2	parasitic
HBB	parasitic	X
HBEGF	bacterial
HBS1L	bacterial
HCFC1	viral
HCFC2	viral
HCLS1	bacterial
HDAC1	viral
HDAC2	viral
HDAC4	viral
HDAC5	viral
HGF	parasitic
HLA-A	viral	X
HLA-B	viral	X
HLA-C	viral	X
HLA-DMA	viral, bacterial, parasitic
HLA-DMB	viral, bacterial, parasitic
HLA-DOA	viral, bacterial, parasitic
HLA-DOB	viral, bacterial, parasitic
HLA-DPA1	viral, bacterial, parasitic
HLA-DPB1	viral, bacterial, parasitic
HLA-DQA1	viral, bacterial, parasitic
HLA-DQA2	viral, bacterial, parasitic
HLA-DQB1	viral, bacterial, parasitic	X
HLA-DRA	viral, bacterial, parasitic
HLA-DRB1	viral, bacterial, parasitic	X
HLA-DRB3	viral, bacterial, parasitic
HLA-DRB4	viral, bacterial, parasitic
HLA-DRB5	viral, bacterial, parasitic
HLA-E	viral
HLA-F	viral
HLA-G	viral
HMGN1	viral
HNRNPK	viral
HNRNPUL1	viral
HPR	parasitic
HRAS	viral
HSF1	bacterial
HSPA1A	viral, bacterial, parasitic
HSPA1B	viral, bacterial, parasitic
HSPA1L	viral, bacterial, parasitic
HSPA2	viral, bacterial, parasitic
HSPA6	viral, bacterial, parasitic
HSPA8	viral, bacterial, parasitic
HSPA9	bacterial
HSPB1	viral, parasitic
HSPB2	viral
HSPD1	bacterial
HSPG2	viral
ICAM1	viral, bacterial, parasitic
IDO1	parasitic
IDO2	parasitic
IFIH1	viral
IFIT1	viral
IFIT1B	viral
IFNA1	viral, bacterial
IFNA10	viral, bacterial
IFNA13	viral, bacterial
IFNA14	viral, bacterial
IFNA16	viral, bacterial
IFNA17	viral, bacterial
IFNA2	viral, bacterial
IFNA21	viral, bacterial
IFNA4	viral, bacterial
IFNA5	viral, bacterial
IFNA6	viral, bacterial
IFNA7	viral, bacterial
IFNA8	viral, bacterial
IFNAR1	viral
IFNAR2	viral
IFNB1	viral, bacterial, parasitic
IFNG	viral, bacterial, parasitic
IFNGR1	viral, bacterial, parasitic	X
IFNGR2	viral, bacterial, parasitic
IGSF5	bacterial
IKBKB	viral, bacterial, parasitic
IKBKE	viral
IKBKG	viral, bacterial, parasitic
IL10	viral, bacterial, parasitic	X
IL10RA	viral, bacterial, parasitic
IL10RB	viral, bacterial, parasitic
IL12A	viral, bacterial, parasitic
IL12B	viral, bacterial, parasitic
IL13	viral
IL15	viral
IL15RA	viral
IL18	viral, bacterial, parasitic
IL1A	viral, bacterial, parasitic
IL1B	viral, bacterial, parasitic	X
IL1R1	viral, parasitic
IL1R2	viral, parasitic
IL2	viral, parasitic
IL23A	bacterial
IL2RA	viral
IL2RB	viral
IL2RG	viral
IL33	viral
IL4	viral, parasitic	X
IL6	viral, bacterial, parasitic
IL8	viral, bacterial, parasitic
ILK	bacterial
IRAK1	viral, bacterial, parasitic
IRAK2	bacterial
IRAK4	viral, bacterial, parasitic
IRF1	viral, bacterial
IRF3	viral, bacterial
IRF7	viral
IRF8	bacterial
IRF9	viral
IRGM	parasitic
ITGA4	parasitic
ITGA5	bacterial
ITGA6	parasitic
ITGAL	viral, bacterial, parasitic
ITGAM	bacterial, parasitic
ITGAX	bacterial
ITGB1	bacterial, parasitic
ITGB2	viral, bacterial, parasitic
IVNS1ABP	viral
JAK1	viral, bacterial, parasitic
JAK2	viral, bacterial, parasitic
JAK3	viral
JAM2	bacterial
JAM3	bacterial
JUN	viral, bacterial, parasitic
KAT2A	viral
KAT2B	viral
KAT5	viral
KCNQ1	bacterial
KDELR1	bacterial
KDELR2	bacterial
KDELR3	bacterial
KLC1	bacterial
KLC2	bacterial
KLC3	bacterial
KLC4	bacterial
KLRB1	parasitic
KLRC4-KLRK1	parasitic
KLRK1	parasitic
KPNA1	viral
KPNA2	viral
KRAS	viral
KRT10	bacterial
KRT18	bacterial
KSR1	bacterial
LAMA1	parasitic
LAMA2	parasitic
LAMA3	parasitic
LAMA4	parasitic
LAMA5	parasitic
LAMB1	parasitic
LAMB2	parasitic
LAMB3	parasitic
LAMB4	parasitic
LAMC1	parasitic
LAMC2	parasitic
LAMC3	parasitic
LAMP1	bacterial
LAMP2	bacterial
LAMTOR5	viral
LBP	bacterial
LCK	viral
LDLR	viral, parasitic
LRP1	parasitic
LSP1	bacterial
LTA	viral
LTBR	viral
LY96	bacterial, parasitic
LYN	viral, bacterial
MAD2L1	viral
MAD2L2	bacterial
MALT1	bacterial
MAP2K1	viral
MAP2K2	viral
MAP2K3	viral, parasitic
MAP2K4	viral, bacterial, parasitic
MAP2K6	viral, parasitic
MAP2K7	viral
MAP3K1	viral
MAP3K14	viral, bacterial
MAP3K3	viral
MAP3K7	viral, parasitic
MAPK1	viral, bacterial, parasitic
MAPK10	viral, bacterial, parasitic
MAPK11	viral, bacterial, parasitic
MAPK12	viral, bacterial, parasitic
MAPK13	viral, bacterial, parasitic
MAPK14	viral, bacterial, parasitic
MAPK3	viral, bacterial, parasitic
MAPK8	viral, bacterial, parasitic
MAPK9	viral, bacterial, parasitic
MARCKSL1	parasitic
MASP1	bacterial
MASP2	bacterial
MAVS	viral
MBL2	bacterial	X
MCRS1	viral
MDM2	viral
MED8	viral
MET	bacterial, parasitic
MMP9	viral
MRAS	viral
MRC1	bacterial
MRC2	bacterial
MSN	viral
MSX1	viral
MSX2	viral
MUC2	bacterial, parasitic
MX1	viral
MYB	viral
MYBL1	viral
MYBL2	viral
MYC	viral
MYD88	viral, bacterial, parasitic
MYH10	bacterial
MYH14	bacterial
MYH9	bacterial
NAIP	bacterial
NCF1	parasitic
NCF2	parasitic
NCF4	parasitic
NCK1	bacterial
NCK2	bacterial
NCL	bacterial
NCOR2	viral
NEDD4	viral
NFATC1	viral
NFATC2	viral
NFATC3	viral
NFATC4	viral
NFKB1	viral, bacterial, parasitic
NFKB2	viral, bacterial
NFKBIA	viral, bacterial, parasitic
NFKBIB	viral, bacterial, parasitic
NFKBIE	viral
NFYA	bacterial
NFYB	viral, bacterial
NFYC	bacterial
NLRC4	bacterial
NLRP3	viral, bacterial
NLRX1	viral
NOD1	bacterial
NOD2	bacterial
NOS2	bacterial, parasitic
NR1H3	viral
NRAS	viral
NRP1	viral
NUP214	viral
NUP98	viral
NXF1	viral
NXF2	viral
NXF2B	viral
NXF3	viral
NXF5	viral
NXT1	viral
NXT2	viral
OAS1	viral
OAS2	viral
OAS3	viral
OCLN	viral, bacterial
PABPN1	viral
PABPN1L	viral
PAK1	bacterial
PCNA	viral
PDGFA	viral
PDGFB	viral
PDGFRA	viral
PDGFRB	viral
PDIA4	bacterial
PDPK1	viral, parasitic
PECAM1	parasitic
PER1	viral
PER2	viral
PER3	viral
PFN1	bacterial
PFN2	bacterial
PFN3	bacterial
PFN4	bacterial
PIAS1	viral
PIK3C3	bacterial
PIK3CA	viral, bacterial, parasitic
PIK3CB	viral, bacterial, parasitic
PIK3CD	viral, bacterial, parasitic
PIK3CG	viral, bacterial, parasitic
PIK3R1	viral, bacterial, parasitic
PIK3R2	viral, bacterial, parasitic
PIK3R3	viral, bacterial, parasitic
PIK3R5	viral, bacterial, parasitic
PILRA	viral
PKN1	bacterial
PKN2	bacterial
PKN3	bacterial
PLA2R1	bacterial
PLCB1	parasitic
PLCB2	parasitic
PLCB3	parasitic
PLCB4	parasitic
PLCG1	viral, bacterial
PLCG2	viral, bacterial
PLEKHM2	bacterial
PLG	viral, bacterial
PLK3	bacterial
PML	viral
POLB	viral
POLD1	viral
POLD2	viral
POLD3	viral
POLD4	viral
POLE	viral
POLE2	viral
POLE3	viral
POLE4	viral
POLR1C	viral
POLR1D	viral
POLR2A	viral
POLR2B	viral
POLR2C	viral
POLR2D	viral
POLR2E	viral
POLR2F	viral
POLR2G	viral
POLR2H	viral
POLR2I	viral
POLR2J	viral
POLR2J2	viral
POLR2J3	viral
POLR2K	viral
POLR2L	viral
POLR3A	viral
POLR3B	viral
POLR3C	viral
POLR3D	viral
POLR3E	viral
POLR3F	viral
POLR3G	viral
POLR3GL	viral
POLR3H	viral
POLR3K	viral
POU2F3	viral
PPARA	viral
PPIF	parasitic
PPP1CA	viral
PPP1CB	viral
PPP1CC	viral
PPP2CA	viral, parasitic
PPP2CB	viral, parasitic
PPP2R1A	viral, parasitic
PPP2R1B	viral, parasitic
PPP2R2A	viral, parasitic
PPP2R2B	viral, parasitic
PPP2R2C	viral, parasitic
PPP2R2D	viral, parasitic
PPP3CA	viral, bacterial
PPP3CB	viral, bacterial
PPP3CC	viral, bacterial
PPP3R1	viral, bacterial
PPP3R2	viral, bacterial
PRKACA	viral, bacterial, parasitic
PRKACB	viral, bacterial, parasitic
PRKACG	viral, bacterial, parasitic
PRKCA	viral, bacterial, parasitic
PRKCB	viral, bacterial, parasitic
PRKCG	viral, bacterial, parasitic
PRKCQ	viral
PRKX	viral, bacterial, parasitic
PRSS1	viral
PRSS2	viral
PRSS3	viral
PSMC1	viral
PSMC2	viral
PSMC3	viral
PSMC4	viral
PSMC5	viral
PSMC6	viral
PSMD1	viral
PSMD11	viral
PSMD12	viral
PSMD13	viral
PSMD14	viral
PSMD2	viral
PSMD3	viral
PSMD4	viral
PSMD6	viral
PSMD7	viral
PSMD8	viral
PSME3	viral
PTAFR	bacterial
PTEN	viral
PTGS2	parasitic
PTK2	bacterial, parasitic
PTK2B	viral
PTMA	viral
PTPN11	viral, bacterial
PTPN6	parasitic
PTPRZ1	bacterial
PTTG1	viral
PTTG2	viral
PVRL1	viral
PVRL2	viral
PXN	bacterial
PYCARD	viral, bacterial
RAB1A	bacterial
RAB1B	bacterial
RAB5A	bacterial, parasitic
RAB5B	bacterial, parasitic
RAB5C	bacterial, parasitic
RAB7A	bacterial, parasitic
RAB7B	bacterial, parasitic
RAB9A	viral
RAB9B	viral
RAC1	bacterial
RAE1	viral
RAF1	viral, bacterial
RAN	viral
RANBP1	viral
RANBP3	viral
RB1	viral
RBPJ	viral
RBPJL	viral
RCHY1	viral
RELA	viral, bacterial, parasitic
RELB	viral
RFX5	bacterial
RFXANK	bacterial
RFXAP	bacterial
RHOA	bacterial
RHOG	bacterial
RILP	bacterial
RIPK1	viral
RIPK2	bacterial
RNASEL	viral
ROCK1	bacterial
ROCK2	bacterial
RRAS	viral
RRAS2	viral
RSAD2	viral
RXRA	viral
SAR1A	bacterial
SAR1B	bacterial
SCARB1	viral
SDC1	parasitic
SDC2	parasitic
SEC22B	bacterial
SEC61A1	bacterial
SEC61A2	bacterial
SEC61B	bacterial
SEC61G	bacterial
SELE	parasitic
SELP	bacterial, parasitic
SELPLG	bacterial
SERPINB1	parasitic
SERPINB10	parasitic
SERPINB13	parasitic
SERPINB2	parasitic
SERPINB3	parasitic
SERPINB4	parasitic
SERPINB6	parasitic
SERPINB9	parasitic
SERPINE1	parasitic
SERPING1	bacterial
SFTPA1	bacterial
SFTPA2	bacterial
SH2D1A	viral
SHC1	bacterial
SHC2	bacterial
SHC3	bacterial
SHC4	bacterial
SHFM1	viral
SKP1	viral
SKP2	viral
SLAMF1	viral
SLC12A2	bacterial
SLC25A31	viral
SLC25A4	viral
SLC25A5	viral
SLC25A6	viral
SLC2A1	viral
SMAD2	viral, parasitic
SMAD3	viral, parasitic
SMAD4	viral
SND1	viral
SNW1	viral
SOCS1	parasitic
SOCS3	viral
SOS1	viral
SOS2	viral
SP100	viral
SPHK1	bacterial
SPHK2	bacterial
SPI1	viral
SPN	viral
SRC	viral, bacterial
SRF	viral
SRPK1	viral
SRSF1	viral
SRSF2	viral
SRSF3	viral
SRSF4	viral
SRSF5	viral
SRSF6	viral
SRSF7	viral
SRSF8	viral
SRSF9	viral
STAT1	viral, bacterial, parasitic
STAT2	viral
STAT3	viral, parasitic
STAT4	viral
STAT5A	viral
STAT5B	viral
STAT6	viral
SYK	viral, bacterial
TAB1	viral, parasitic
TAB2	viral, parasitic
TACR1	viral
TAF10	viral
TAF13	viral
TAF3	viral
TAF4	viral
TAF4B	viral
TAF5	viral
TAF5L	viral
TAF6	viral
TAF6L	viral
TAF9B	viral
TAP1	viral
TAP2	viral
TBK1	viral
TBP	viral
TBPL1	viral
TBPL2	viral
TCF3	viral
TCIRG1	bacterial
TERT	viral
TGFB1	viral, bacterial, parasitic
TGFB2	viral, bacterial, parasitic
TGFB3	viral, bacterial, parasitic
TGFBR1	viral, parasitic
TGFBR2	viral, parasitic
THBS1	parasitic
THBS2	parasitic
THBS3	parasitic
THBS4	parasitic
THOP1	parasitic
TICAM1	viral, bacterial, parasitic
TICAM2	viral, bacterial
TIRAP	viral, bacterial
TJP1	bacterial
TJP2	bacterial
TLN1	viral
TLN2	viral
TLR1	bacterial
TLR2	viral, bacterial, parasitic
TLR3	viral
TLR4	viral, bacterial, parasitic
TLR5	bacterial
TLR6	bacterial, parasitic
TLR7	viral
TLR9	viral, bacterial, parasitic
TMPRSS13	viral
TMPRSS2	viral
TMPRSS4	viral
TNF	viral, bacterial, parasitic	X
TNFAIP3	viral
TNFRSF10A	viral
TNFRSF10B	viral
TNFRSF10C	viral
TNFRSF10D	viral
TNFRSF13C	viral
TNFRSF14	viral
TNFRSF1A	viral, bacterial, parasitic
TNFSF10	viral
TNFSF14	viral
TP53	viral
TP53INP1	viral
TP73	viral
TRADD	viral, bacterial
TRAF1	viral
TRAF2	viral
TRAF3	viral
TRAF5	viral
TRAF6	viral, bacterial, parasitic
TRIM25	viral
TRRAP	viral
TSPO	viral
TUBA1A	bacterial
TUBA1B	bacterial
TUBA1C	bacterial
TUBA3C	bacterial
TUBA3D	bacterial
TUBA3E	bacterial
TUBA4A	bacterial
TUBA8	bacterial
TUBAL3	bacterial
TUBB	bacterial
TUBB1	bacterial
TUBB2A	bacterial
TUBB2B	bacterial
TUBB3	bacterial
TUBB4A	bacterial
TUBB4B	bacterial
TUBB6	bacterial
TUBB8	bacterial
TYK2	viral, parasitic
U2AF1	bacterial
UBE2D2	bacterial
UBE2R2	viral
USP7	viral
VAC14	viral
VCAM1	viral, parasitic
VCL	bacterial, parasitic
VCP	bacterial
VDAC1	viral
VDAC2	viral
VDAC3	viral
VDR	bacterial	X
VIM	viral
WAS	bacterial
WASF1	bacterial
WASF2	bacterial
WASL	bacterial,
WNT1	viral
WNT10A	viral
WNT10B	viral
WNT11	viral
WNT16	viral
WNT2	viral
WNT2B	viral
WNT3	viral
WNT3A	viral
WNT4	viral
WNT5A	viral
WNT5B	viral
WNT6	viral
WNT7A	viral
WNT7B	viral
WNT8A	viral
WNT8B	viral
WNT9A	viral
WNT9B	viral
XBP1	viral
XIAP	viral, parasitic
XPO1	viral
YWHAB	viral
YWHAE	viral
YWHAG	viral
YWHAH	viral
YWHAQ	viral, bacterial
YWHAZ	viral, bacterial
ZFP36	viral
1 Genes with SNPS associated with infectious disease retrieved from: Hill AV: The genomics and genetics of human infectious disease susceptibility. Annu Rev Genomics Hum Genet 2001, 2:373-400.

## Sheet: TableS2
Table S2. Database of 950 exposure responsive genes (ERGs). The publication sources used to identify each ERG are listed.
ERG	Source 1
ABCB9	(Sanders 2014)
ABCD1	(Rager 2014)
ACAA1	(Rager 2014)
ACOT4	(Sanders 2014)
ACSL3	(Fry 2007)
ACTN4	(Fry 2007)
ACTR2	(Fry 2007)
ACTR3	(Fry 2007)
ACVR1B	(Bailey 2014)
ACVR2A	(Bailey 2014)
ACVR2B	(Bailey 2014)
ADAM8	(Rager 2014)
ADAMTS7	(Rager 2014)
ADAMTS8	(Kippler 2013)
ADM	(Fry 2007)
ADORA3	(Fry 2007)
ADRB3	(Rager 2014)
AGPAT2	(Sanders 2014)
AGTPBP1	(Fry 2007)
AHNAK	(Rager 2014)
AIRE	(Kippler 2013)
AK094488	(Sanders 2014)
AKTIP	(Rager 2014)
AMFR	(Fry 2007)
AMPD2	(Fry 2007)
ANGPT-1	(Bailey 2014)
ANO1	(Sanders 2014)
ANP32A	(Fry 2007)
APBB3	(Kippler 2013)
APPBP2	(Rager 2014)
AREG	(Fry 2007)
ARHGAP23	(Rager 2014), (Rojas 2014)
ARHGAP26	(Fry 2007)
ARHGAP9	(Rager 2014)
ARHGEF40	(Rager 2014)
ARID1B	(Fry 2007)
ARID5A	(Fry 2007)
ARL5B	(Fry 2007)
ARL7	(Fry 2007)
ARMCX3	(Rager 2014)
ARPC1B	(Rager 2014)
ARRB1	(Rager 2014)
ARTN	(Bailey 2014)
ASAH1	(Fry 2007)
ATF7IP2	(Fry 2007)
ATHL1	(Sanders 2014)
ATP2B1	(Fry 2007)
AQP9	(Fei 2013)
AXUD1	(Fry 2007)
AZIN1	(Fry 2007)
B3GNT5	(Fry 2007)
B4GALT1	(Fry 2007)
BCAT1	(Rager 2014)
BCCIP	(Kippler 2013)
BCL2A1	(Fry 2007)
BCL2L11	(Fry 2007)
BCL3	(Fry 2007)
BCL6	(Fry 2007)
BCLAF1	(Fry 2007)
BEST1	(Rager 2014)
BID	(Sanders 2014)
BIK	(Bailey 2014)
BIRC3	(Fry 2007)
BMP2	(Bailey 2014)
BMP3B	(Bailey 2014)
BMPR1A	(Bailey 2014)
BMPR2	(Bailey 2014)
BRE	(Fry 2007)
BRI3BP	(Rager 2014), (Rojas 2014)
BRWD1	(Fry 2007)
BRWD2	(Fry 2007)
BTBD14A	(Fry 2007)
BTBD2	(Rager 2014)
BTG1	(Fry 2007)
BTG2	(Fry 2007)
BTNL8	(Fry 2007)
C13ORF25	(Fry 2007)
C14ORF133	(Rager 2014)
C14ORF156	(Fry 2007)
C14ORF32	(Fry 2007)
C14ORF4	(Sanders 2014)
C14ORF92	(Fry 2007)
C19	(Kippler 2013)
C1ORF38	(Rager 2014)
C1ORF63	(Fry 2007)
C20ORF32	(Fry 2007)
C20ORF74	(Fry 2007)
C22ORF39	(Rager 2014)
C2ORF48	(Rager 2014)
C2ORF57	(Rager 2014)
C3ORF23	(Kippler 2013)
C3ORF45	(Rager 2014)
C4B	(Kippler 2013)
C4ORF39	(Sanders 2014)
C5R1	(Fry 2007)
C6ORF85	(Fry 2007)
C9ORF72	(Fry 2007)
CACNA2D3	(Kippler 2013)
CALML4	(Rager 2014)
CAMK1D	(Rager 2014)
CAMK2G	(Rager 2014)
CAMTA1	(Kippler 2013)
CAPN5	(Rager 2014), (Rojas 2014)
CARD8	(Fry 2007)
CASC2	(Kippler 2013)
CASP9	(Sanders 2014)
CBX4	(Fry 2007)
CCDC106	(Rager 2014), (Rojas 2014)
CCDC142	(Rager 2014)
CCDC66	(Sanders 2014)
CCL14	(Bailey 2014)
CCL19	(Bailey 2014)
CCL20	(Fry 2007)
CCL21	(Bailey 2014)
CCL24	(Bailey 2014)
CCL28	(Bailey 2014)
CCL3	(Fry 2007)
CCL4	(Fry 2007)
CCNI	(Rager 2014), (Sanders 2014)
CCNL1	(Fry 2007)
CCR1	(Bailey 2014)
CCR2	(Fry 2007), (Bailey 2014)
CCR3	(Fry 2007), (Bailey 2014)
CCR4	(Bailey 2014)
CCR6	(Bailey 2014)
CCR8	(Bailey 2014)
CCRL2	(Fry 2007)
CCSAP	(Rager 2014)
CD14	(Fry 2007)
CD177	(Fry 2007)
CD27 / TNFRSF7	(Bailey 2014)
CD44	(Fry 2007)
CD58	(Fry 2007)
CD69	(Fry 2007)
CD70	(Kippler 2013)
CD80	(Bailey 2014)
CD83	(Fry 2007)
CDC42EP3	(Fry 2007)
CDCA7L	(Fry 2007)
CDH17	(Kippler 2013)
CDH22	(Rager 2014)
CDKN1A	(Fry 2007)
CDKN2A	(Kile 2012)
CDS2	(Rager 2014)
CEBPB	(Fry 2007)
CENTD1	(Fry 2007)
CER1	(Bailey 2014)
CERK	(Rager 2014), (Rojas 2014)
CFC1	(Bailey 2014)
CGI-09	(Fry 2007)
CHCHD4	(Rager 2014), (Rojas 2014)
CHCHD5	(Rager 2014)
CHD1	(Fry 2007)
CHEK2	(Rager 2014)
CHIC2	(Rager 2014)
CHSY1	(Fry 2007)
CHTF18	(Rager 2014)
CIAS1	(Fry 2007)
CIRBP	(Fry 2007)
CKAP4	(Fry 2007)
CLCNKB	(Rager 2014)
CLEC7A	(Fry 2007)
CNIH4	(Fry 2007)
CNOT2	(Sanders 2014)
COBRA1	(Rager 2014), (Rojas 2014)
COG4	(Rager 2014)
COX4I1	(Fry 2007)
COX6C	(Fry 2007)
COX7B	(Fry 2007)
CPEB4	(Fry 2007)
CPSF7	(Rager 2014)
CR590505	(Sanders 2014)
CREG2	(Rager 2014)
CREM	(Fry 2007)
CRHR2	(Rager 2014), (Rojas 2014)
CRIM1	(Bailey 2014)
CRIP3	(Rager 2014)
CRLF2	(Bailey 2014)
CSNK1A1	(Fry 2007)
CSNK1D	(Fry 2007), (Rager 2014), (Rojas 2014), (Sanders 2014)
CTGF	(Bailey 2014)
CTLA4	(Bailey 2014)
CTRB1	(Rager 2014)
CUL3	(Fry 2007)
CXCL1	(Fry 2007), (Bailey 2014)
CXCL12	(Kippler 2013)
CXCL16	(Fry 2007), (Rager 2014), (Bailey 2014)
CXCL9	(Bailey 2014)
CXCR3	(Bailey 2014)
CXCR4	(Fry 2007), (Bailey 2014)
CXCR5	(Bailey 2014)
CXOR57	(Sanders 2014)
CXORF38	(Rager 2014)
CXORF40A	(Rager 2014)
CYTH4	(Rager 2014)
D2HGDH	(Rager 2014), (Rojas 2014)
DAB2IP	(Rager 2014)
DAF	(Fry 2007)
DCC	(Kippler 2013)
DCLK1	(Sanders 2014)
DCTN6	(Fry 2007)
DDIT4	(Fry 2007)
DDX21	(Fry 2007)
DDX24	(Sanders 2014)
DDX41	(Rager 2014)
DEFB4	(Bailey 2014)
DENND4B	(Rager 2014)
DENND5A	(Rager 2014)
DHTKD1	(Rager 2014)
DIP2B	(Rager 2014)
DKFZP434H132	(Fry 2007)
DKFZP761P0212	(Rager 2014)
DKKL1	(Bailey 2014)
DLK1	(Bailey 2014)
DNAJB9	(Fry 2007)
DNAJC6	(Fry 2007)
DNM2	(Rager 2014)
DUSP1	(Fry 2007)
DUSP2	(Fry 2007)
DUSP5	(Fry 2007)
EBF	(Fry 2007)
EBI2	(Fry 2007)
ECGF1	(Fry 2007)
EDA2R	(Bailey 2014)
EDAR	(Bailey 2014)
EDG1	(Bailey 2014)
EFCAB11	(Rager 2014)
EFHC2	(Rager 2014)
EFHD2	(Rager 2014)
EFNA1	(Rager 2014)
EGR1	(Fry 2007)
EHD1	(Fry 2007)
EIF4A1	(Fry 2007)
EIF4G3	(Fry 2007)
EIF5	(Fry 2007)
ELF2	(Fry 2007)
ELL2	(Fry 2007)
EMB	(Fry 2007)
EML2	(Bailey 2014)
ENC1	(Fry 2007)
EPB41	(Fry 2007)
ERBB4	(Bailey 2014)
ERBP	(Fry 2007)
EREG	(Fry 2007), (Bailey 2014)
ESM1	(Bailey 2014)
ESR1	(Koestler 2013)
ETF1	(Fry 2007)
ETS2	(Fry 2007)
ETV1	(Sanders 2014)
EVL	(Fry 2007)
EXT1	(Fry 2007)
F2	(Rager 2014)
F3/TF	(Bailey 2014)
FAM115C	(Rager 2014)
FAM11B	(Fry 2007)
FAM134A	(Rager 2014)
FAM138C	(Rager 2014)
FAM226B	(Rager 2014)
FAM63A	(Rager 2014)
FAM84B	(Rager 2014)
FAM86B1	(Rager 2014)
FAN1	(Rager 2014)
FBLN2	(Rager 2014), (Rojas 2014)
FBXO11	(Fry 2007)
FBXO32	(Rager 2014), (Rojas 2014)
FBXO33	(Fry 2007)
FCAR	(Fry 2007)
FCGRT	(Rager 2014)
FGF11	(Bailey 2014)
FGF12	(Bailey 2014)
FGF16	(Bailey 2014)
FGF17	(Bailey 2014)
FGF19	(Bailey 2014)
FGF-23	(Bailey 2014)
FGF6	(Bailey 2014)
FICD	(Kippler 2013)
FLJ10211	(Fry 2007)
FLJ11000	(Fry 2007)
FLJ14107	(Rager 2014)
FLJ20291	(Fry 2007)
FLJ20464	(Rager 2014)
FLJ20701	(Fry 2007)
FLJ21369	(Rager 2014)
FLJ22028	(Fry 2007)
FLJ22184	(Rager 2014)
FLJ22313	(Fry 2007)
FLJ33641	(Fry 2007)
FLJ34208	(Fry 2007)
FLJ34969	(Fry 2007)
FLJ36031	(Fry 2007)
FLJ40288	(Rager 2014)
FMO4	(Rager 2014)
FNBP1	(Fry 2007)
FOS	(Fry 2007)
FOSB	(Fry 2007)
FOSL2	(Fry 2007)
FOXH1	(Rager 2014)
FOXO3A	(Fry 2007)
FRY-AS1	(Rager 2014)
FTH1	(Fry 2007), (Rager 2014)
FTHL17	(Rager 2014)
FUBP1	(Fry 2007)
FUNDC1	(Rager 2014)
FXR1	(Kippler 2013)
FYB	(Fry 2007)
FYN	(Fry 2007)
G0S2	(Fry 2007)
G3BP2	(Fry 2007)
GABARAPL1	(Fry 2007)
GADD45B	(Fry 2007)
GAK	(Rager 2014), (Rojas 2014)
GALR2	(Rager 2014)
GAP43	(Kippler 2013)
GDF8	(Bailey 2014)
GDPD1	(Kippler 2013)
GFRA1	(Bailey 2014)
GIMAP1	(Fry 2007)
GIMAP8	(Fry 2007)
GLE1	(Rager 2014), (Rojas 2014)
GLI2	(Rager 2014), (Rojas 2014)
GLT28D1	(Fry 2007)
GLTP	(Sanders 2014)
GNA15	(Fry 2007)
GNG2	(Fry 2007)
GPR123	(Kippler 2013)
GPR155	(Rager 2014), (Rojas 2014)
GPR44	(Bailey 2014)
GPR65	(Fry 2007)
GPR68	(Rager 2014)
GPR84	(Fry 2007)
GPRIN3	(Rager 2014), (Rojas 2014)
GPX3	(Fry 2007)
GPX6	(Rager 2014)
GRP	(Rager 2014)
GSPT1	(Fry 2007)
GTF2A1	(Kippler 2013)
H3F3B	(Fry 2007)
HAPLN3	(Rager 2014)
HAX1	(Sanders 2014)
HBBP1	(Fry 2007)
HBEGF	(Fry 2007)
HBG1	(Rager 2014)
HCG27	(Fry 2007), (Rager 2014), (Rojas 2014)
HCG4	(Rager 2014)
HCV2/BMPER	(Bailey 2014)
HDAC4	(Rager 2014), (Rojas 2014), (Kippler 2013)
HEATR2	(Rager 2014)
HECTD1	(Fry 2007)
HELT	(Rager 2014)
HIF1A	(Fry 2007)
HIST1H2B	(Sanders 2014)
HIST1H4L	(Kippler 2013)
HLA-DPA1	(Fry 2007)
HLA-DQA1	(Fry 2007)
HMGCL	(Rager 2014)
HNRPDL	(Fry 2007)
HOXB4	(Rager 2014), (Rojas 2014)
HOXC12	(Kippler 2013)
HPRG	(Bailey 2014)
HPX	(Rager 2014)
HRASLS2	(Kippler 2013)
HRG	(Bailey 2014)
HS1BP3	(Rager 2014)
HSH2D	(Rager 2014)
IAH1	(Rager 2014)
IBRDC2	(Fry 2007)
ICAM1	(Fry 2007)
ICAM5	(Bailey 2014)
ID3	(Fry 2007)
IDI1	(Fry 2007)
IER2	(Fry 2007)
IER3	(Fry 2007)
IER5	(Fry 2007)
IFFO2	(Rager 2014)
IFI35	(Rager 2014)
IFNAR2	(Bailey 2014)
IFNG	(Ahmed 2011)
IFNGR1	(Fry 2007)
IFRD1	(Fry 2007)
IGF1R	(Rager 2014), (Rojas 2014)
IGHV7-81	(Rager 2014)
IGJ	(Fry 2007)
IL17RD	(Kippler 2013)
IL1B	(Fry 2007)
IL1F10	(Bailey 2014)
IL1R2	(Fry 2007)
IL1RAP	(Bailey 2014)
IL1RN	(Fry 2007)
IL28B	(Rager 2014)
IL7R	(Bailey 2014)
IL8	(Fry 2007), (Ahmed 2011)
ILF2	(Sanders 2014)
ILVBL	(Rager 2014)
INHBA	(Bailey 2014)
INHBB	(Bailey 2014)
INHBC	(Bailey 2014)
INSIG1	(Fry 2007)
INSR	(Bailey 2014)
IQCG	(Rager 2014)
IRAK3	(Fry 2007)
IRF2BP2	(Fry 2007)
IRS2	(Fry 2007)
ISYNA1	(Rager 2014)
ITGA5	(Rager 2014)
ITIH4	(Rager 2014)
ITPR2	(Fry 2007)
JAKMIP2-AS1	(Rager 2014)
JMJD1C	(Fry 2007)
JUN	(Fry 2007)
JUNB	(Fry 2007)
KCNE3	(Fry 2007)
KCNQ1	(Rager 2014), (Rojas 2014)
KDM5B-AS1	(Rager 2014)
KDM6B	(Rager 2014)
KIAA0040	(Rager 2014)
KIAA0063	(Fry 2007)
KIAA0146	(Fry 2007)
KIAA0426	(Sanders 2014)
KIAA0513	(Rager 2014)
KIAA0804	(Fry 2007)
KIAA0863	(Fry 2007)
KIAA0922	(Fry 2007)
KIAA1128	(Fry 2007)
KIAA1530	(Fry 2007)
KIAA1618	(Fry 2007)
KIAA1718	(Fry 2007)
KIAA1754	(Fry 2007)
KIF21B	(Rager 2014)
KLF10	(Fry 2007)
KLF11	(Fry 2007)
KLF16	(Sanders 2014)
KLF2	(Fry 2007)
KLF4	(Fry 2007)
KLHL28	(Rager 2014)
KLHL29	(Kippler 2013)
KRT34	(Rager 2014)
L1TD1	(Sanders 2014)
LAMB1	(Kippler 2013)
LDLR	(Fry 2007)
LDOC1	(Rager 2014)
LEPREL1-AS1	(Rager 2014)
LEPROTL1	(Fry 2007)
LIFR	(Bailey 2014)
LILRA5	(Fry 2007)
LIMK2	(Fry 2007)
LINC00265	(Rager 2014)
LINC00339	(Rager 2014)
LINS1	(Fry 2007)
LIPE	(Rager 2014)
LOC100128164	(Rager 2014)
LOC100131608	(Rager 2014)
LOC100132858	(Rager 2014)
LOC100506190	(Rager 2014)
LOC100507092	(Rager 2014)
LOC100507144	(Rager 2014)
LOC100507386	(Rager 2014)
LOC100507419	(Rager 2014)
LOC100507424	(Rager 2014)
LOC100507495	(Rager 2014)
LOC145474	(Fry 2007)
LOC146517	(Fry 2007)
LOC149478	(Fry 2007)
LOC153684	(Fry 2007)
LOC200230	(Fry 2007)
LOC203274	(Fry 2007)
LOC254559	(Rager 2014)
LOC283701	(Rager 2014)
LOC284630	(Rager 2014)
LOC285513	(Fry 2007)
LOC285857	(Rager 2014)
LOC285958	(Fry 2007)
LOC338758	(Fry 2007)
LOC374443	(Fry 2007)
LOC390660	(Rager 2014)
LOC400050	(Fry 2007)
LOC400410	(Fry 2007)
LOC401394	(Fry 2007)
LOC441434	(Fry 2007)
LOC646329	(Rager 2014)
LOC728763	(Rager 2014)
LOC729032	(Rager 2014)
LOC729737	(Rager 2014)
LOC90499	(Rager 2014)
LPAR2	(Rager 2014)
LRFN3	(Rager 2014)
LRRC26	(Broberg 2014)
LRRC50	(Fry 2007)
LRWD1	(Kippler 2013)
LTB	(Bailey 2014)
LYZ	(Fry 2007)
MAEL	(Sanders 2014)
MAFB	(Fry 2007)
MAFF	(Fry 2007)
MAGI3	(Rager 2014)
MALAT1	(Rager 2014), (Rojas 2014)
MAN2C1	(Fry 2007)
MAP3K11	(Rager 2014)
MAP3K3	(Rager 2014)
MAP3K8	(Fry 2007)
MATK	(Kippler 2013)
MBNL2	(Fry 2007), (Rager 2014)
MDC1	(Rager 2014), (Rojas 2014)
MED16	(Rager 2014), (Rojas 2014)
MEGF8	(Sanders 2014)
METRNL	(Fry 2007)
MEX3B	(Rager 2014)
MFAP3	(Rager 2014)
MFGE8	(Bailey 2014)
MFRP	(Bailey 2014)
MFSD6L	(Rager 2014)
MGC14126	(Fry 2007)
MGC14376	(Fry 2007)
MGC26885	(Fry 2007)
MGC5370	(Fry 2007)
MGC7036	(Fry 2007)
MID1IP1	(Rager 2014), (Rojas 2014)
MIF	(Bailey 2014)
MIR1237	(Rager 2014)
MIR1238	(Rager 2014)
MIR124-1	(Rager 2014)
MIR1538	(Rager 2014)
MIR155	(Rager 2014)
MIR22HG	(Rager 2014)
MIR2467	(Rager 2014)
MIR302D	(Rager 2014)
MIR30A	(Rager 2014)
MIR3135B	(Rager 2014)
MIR320E	(Rager 2014)
MIR3676	(Rager 2014)
MIR4292	(Rager 2014)
MIR4297	(Rager 2014)
MIR4441	(Rager 2014)
MIR4732	(Rager 2014)
MIR553	(Rager 2014)
MIR595	(Rager 2014)
MIR604	(Rager 2014)
MLL2	(Sanders 2014)
MLLT3	(Fry 2007)
MLR2	(Fry 2007)
MMP25	(Rager 2014)
MPI	(Rager 2014)
MRPL10	(Sanders 2014)
MRPL47	(Fry 2007)
MSL1	(Rager 2014), (Rojas 2014)
MSX2P1	(Rager 2014)
MT1F	(Rager 2014)
MT1X	(Fry 2007)
MT2A	(Fry 2007)
MTIF2	(Sanders 2014)
MUC22	(Rager 2014)
MXD1	(Fry 2007)
MYL10	(Rager 2014)
MYLIP	(Fry 2007)
MYO1H	(Kippler 2013)
MYOD1	(Rager 2014)
MYOM2	(Fry 2007)
MYPN	(Kippler 2013)
NAA10	(Kippler 2013)
NAA16	(Rager 2014)
NAA60	(Rager 2014)
NBL1	(Bailey 2014)
NCAM-1	(Bailey 2014)
NDUFA4	(Fry 2007)
NEGR1-AS1	(Rager 2014)
NEUROD1	(Bailey 2014)
NFATC1	(Rager 2014), (Rojas 2014)
NFIL3	(Fry 2007)
NFKB1	(Fry 2007)
NFKBIA	(Fry 2007), (Rager 2014)
NFKBIZ	(Fry 2007)
NID1	(Bailey 2014)
NIPBL	(Fry 2007)
NLRP1	(Sanders 2014)
NMES1	(Fry 2007)
NMT1	(Sanders 2014)
NODAL	(Kippler 2013)
NOV	(Bailey 2014)
NPW	(Rager 2014)
NQO2	(Rager 2014)
NR1H2	(Sanders 2014)
NR4A1	(Fry 2007)
NR4A2	(Fry 2007)
NRCAM	(Bailey 2014)
NRG1	(Bailey 2014)
NRG2	(Bailey 2014)
NRG3	(Bailey 2014)
NRIP1	(Fry 2007)
NRP2	(Bailey 2014)
NRTN	(Bailey 2014)
NSMAF	(Fry 2007)
NTF3	(Bailey 2014)
NUDT16P1	(Rager 2014)
NUPL1	(Fry 2007)
NXT1	(Fry 2007)
OLIG1	(Fry 2007)
OPN1MW	(Rager 2014)
OR2T10	(Rager 2014)
OSBPL2	(Rager 2014)
OSM	(Fry 2007)
OTOG	(Rager 2014)
OX/HCRT	(Bailey 2014)
PAG1	(Fry 2007)
PAPOLA	(Fry 2007)
PASK	(Fry 2007)
PAX9	(Kippler 2013)
PBEF1	(Fry 2007)
PBX1	(Fry 2007)
PCED1B-AS1	(Rager 2014)
PCIF1	(Rager 2014)
PCMTD1	(Rager 2014)
PCYT1B	(Fry 2007)
PDE4A	(Fry 2007)
PDE4B	(Fry 2007)
PDE4D	(Fry 2007)
PDE6G	(Rager 2014)
PDGFC	(Bailey 2014)
PDGFD	(Bailey 2014)
PDPN	(Rager 2014)
PDZD7	(Rager 2014)
PECAM-1	(Bailey 2014)
PELI1	(Fry 2007)
PER1	(Fry 2007)
PEX11B	(Rager 2014)
PF4	(Bailey 2014)
PFKFB3	(Fry 2007)
PGAM2	(Rager 2014)
PGAP2	(Rager 2014), (Rojas 2014)
PGK1	(Fry 2007)
PHACTR1	(Fry 2007)
PHF12	(Rager 2014)
PHLDB3	(Sanders 2014)
PICALM	(Fry 2007)
PIK3R1	(Fry 2007)
PIM3	(Fry 2007)
PIP4K2C	(Rager 2014)
PKNOX1	(Rager 2014)
PLA2G15	(Rager 2014)
PLAUR	(Fry 2007)
PLCG2	(Kippler 2013)
PLD5	(Sanders 2014)
PLEK	(Fry 2007)
PLEKHG3	(Rager 2014), (Rojas 2014)
PLEKHM2	(Sanders 2014)
PLGLA	(Rager 2014)
PLIN5	(Broberg 2014)
PLK3	(Fry 2007)
PLSCR1	(Fry 2007)
PLUNC/BPIFA1	(Bailey 2014)
PMAIP1	(Fry 2007)
PNPLA4	(Rager 2014)
POLDIP3	(Rager 2014)
POLE3	(Rager 2014)
POLR2E	(Kippler 2013)
PORCN	(Rager 2014)
PPARGC1A	(Koestler 2013)
PPHLN1	(Fry 2007)
PPM1A	(Fry 2007)
PPP1CB	(Fry 2007)
PPP1R18	(Rager 2014)
PPP2R5C	(Fry 2007)
PPP3R1	(Fry 2007)
PPP4R1	(Rager 2014)
PPTC7	(Rager 2014), (Rojas 2014)
PQLC1	(Fry 2007)
PRADC1	(Rager 2014)
PRAME	(Sanders 2014)
PRDM11	(Fry 2007)
PREX1	(Rager 2014)
PRG1	(Fry 2007)
PRKD2	(Rager 2014)
PRO0149	(Fry 2007)
PRR13	(Sanders 2014)
PRRT1	(Rager 2014), (Rojas 2014)
PSMB7	(Sanders 2014)
PSPC1	(Rager 2014)
PSPC1	(Fry 2007)
PSPN	(Bailey 2014)
PTDSR	(Fry 2007)
PTGES2	(Rager 2014), (Rojas 2014)
PTGS2	(Fry 2007)
PTMA	(Fry 2007)
PTP4A1	(Fry 2007)
PTPRE	(Rager 2014), (Rojas 2014)
PTPRN2	(Kippler 2013)
PTTG1	(Kippler 2013)
PTX3	(Bailey 2014)
PXN	(Rager 2014)
PXN-AS1	(Rager 2014)
QPCTL	(Rager 2014)
RAB20	(Fry 2007)
RAB23	(Kippler 2013)
RAB37	(Rager 2014), (Rojas 2014)
RAB43	(Rager 2014)
RABIF	(Rager 2014)
RAD23B	(Fry 2007)
RAET1G	(Kippler 2013)
RASGRP4	(Rager 2014)
RASL10A	(Rager 2014)
RBAF600	(Fry 2007)
RBBP9	(Rager 2014)
RBM12	(Fry 2007)
RBM16	(Fry 2007)
RBM3	(Fry 2007)
RBM33	(Fry 2007), (Kippler 2013)
RCE1	(Rager 2014)
RCSD1	(Fry 2007)
RER1	(Rager 2014)
RERE	(Rager 2014), (Rojas 2014)
REV3L	(Fry 2007)
RFK	(Rager 2014)
RFP2	(Fry 2007)
RFX4	(Sanders 2014)
RGR	(Fry 2007)
RGS1	(Fry 2007)
RGS18	(Fry 2007)
RIOK2	(Sanders 2014)
RIPK2	(Fry 2007)
RN5S330	(Rager 2014)
RNF12	(Fry 2007)
RNF139	(Fry 2007)
RNF149	(Fry 2007)
RNF213	(Rager 2014), (Rojas 2014)
RNF26	(Rager 2014)
RNF34	(Fry 2007)
RNF44	(Rager 2014), (Rojas 2014)
RNU47	(Fry 2007)
RPA2	(Rager 2014)
RPL10	(Fry 2007)
RPL22L1	(Fry 2007)
RPL3	(Rager 2014), (Rojas 2014)
RPL30	(Sanders 2014)
RPS6KA2	(Broberg 2014)
RSPH10B	(Sanders 2014)
RUFY1	(Sanders 2014)
RUNX1T1	(Kippler 2013)
RYBP	(Fry 2007)
S100A12	(Bailey 2014)
S1PR4	(Rager 2014)
SAMD9L	(Fry 2007)
SAMSN1	(Fry 2007)
SAR1A	(Fry 2007)
SAT	(Fry 2007)
SBDS	(Fry 2007)
SBNO2	(Rager 2014), (Rojas 2014)
SCAP2	(Fry 2007)
SCN1B	(Sanders 2014)
SCO2	(Fry 2007)
SDC3	(Sanders 2014)
SEC62-AS1	(Rager 2014)
SEPT2	(Fry 2007)
SERPINB1	(Fry 2007)
SERPINB9	(Fry 2007)
SERPINI1	(Fry 2007)
SESN2	(Fry 2007)
SESTD1	(Fry 2007)
SFN	(Fry 2007)
SFRP3/FRZB	(Bailey 2014)
SFRP4	(Bailey 2014)
SFRS10	(Fry 2007)
SFRS15	(Fry 2007)
SFRS3	(Fry 2007)
SFRS4	(Fry 2007)
SFRS5	(Fry 2007)
SGK	(Fry 2007)
SH2B2	(Rager 2014), (Rojas 2014)
SH3TC1	(Fry 2007)
SIN3A	(Rager 2014)
SKIL	(Fry 2007)
SKIV2L	(Rager 2014), (Rojas 2014)
SKP1A	(Fry 2007)
SLA	(Fry 2007)
SLC12A9	(Rager 2014)
SLC16A1	(Fry 2007)
SLC16A6	(Fry 2007)
SLC18A2	(Fry 2007)
SLC25A19	(Rager 2014), (Rojas 2014)
SLC25A44	(Rager 2014)
SLC2A3	(Fry 2007)
SLC35C1	(Rager 2014)
SLC45A4	(Rager 2014), (Rojas 2014), (Kippler 2013)
SMAD 1	(Bailey 2014)
SMAD 5	(Bailey 2014)
SMAD 9	(Bailey 2014)
SMAP1L	(Fry 2007)
SMARCA2	(Fry 2007)
SMOC2	(Kippler 2013)
SMU1	(Fry 2007)
SNAP29	(Rager 2014)
SNF1LK	(Fry 2007)
SNORD12	(Rager 2014)
SNORD96B	(Rager 2014)
SNRPA1	(Fry 2007)
SNX16	(Rager 2014)
SNX19	(Rager 2014)
SOCS3	(Fry 2007)
SOD2	(Fry 2007)
SORCS2	(Kippler 2013)
SOX4	(Fry 2007)
SP3	(Fry 2007)
SPNS2	(Rager 2014)
SPTLC2	(Fry 2007)
SPTY2D1	(Sanders 2014)
SRA1	(Rager 2014)
SREK1	(Rager 2014)
SRP14	(Kippler 2013)
SSU72	(Rager 2014), (Rojas 2014)
STAC3	(Rager 2014), (Rojas 2014)
STAT1	(Fry 2007)
STCH	(Fry 2007)
STK10	(Kippler 2013)
STK17B	(Fry 2007)
STK4	(Fry 2007)
STX7	(Kippler 2013)
SUB1	(Fry 2007)
SYAP1	(Fry 2007)
SYNCRIP	(Fry 2007)
TA-NFKBH	(Fry 2007)
TAP1	(Rager 2014)
TBCD	(Kippler 2013)
TCEAL3	(Rager 2014)
TDGF1	(Sanders 2014)
TET1	(Rager 2014)
TEX264	(Rager 2014), (Rojas 2014)
TEX35	(Rager 2014)
TFDP1	(Fry 2007)
TGFBR2	(Bailey 2014)
TGM3	(Rager 2014)
THBD	(Fry 2007)
THBS1	(Fry 2007)
THRA	(Rager 2014)
THSD7A	(Kippler 2013)
TIMP1	(Fry 2007)
TIMP-2	(Bailey 2014)
TLE6	(Rager 2014)
TLR5	(Rager 2014)
TLR9	(Rager 2014)
TLX1NB	(Rager 2014)
TM7SF3	(Sanders 2014)
TMCC3	(Fry 2007)
TMEM159	(Rager 2014)
TMEM161B	(Sanders 2014)
TMEM179	(Kippler 2013)
TMEM185B	(Rager 2014)
TMEM196	(Rager 2014)
TMEM209	(Sanders 2014)
TMEM216	(Rager 2014)
TMEM43	(Rager 2014)
TMEM56	(Fry 2007)
TMEM63C	(Rager 2014), (Rojas 2014)
TMEM88	(Rager 2014)
TMEM9B	(Kippler 2013)
TMP_LOCU	(Sanders 2014)
TNCRNA	(Fry 2007)
TNF	(Ahmed 2011)
TNFAIP3	(Fry 2007)
TNFAIP6	(Fry 2007)
TNFAIP8L2	(Fry 2007)
TNFAIP8L3	(Rager 2014)
TNFRSF10D	(Fry 2007)
TNFRSF11A	(Bailey 2014)
TNFRSF12A	(Bailey 2014)
TNFRSF13C	(Bailey 2014)
TNFRSF17	(Bailey 2014)
TNFRSF19	(Bailey 2014)
TNFRSF1B	(Bailey 2014)
TNFRSF21	(Fry 2007)
TNFSF12	(Bailey 2014)
TNFSF14	(Fry 2007)
TNFSF15	(Bailey 2014)
TNFSF8	(Fry 2007)
TNPO1	(Fry 2007)
TNS1	(Rager 2014), (Rojas 2014)
TOB1	(Fry 2007)
TOP1	(Fry 2007)
TP53	(Intarasunanont 2012)
TP53INP2	(Fry 2007)
TPM4	(Fry 2007)
TPR	(Sanders 2014)
TRBV6-7	(Rager 2014)
TREM1	(Fry 2007), (Rager 2014)
TRIB1	(Fry 2007), (Rager 2014), (Rojas 2014)
TRIM25	(Rager 2014)
TSC22D2	(Fry 2007)
TSPAN10	(Rager 2014)
TTC40	(Kippler 2013)
TTI1	(Rager 2014)
TUBB8	(Rager 2014)
TUBGCP2	(Rager 2014)
TWF2	(Rager 2014)
TWSG1	(Rager 2014)
TXLNG	(Rager 2014)
TXNDC12	(Rager 2014)
U2AF1L4	(Rager 2014)
UBB	(Rager 2014)
UBE2B	(Fry 2007)
UBE2D3	(Fry 2007)
UBE2H	(Fry 2007)
UBE2QL1	(Kippler 2013)
UBN2	(Rager 2014)
UCK1	(Rager 2014)
UCP1	(Sanders 2014)
ULK1	(Rager 2014), (Rojas 2014)
UNC84A	(Sanders 2014)
UPF2	(Kippler 2013)
URG4	(Fry 2007)
USP15	(Fry 2007)
USP31	(Rager 2014)
USP33	(Rager 2014)
VAV1	(Rager 2014)
VEGFB	(Bailey 2014)
VIL2	(Fry 2007)
VNN3	(Fry 2007)
WASPIP	(Fry 2007)
WDR55	(Rager 2014), (Rojas 2014)
WDR75	(Sanders 2014)
WFDC13	(Rager 2014)
WISP1	(Bailey 2014)
WNT3	(Rager 2014)
WTAP	(Fry 2007)
XBP1	(Rager 2014)
YAF2	(Fry 2007)
YME1L1	(Fry 2007)
ZA20D3	(Fry 2007)
ZC3H12A	(Fry 2007)
ZCCHC9	(Sanders 2014)
ZFAND2A	(Fry 2007)
ZFP36	(Fry 2007)
ZIC5	(Rager 2014)
ZMYND10	(Rager 2014)
ZNF207	(Sanders 2014)
ZNF219	(Rager 2014)
ZNF281	(Fry 2007)
ZNF317	(Sanders 2014)
ZNF319	(Rager 2014)
ZNF326	(Rager 2014), (Rojas 2014)
ZNF331	(Fry 2007)
ZNF384	(Rager 2014), (Rojas 2014)
ZNF385C	(Rager 2014)
ZNF394	(Fry 2007)
ZNF496	(Fry 2007)
ZNF536	(Sanders 2014)
ZNF546	(Rager 2014)
ZNF600	(Rager 2014)
ZNF638	(Fry 2007)
ZNF708	(Fry 2007)
ZNF710	(Rager 2014)
ZNF767	(Rager 2014)
ZNF772	(Rager 2014)
ZSWIM6	(Rager 2014)
ZZEF1	(Rager 2014)
1 Sources in detail:
Ahmed S, Mahabbat-e Khoda S, Rekha RS, Gardner RM, Ameer SS, Moore S, Ekstrom EC, Vahter M, Raqib R: Arsenic-associated oxidative stress, inflammation, and immune disruption in human placenta and cord blood. Environ Health Perspect 2011, 119:258-264.
Bailey KA, Laine J, Rager JE, Sebastian E, Olshan A, Smeester L, Drobna Z, Styblo M, Rubio-Andrade M, Garcia-Vargas G, Fry RC: Prenatal Arsenic Exposure and Shifts in the Newborn Proteome: Interindividual Differences in Tumor Necrosis Factor (TNF)-Responsive Signaling. Toxicol Sci 2014, 139:328-337.
Broberg K, Ahmed S, Engström K, Hossain MB, Jurkovic Mlakar S, Bottai M, Grandér M, Raqib R, Vahter M: Arsenic exposure in early pregnancy alters genome-wide DNA methylation in cord blood, particularly in boys. J Dev Orig Health Dis 2014, 5:288-298.
Fei DL, Koestler DC, Li Z, Giambelli C, Sanchez-Mejias A, Gosse JA, Marsit CJ, Karagas MR, Robbins DJ: Association between In Utero arsenic exposure, placental gene expression, and infant birth weight: a US birth cohort study. Environ Health 2013, 12:58.
Fry RC, Navasumrit P, Valiathan C, Svensson JP, Hogan BJ, Luo M, Bhattacharya S, Kandjanapa K, Soontararuks S, Nookabkaew S, et al: Activation of inflammation/NF-kappaB signaling in infants born to arsenic-exposed mothers. PLoS Genet 2007, 3:e207.
Intarasunanont P, Navasumrit P, Waraprasit S, Chaisatra K, Suk WA, Mahidol C, Ruchirawat M: Effects of arsenic exposure on DNA methylation in cord blood samples from newborn babies and in a human lymphoblast cell line. Environ Health 2012, 11:31.
Kile ML, Baccarelli A, Hoffman E, Tarantini L, Quamruzzaman Q, Rahman M, Mahiuddin G, Mostofa G, Hsueh YM, Wright RO, Christiani DC: Prenatal arsenic exposure and DNA methylation in maternal and umbilical cord blood leukocytes. Environ Health Perspect 2012, 120:1061-1066
Kippler M, Engstrom K, Mlakar SJ, Bottai M, Ahmed S, Hossain MB, Raqib R, Vahter M, Broberg K: Sex-specific effects of early life cadmium exposure on DNA methylation and implications for birth weight. Epigenetics 2013, 8:494-503.
Koestler DC, Avissar-Whiting M, Houseman EA, Karagas MR, Marsit CJ: Differential DNA methylation in umbilical cord blood of infants exposed to low levels of arsenic in utero. Environ Health Perspect 2013, 121:971-977.
Rager JE, Bailey KA, Smeester L, Miller SK, Parker JS, Laine JE, Drobna Z, Currier J, Douillet C, Olshan AF, et al: Prenatal arsenic exposure and the epigenome: altered microRNAs associated with innate and adaptive immune signaling in newborn cord blood. Environ Mol Mutagen 2014, 55:196-208.
Rojas, D.; Rager, J.E.; Smeester, L.; Bailey, K.A.; Drobná, Z.; Rubio-Andrade, M.; Stýblo, M.; García-Vargas, G.; Fry, R.C. Prenatal arsenic exposure and the epigenome: Identifying sites of 5-methyl cytosine alterations that predict functional changes in gene expression in newborn cord blood and subsequent birth outcomes. Toxicol Sci 2014, [Epud ahead of print].
Sanders AP, Smeester L, Rojas D, DeBussycher T, Wu MC, Wright FA, Zhou YH, Laine JE, Rager JE, Swamy GK, et al: Cadmium exposure and the epigenome: Exposure-associated patterns of DNA methylation in leukocytes from mother-baby pairs. Epigenetics 2014, 9:212-221.

## Sheet: TableS3
Table S3. List of infection and exposure-related (IER) genes (n = 82). X's denote genes with mRNA expression, protein expression, or DNA methylation changes related to prenatal iAs/Cd exposure. Arrows represent directionality of mRNA or protein expression and DNA methylation changes (increased or decreased in expression or DNA methylation levels). Star symbol (*) indicates variable directionality…
IER Gene Symbol	Altered mRNA Expression-Arsenic	Altered Protein Expression-Arsenic	Altered mRNA Expression-Arsenic	Altered Protein Expression-Arsenic	Altered DNA Methylation-Arsenic	Altered DNA Methylation-Arsenic	Altered DNA Methylation-Arsenic	Altered DNA Methylation-Cadmium	Altered DNA Methylation-Cadmium	KEGG Pathway Category
	(Fry 2007) 1	(Ahmed 2011) 1	(Rager 2014) 1	(Bailey 2014) 1	(Rojas 2014) 1	(Kile 2012) 1	(Intarasunanont 2012) 1	(Kippler 2013) 1	(Sanders 2014) 1	KEGG Database
ACTN4	x↓									parasitic
ARPC1B			x↓							bacterial
BID									x*	bacterial
BIRC3	x↑									parasitic
C4B								x↓		bacterial
CAMK2G			x↓							bacterial
CASP9									x*	bacterial, parasitic, viral
CCL4	x↑									bacterial
CD14	x↑									bacterial, parasitic
CD44	x↑									bacterial, viral
CD58	x↑									viral
CDKN1A	x↑									viral
CDKN2A						x↑				viral
CEBPB	x↑									bacterial
CHEK2			x↑							viral
CLEC7A	x↑									bacterial
CREM	x↑									viral
CXCL1	x↑			x*						bacterial, parasitic
DNM2			x↓							bacterial
EGR1	x↑									viral
ETS2	x↑									viral
FCAR	x↑									bacterial
FOS	x↑									bacterial, parasitic, viral
FYN	x↑									bacterial, viral
GNA15	x↑									parasitic
HBEGF	x↑									bacterial
HDAC4			x↓		x↓			x↓		viral
HLA-DPA1	x↑									bacterial, parasitic, viral
HLA-DQA1	x↑									bacterial, parasitic, viral
ICAM1	x↑									bacterial, parasitic, viral
IFNAR2				x*						viral
IFNG		x*								bacterial, parasitic, viral
IFNGR1	x↑									bacterial, parasitic, viral
IL1B	x↑									bacterial, parasitic, viral
IL1R2	x↑									parasitic, viral
IL8	x↑	x*								bacterial, parasitic, viral
ITGA5			x↓							bacterial
JUN	x↑									bacterial, parasitic, viral
KCNQ1			x↓		x↓					bacterial
LAMB1								x↑		parasitic
LDLR	x↑									parasitic, viral
MAP3K3			x↓							viral
MBL2	x↑									bacterial
NFATC1			x↓		x↓					viral
NFKB1	x↑									bacterial, parasitic, viral
NFKBIA	x↑		x↓							bacterial, parasitic, viral
NXT1	x↑									viral
PER1	x↑									viral
PIK3R1	x↑									bacterial, parasitic, viral
PLCG2								x↓		bacterial, viral
PLEKHM2									x*	bacterial
PLK3	x↑									bacterial
POLE3			x↓							viral
POLR2E								x↑		viral
PPP1CB	x↑									viral
PPP3R1	x↑									bacterial, viral
PTGS2	x↑									parasitic
PTMA	x↑									viral
PTTG1								x↑		viral
PXN			x↓							bacterial
RIPK2	x↑									bacterial
SAR1A	x↑									bacterial
SERPINB1	x↑									parasitic
SERPINB9	x↑									parasitic
SOCS3	x↑									viral
STAT1	x↑									bacterial, parasitic, viral
TAP1			x↓							viral
TGFBR2				x*						parasitic, viral
THBS1	x↑									parasitic
TLR5			x↓							bacterial
TLR9			x↓							bacterial, parasitic, viral
TNF		x*								bacterial, parasitic, viral
TNFAIP3	x↑									viral
TNFRSF10D	x↑									viral
TNFRSF13C				x*						viral
TNFSF14	x↓									viral
TP53							x↑			viral
TRIM25			x↓							viral
TUBB8			x↑							bacterial
WNT3			x↑							viral
XBP1			x↓							viral
ZFP36	x↑									viral
1 Sources in detail:
Ahmed S, Mahabbat-e Khoda S, Rekha RS, Gardner RM, Ameer SS, Moore S, Ekstrom EC, Vahter M, Raqib R: Arsenic-associated oxidative stress, inflammation, and immune disruption in human placenta and cord blood. Environ Health Perspect 2011, 119:258-264.
Bailey KA, Laine J, Rager JE, Sebastian E, Olshan A, Smeester L, Drobna Z, Styblo M, Rubio-Andrade M, Garcia-Vargas G, Fry RC: Prenatal Arsenic Exposure and Shifts in the Newborn Proteome: Interindividual Differences in Tumor Necrosis Factor (TNF)-Responsive Signaling. Toxicol Sci 2014, 139:328-337.
Broberg K, Ahmed S, Engström K, Hossain MB, Jurkovic Mlakar S, Bottai M, Grandér M, Raqib R, Vahter M: Arsenic exposure in early pregnancy alters genome-wide DNA methylation in cord blood, particularly in boys. J Dev Orig Health Dis 2014, 5:288-298.
Fei DL, Koestler DC, Li Z, Giambelli C, Sanchez-Mejias A, Gosse JA, Marsit CJ, Karagas MR, Robbins DJ: Association between In Utero arsenic exposure, placental gene expression, and infant birth weight: a US birth cohort study. Environ Health 2013, 12:58.
Fry RC, Navasumrit P, Valiathan C, Svensson JP, Hogan BJ, Luo M, Bhattacharya S, Kandjanapa K, Soontararuks S, Nookabkaew S, et al: Activation of inflammation/NF-kappaB signaling in infants born to arsenic-exposed mothers. PLoS Genet 2007, 3:e207.
Intarasunanont P, Navasumrit P, Waraprasit S, Chaisatra K, Suk WA, Mahidol C, Ruchirawat M: Effects of arsenic exposure on DNA methylation in cord blood samples from newborn babies and in a human lymphoblast cell line. Environ Health 2012, 11:31.
Kile ML, Baccarelli A, Hoffman E, Tarantini L, Quamruzzaman Q, Rahman M, Mahiuddin G, Mostofa G, Hsueh YM, Wright RO, Christiani DC: Prenatal arsenic exposure and DNA methylation in maternal and umbilical cord blood leukocytes. Environ Health Perspect 2012, 120:1061-1066
Kippler M, Engstrom K, Mlakar SJ, Bottai M, Ahmed S, Hossain MB, Raqib R, Vahter M, Broberg K: Sex-specific effects of early life cadmium exposure on DNA methylation and implications for birth weight. Epigenetics 2013, 8:494-503.
Koestler DC, Avissar-Whiting M, Houseman EA, Karagas MR, Marsit CJ: Differential DNA methylation in umbilical cord blood of infants exposed to low levels of arsenic in utero. Environ Health Perspect 2013, 121:971-977.
Rager JE, Bailey KA, Smeester L, Miller SK, Parker JS, Laine JE, Drobna Z, Currier J, Douillet C, Olshan AF, et al: Prenatal arsenic exposure and the epigenome: altered microRNAs associated with innate and adaptive immune signaling in newborn cord blood. Environ Mol Mutagen 2014, 55:196-208.
Rojas, D.; Rager, J.E.; Smeester, L.; Bailey, K.A.; Drobná, Z.; Rubio-Andrade, M.; Stýblo, M.; García-Vargas, G.; Fry, R.C. Prenatal arsenic exposure and the epigenome: Identifying sites of 5-methyl cytosine alterations that predict functional changes in gene expression in newborn cord blood and subsequent birth outcomes. Toxicol Sci 2014, [Epud ahead of print].
Sanders AP, Smeester L, Rojas D, DeBussycher T, Wu MC, Wright FA, Zhou YH, Laine JE, Rager JE, Swamy GK, et al: Cadmium exposure and the epigenome: Exposure-associated patterns of DNA methylation in leukocytes from mother-baby pairs. Epigenetics 2014, 9:212-221.

## Sheet: TableS4
Table S4. Canonical pathways enriched within the 82 infection and exposure-related (IER) gene database.
Canonical Pathway	p-Value	Proteins Encoded by IER Genes in Canonical Pathway
Glucocorticoid Receptor Signaling	1.58489e-18	IFNG, CXCL8, ICAM1, PIK3R1, CEBPB, NFKB1, NFATC1, TGFBR2, IL1R2, FOS, NFKBIA, JUN, POLR2E, PPP3R1, CDKN1A, IL1B, PTGS2, STAT1, TNF
Role of Macrophages, Fibroblasts and Endothelial Cells in Rheumatoid Arthritis	1.99526e-17	CXCL8, SOCS3, ICAM1, WNT3, PIK3R1, CEBPB, NFKB1, TLR9, NFATC1, IL1R2, FOS, JUN, NFKBIA, TLR5, PLCG2, PPP3R1, IL1B, TNF, CAMK2G
Molecular Mechanisms of Cancer	1.25893e-14	TP53, CDKN2A, FYN, WNT3, PIK3R1, ITGA5, NFKB1, TGFBR2, FOS, NFKBIA, JUN, CASP9, GNA15, CDKN1A, BID, BIRC3, CHEK2, CAMK2G
Role of Osteoblasts, Osteoclasts and Chondrocytes in Rheumatoid Arthritis	2.51189e-14	IFNG, WNT3, PIK3R1, ITGA5, NFKB1, NFATC1, IL1R2, FOS, JUN, CASP9, NFKBIA, PPP3R1, IL1B, TNF, BIRC3
Colorectal Cancer Metastasis Signaling	6.30957e-14	TP53, IFNG, WNT3, PIK3R1, IFNGR1, TLR9, NFKB1, TGFBR2, FOS, JUN, CASP9, TLR5, PTGS2, STAT1, TNF
IL-6 Signaling	7.94328e-14	IL1R2, CXCL8, SOCS3, FOS, JUN, NFKBIA, PIK3R1, CD14, IL1B, CEBPB, NFKB1, TNF
PKCθ Signaling in T Lymphocytes	1e-13	FYN, FOS, JUN, NFKBIA, PLCG2, PIK3R1, PPP3R1, HLA-DQA1, NFKB1, MAP3K3, NFATC1, CAMK2G
Role of Pattern Recognition Receptors in Recognition of Bacteria and Viruses	2.51189e-13	CXCL8, IFNG, CLEC7A, MBL2, TLR5, PLCG2, PIK3R1, IL1B, TLR9, NFKB1, RIPK2, TNF
TNFR1 Signaling	5.01187e-13	FOS, JUN, CASP9, NFKBIA, TNFAIP3, BID, NFKB1, BIRC3, TNF
Toll-like Receptor Signaling	6.30957e-13	FOS, JUN, NFKBIA, TLR5, TNFAIP3, CD14, IL1B, TLR9, NFKB1, TNF
HGF Signaling	7.94328e-13	CDKN2A, FOS, PXN, JUN, ETS2, PLCG2, PIK3R1, CDKN1A, ITGA5, PTGS2, MAP3K3
Type I Diabetes Mellitus Signaling	1.25893e-12	SOCS3, IFNG, CASP9, NFKBIA, HLA-DQA1, BID, IL1B, IFNGR1, STAT1, NFKB1, TNF
Hepatic Fibrosis / Hepatic Stellate Cell Activation	2.51189e-12	TGFBR2, IL1R2, IFNG, CXCL8, ICAM1, IL1B, CD14, IFNGR1, STAT1, NFKB1, IFNAR2, TNF, TNFSF14
Role of PKR in Interferon Induction and Antiviral Response	5.01187e-12	TP53, IFNG, CASP9, NFKBIA, BID, STAT1, NFKB1, TNF
NF-κB Signaling	1e-11	IL1R2, TGFBR2, NFKBIA, TLR5, PLCG2, PIK3R1, TNFAIP3, IL1B, TLR9, NFKB1, MAP3K3, TNF
IL-10 Signaling	1.25893e-11	IL1R2, SOCS3, FOS, JUN, NFKBIA, CD14, IL1B, NFKB1, TNF
iNOS Signaling	1.25893e-11	IFNG, FOS, JUN, NFKBIA, CD14, IFNGR1, STAT1, NFKB1
Production of Nitric Oxide and Reactive Oxygen Species in Macrophages	1.58489e-11	IFNG, FOS, JUN, NFKBIA, PLCG2, PIK3R1, PPP1CB, IFNGR1, STAT1, NFKB1, MAP3K3, TNF
Pancreatic Adenocarcinoma Signaling	2.51189e-11	CDKN2A, TP53, TGFBR2, CASP9, PIK3R1, CDKN1A, HBEGF, PTGS2, STAT1, NFKB1
TNFR2 Signaling	3.16228e-11	FOS, JUN, NFKBIA, TNFAIP3, NFKB1, BIRC3, TNF
TREM1 Signaling	3.16228e-11	CXCL8, ICAM1, TLR5, PLCG2, ITGA5, IL1B, TLR9, NFKB1, TNF
Regulation of IL-2 Expression in Activated and Anergic T Lymphocytes	5.01187e-11	TGFBR2, FYN, FOS, JUN, NFKBIA, PLCG2, PPP3R1, NFKB1, NFATC1
CD28 Signaling in T Helper Cells	7.94328e-11	FYN, FOS, JUN, NFKBIA, ARPC1B, PIK3R1, PPP3R1, HLA-DQA1, NFKB1, NFATC1
HMGB1 Signaling	1e-10	CXCL8, IFNG, FOS, ICAM1, JUN, PIK3R1, IL1B, IFNGR1, NFKB1, TNF
RANK Signaling in Osteoclasts	1.31826e-10	FOS, JUN, NFKBIA, PIK3R1, PPP3R1, NFKB1, BIRC3, MAP3K3, NFATC1
Acute Phase Response Signaling	1.47911e-10	C4A/C4B, SOCS3, FOS, MBL2, JUN, NFKBIA, PIK3R1, IL1B, CEBPB, NFKB1, TNF
Role of NFAT in Regulation of the Immune Response	1.65959e-10	FYN, FOS, JUN, NFKBIA, GNA15, PLCG2, PIK3R1, PPP3R1, HLA-DQA1, NFKB1, NFATC1
PI3K Signaling in B Lymphocytes	1.77828e-10	FYN, FOS, JUN, NFKBIA, PLCG2, PIK3R1, PPP3R1, NFKB1, NFATC1, CAMK2G
Dendritic Cell Maturation	2.75423e-10	ICAM1, NFKBIA, PLCG2, PIK3R1, HLA-DQA1, CD58, IL1B, STAT1, TLR9, NFKB1, TNF
CD40 Signaling	3.31131e-10	FOS, ICAM1, JUN, NFKBIA, PIK3R1, TNFAIP3, PTGS2, NFKB1
MIF Regulation of Innate Immunity	4.0738e-10	TP53, FOS, JUN, NFKBIA, CD14, PTGS2, NFKB1
JAK/Stat Signaling	7.58578e-10	SOCS3, FOS, JUN, PIK3R1, CDKN1A, CEBPB, STAT1, NFKB1
IL-17A Signaling in Gastric Cells	8.51138e-10	CXCL8, FOS, JUN, CXCL1, NFKB1, TNF
Prolactin Signaling	8.51138e-10	FYN, SOCS3, FOS, JUN, PLCG2, PIK3R1, CEBPB, STAT1
Role of Tissue Factor in Cancer	1e-09	TP53, CXCL8, FYN, GNA15, PIK3R1, EGR1, HBEGF, IL1B, CXCL1
CD27 Signaling in Lymphocytes	2.29087e-09	FOS, JUN, CASP9, NFKBIA, BID, NFKB1, MAP3K3
Altered T Cell and B Cell Signaling in Rheumatoid Arthritis	3.89045e-09	IFNG, TLR5, HLA-DQA1, IL1B, TLR9, NFKB1, TNFRSF13C, TNF
B Cell Receptor Signaling	3.98107e-09	JUN, NFKBIA, PLCG2, PIK3R1, EGR1, PPP3R1, NFKB1, MAP3K3, NFATC1, CAMK2G
Apoptosis Signaling	4.2658e-09	TP53, CASP9, NFKBIA, PLCG2, BID, NFKB1, BIRC3, TNF
Communication between Innate and Adaptive Immune Cells	5.01187e-09	CXCL8, IFNG, CCL4, TLR5, IL1B, TLR9, TNFRSF13C, TNF
IL-12 Signaling and Production in Macrophages	6.16595e-09	IFNG, FOS, JUN, PIK3R1, IFNGR1, CEBPB, STAT1, NFKB1, TNF
Induction of Apoptosis by HIV1	6.45654e-09	TP53, CASP9, NFKBIA, BID, NFKB1, BIRC3, TNF
PPAR Signaling	6.60693e-09	IL1R2, FOS, JUN, NFKBIA, IL1B, PTGS2, NFKB1, TNF
ERK/MAPK Signaling	7.07946e-09	FYN, FOS, PXN, ETS2, PLCG2, PIK3R1, ITGA5, PPP1CB, STAT1, NFATC1
T Cell Receptor Signaling	8.31764e-09	FYN, FOS, JUN, NFKBIA, PIK3R1, PPP3R1, NFKB1, NFATC1
Aryl Hydrocarbon Receptor Signaling	8.51138e-09	CDKN2A, TP53, FOS, JUN, CDKN1A, IL1B, NFKB1, TNF, CHEK2
Erythropoietin Signaling	1.41254e-08	SOCS3, FOS, JUN, NFKBIA, PLCG2, PIK3R1, NFKB1
B Cell Activating Factor Signaling	1.7378e-08	FOS, JUN, NFKBIA, NFKB1, TNFRSF13C, NFATC1
Small Cell Lung Cancer Signaling	2.13796e-08	TP53, CASP9, NFKBIA, PIK3R1, BID, PTGS2, NFKB1
IL-17 Signaling	2.39883e-08	CXCL8, JUN, PIK3R1, CXCL1, CEBPB, PTGS2, NFKB1
Tec Kinase Signaling	2.45471e-08	FYN, FOS, GNA15, PLCG2, PIK3R1, ITGA5, STAT1, NFKB1, TNF
Hepatic Cholestasis	3.01995e-08	IL1R2, CXCL8, IFNG, JUN, NFKBIA, CD14, IL1B, NFKB1, TNF
Systemic Lupus Erythematosus Signaling	3.54813e-08	FOS, JUN, PLCG2, PIK3R1, CREM, IL1B, TLR9, TNFRSF13C, TNF, NFATC1
Differential Regulation of Cytokine Production in Intestinal Epithelial Cells by IL-17A and IL-17F	3.98107e-08	IFNG, CCL4, IL1B, CXCL1, TNF
LXR/RXR Activation	4.7863e-08	IL1R2, C4A/C4B, LDLR, CD14, IL1B, PTGS2, NFKB1, TNF
Role of JAK1, JAK2 and TYK2 in Interferon Signaling	5.01187e-08	IFNG, IFNGR1, STAT1, IFNAR2, NFKB1
GNRH Signaling	7.94328e-08	FOS, JUN, GNA15, EGR1, NFKB1, MAP3K3, DNM2, CAMK2G
IL-8 Signaling	8.70964e-08	CXCL8, FOS, ICAM1, JUN, PIK3R1, HBEGF, CXCL1, PTGS2, NFKB1
UVA-Induced MAPK Signaling	9.77237e-08	TP53, FOS, JUN, CASP9, PLCG2, PIK3R1, STAT1
Lymphotoxin β Receptor Signaling	1.12202e-07	CASP9, NFKBIA, PIK3R1, CXCL1, NFKB1, TNFSF14
Role of IL-17A in Arthritis	1.12202e-07	CXCL8, NFKBIA, PIK3R1, CXCL1, PTGS2, NFKB1
Chronic Myeloid Leukemia Signaling	1.41254e-07	CDKN2A, TP53, TGFBR2, HDAC4, PIK3R1, CDKN1A, NFKB1
ATM Signaling	1.90546e-07	TP53, JUN, NFKBIA, CDKN1A, BID, CHEK2
p53 Signaling	2.04174e-07	CDKN2A, TP53, JUN, THBS1, PIK3R1, CDKN1A, CHEK2
Cholecystokinin/Gastrin-mediated Signaling	2.51189e-07	FOS, PXN, JUN, CREM, IL1B, PTGS2, TNF
IL-9 Signaling	3.16228e-07	SOCS3, PIK3R1, STAT1, NFKB1, TNF
TWEAK Signaling	3.16228e-07	CASP9, NFKBIA, BID, NFKB1, BIRC3
Inhibition of Angiogenesis by TSP1	3.16228e-07	TP53, TGFBR2, FYN, JUN, THBS1
IL-17A Signaling in Fibroblasts	3.71535e-07	FOS, JUN, NFKBIA, CEBPB, NFKB1
iCOS-iCOSL Signaling in T Helper Cells	3.98107e-07	NFKBIA, PIK3R1, PPP3R1, HLA-DQA1, NFKB1, NFATC1, CAMK2G
Renin-Angiotensin Signaling	4.2658e-07	FOS, JUN, PLCG2, PIK3R1, STAT1, NFKB1, TNF
Interferon Signaling	4.2658e-07	IFNG, IFNGR1, STAT1, IFNAR2, TAP1
April Mediated Signaling	5.7544e-07	FOS, JUN, NFKBIA, NFKB1, NFATC1
T Helper Cell Differentiation	5.88844e-07	TGFBR2, IFNG, HLA-DQA1, IFNGR1, STAT1, TNF
Chemokine Signaling	5.88844e-07	FOS, JUN, CCL4, PLCG2, PPP1CB, CAMK2G
LPS-stimulated MAPK Signaling	6.91831e-07	FOS, JUN, NFKBIA, PIK3R1, CD14, NFKB1
Protein Kinase A Signaling	7.07946e-07	TGFBR2, PXN, NFKBIA, PLCG2, PPP3R1, CREM, PPP1CB, PTGS2, NFKB1, NFATC1, CAMK2G
Granulocyte Adhesion and Diapedesis	8.91251e-07	IL1R2, CXCL8, ICAM1, CCL4, ITGA5, IL1B, CXCL1, TNF
Differential Regulation of Cytokine Production in Macrophages and T Helper Cells by IL-17A and IL-17F	9.12011e-07	CCL4, IL1B, CXCL1, TNF
Atherosclerosis Signaling	9.54993e-07	CXCL8, IFNG, ICAM1, IL1B, NFKB1, TNF, TNFSF14
PI3K/AKT Signaling	9.54993e-07	TP53, NFKBIA, PIK3R1, CDKN1A, ITGA5, PTGS2, NFKB1
PPARα/RXRα Activation	9.77237e-07	IL1R2, TGFBR2, JUN, NFKBIA, GNA15, PLCG2, IL1B, NFKB1
Role of IL-17F in Allergic Inflammatory Airway Diseases	1.20226e-06	CXCL8, CCL4, IL1B, CXCL1, NFKB1
ILK Signaling	1.31826e-06	FOS, PXN, JUN, PIK3R1, PTGS2, ACTN4, NFKB1, TNF
Role of Hypercytokinemia/hyperchemokinemia in the Pathogenesis of Influenza	1.34896e-06	CXCL8, IFNG, CCL4, IL1B, TNF
Prostate Cancer Signaling	1.38038e-06	TP53, CASP9, NFKBIA, PIK3R1, CDKN1A, NFKB1
Axonal Guidance Signaling	2.23872e-06	FYN, PXN, ARPC1B, WNT3, GNA15, TUBB8, PLCG2, PIK3R1, PPP3R1, ITGA5, NFATC1
Integrin Signaling	2.39883e-06	FYN, PXN, ARPC1B, PLCG2, PIK3R1, ITGA5, PPP1CB, ACTN4
Death Receptor Signaling	2.69153e-06	CASP9, NFKBIA, BID, NFKB1, BIRC3, TNF
Tumoricidal Function of Hepatic Natural Killer Cells	3.0903e-06	SERPINB9, ICAM1, CASP9, BID
Gαq Signaling	3.16228e-06	NFKBIA, GNA15, PLCG2, PIK3R1, PPP3R1, NFKB1, NFATC1
Glioma Signaling	3.23594e-06	CDKN2A, TP53, PLCG2, PIK3R1, CDKN1A, CAMK2G
IGF-1 Signaling	3.71535e-06	SOCS3, FOS, PXN, JUN, CASP9, PIK3R1
Thrombopoietin Signaling	3.71535e-06	FOS, JUN, PLCG2, PIK3R1, STAT1
Nur77 Signaling in T Lymphocytes	4.46684e-06	CASP9, PPP3R1, HLA-DQA1, MAP3K3, NFATC1
Myc Mediated Apoptosis Signaling	4.89779e-06	CDKN2A, TP53, CASP9, PIK3R1, BID
Rac Signaling	5.49541e-06	JUN, ARPC1B, PIK3R1, CD44, ITGA5, NFKB1
Germ Cell-Sertoli Cell Junction Signaling	5.62341e-06	TGFBR2, PXN, TUBB8, PIK3R1, ACTN4, MAP3K3, TNF
Role of BRCA1 in DNA Damage Response	6.30957e-06	TP53, IFNG, CDKN1A, STAT1, CHEK2
Huntington's Disease Signaling	6.30957e-06	TP53, JUN, HDAC4, CASP9, GNA15, POLR2E, PIK3R1, DNM2
fMLP Signaling in Neutrophils	6.91831e-06	NFKBIA, ARPC1B, PIK3R1, PPP3R1, NFKB1, NFATC1
Cdc42 Signaling	7.4131e-06	FOS, JUN, ARPC1B, HLA-DQA1, ITGA5, PPP1CB, HLA-DPA1
Activation of IRF by Cytosolic Pattern Recognition Receptors	7.94328e-06	JUN, NFKBIA, STAT1, NFKB1, TNF
Phospholipase C Signaling	8.31764e-06	FYN, HDAC4, PLCG2, PPP3R1, ITGA5, PPP1CB, NFKB1, NFATC1
Endothelin-1 Signaling	8.91251e-06	FOS, JUN, CASP9, GNA15, PLCG2, PIK3R1, PTGS2
Role of PI3K/AKT Signaling in the Pathogenesis of Influenza	9.33254e-06	IFNG, CASP9, NFKBIA, PIK3R1, NFKB1
Hereditary Breast Cancer Signaling	9.77237e-06	TP53, HDAC4, POLR2E, PIK3R1, CDKN1A, CHEK2
Macropinocytosis Signaling	1.07152e-05	PLCG2, PIK3R1, ITGA5, CD14, ACTN4
14-3-3-mediated Signaling	1.09648e-05	FOS, JUN, TUBB8, PLCG2, PIK3R1, TNF
Type II Diabetes Mellitus Signaling	1.09648e-05	SOCS3, NFKBIA, PIK3R1, CEBPB, NFKB1, TNF
p38 MAPK Signaling	1.09648e-05	IL1R2, TP53, TGFBR2, IL1B, STAT1, TNF
PTEN Signaling	1.14815e-05	TGFBR2, CASP9, PIK3R1, CDKN1A, ITGA5, NFKB1
Growth Hormone Signaling	1.14815e-05	SOCS3, FOS, PLCG2, PIK3R1, STAT1
MIF-mediated Glucocorticoid Regulation	1.14815e-05	NFKBIA, CD14, PTGS2, NFKB1
IL-3 Signaling	1.31826e-05	FOS, JUN, PIK3R1, PPP3R1, STAT1
Agranulocyte Adhesion and Diapedesis	1.65959e-05	CXCL8, ICAM1, CCL4, ITGA5, IL1B, CXCL1, TNF
Antigen Presentation Pathway	1.86209e-05	IFNG, HLA-DQA1, TAP1, HLA-DPA1
PDGF Signaling	1.94984e-05	FOS, JUN, PLCG2, PIK3R1, STAT1
Ovarian Cancer Signaling	2.0893e-05	CDKN2A, TP53, WNT3, PIK3R1, CD44, PTGS2
VDR/RXR Activation	2.0893e-05	SERPINB1, IFNG, CDKN1A, CD14, CEBPB
Leukocyte Extravasation Signaling	2.23872e-05	PXN, ICAM1, PLCG2, PIK3R1, CD44, ITGA5, ACTN4
Docosahexaenoic Acid (DHA) Signaling	2.29087e-05	CASP9, PIK3R1, BID, IL1B
Ceramide Signaling	2.34423e-05	FOS, JUN, PIK3R1, NFKB1, TNF
Relaxin Signaling	2.45471e-05	FOS, JUN, NFKBIA, GNA15, PIK3R1, NFKB1
Melanoma Signaling	3.0903e-05	CDKN2A, TP53, PIK3R1, CDKN1A
ErbB Signaling	3.38844e-05	FOS, JUN, PLCG2, PIK3R1, HBEGF
Bladder Cancer Signaling	3.54813e-05	CDKN2A, TP53, CXCL8, THBS1, CDKN1A
FAK Signaling	3.54813e-05	FYN, PXN, PLCG2, PIK3R1, ITGA5
Glioblastoma Multiforme Signaling	3.80189e-05	CDKN2A, TP53, WNT3, PLCG2, PIK3R1, CDKN1A
Virus Entry via Endocytic Pathways	3.98107e-05	FYN, PLCG2, PIK3R1, ITGA5, DNM2
Crosstalk between Dendritic Cells and Natural Killer Cells	3.98107e-05	IFNG, TLR9, NFKB1, TNF, CAMK2G
OX40 Signaling Pathway	3.98107e-05	JUN, NFKBIA, HLA-DQA1, NFKB1, HLA-DPA1
Actin Cytoskeleton Signaling	3.98107e-05	PXN, ARPC1B, PIK3R1, ITGA5, CD14, PPP1CB, ACTN4
IL-1 Signaling	4.46684e-05	FOS, JUN, NFKBIA, GNA15, NFKB1
Cardiac Hypertrophy Signaling	4.7863e-05	TGFBR2, JUN, GNA15, PLCG2, PIK3R1, PPP3R1, MAP3K3
CXCR4 Signaling	4.7863e-05	FOS, PXN, JUN, GNA15, PIK3R1, EGR1
SAPK/JNK Signaling	5.12861e-05	TP53, JUN, PIK3R1, MAP3K3, NFATC1
Graft-versus-Host Disease Signaling	5.24807e-05	IFNG, HLA-DQA1, IL1B, TNF
Cell Cycle: G2/M DNA Damage Checkpoint Regulation	5.7544e-05	CDKN2A, TP53, CDKN1A, CHEK2
Amyotrophic Lateral Sclerosis Signaling	6.30957e-05	TP53, CASP9, PIK3R1, BID, BIRC3
Signaling by Rho Family GTPases	6.45654e-05	FOS, JUN, ARPC1B, GNA15, PIK3R1, ITGA5, NFKB1
Telomerase Signaling	6.60693e-05	TP53, HDAC4, ETS2, PIK3R1, CDKN1A
UVB-Induced MAPK Signaling	7.76247e-05	TP53, FOS, JUN, PIK3R1
Wnt/β-catenin Signaling	8.70964e-05	CDKN2A, TP53, TGFBR2, JUN, WNT3, CD44
NGF Signaling	9.54993e-05	TP53, PLCG2, PIK3R1, NFKB1, MAP3K3
Role of Cytokines in Mediating Communication between Immune Cells	9.54993e-05	CXCL8, IFNG, IL1B, TNF
EGF Signaling	9.54993e-05	FOS, JUN, PIK3R1, STAT1
Role of NFAT in Cardiac Hypertrophy	0.00011749	TGFBR2, HDAC4, PLCG2, PIK3R1, PPP3R1, CAMK2G
Sertoli Cell-Sertoli Cell Junction Signaling	0.00011749	JUN, TUBB8, ITGA5, ACTN4, MAP3K3, TNF
Clathrin-mediated Endocytosis Signaling	0.000141254	LDLR, ARPC1B, PIK3R1, PPP3R1, ITGA5, DNM2
Estrogen-Dependent Breast Cancer Signaling	0.000144544	FOS, JUN, PIK3R1, NFKB1
GM-CSF Signaling	0.000144544	PIK3R1, PPP3R1, STAT1, CAMK2G
Gα12/13 Signaling	0.000144544	PXN, JUN, NFKBIA, PIK3R1, NFKB1
Synaptic Long Term Potentiation	0.000158489	GNA15, PLCG2, PPP3R1, PPP1CB, CAMK2G
P2Y Purigenic Receptor Signaling Pathway	0.000158489	FOS, JUN, PLCG2, PIK3R1, NFKB1
Xenobiotic Metabolism Signaling	0.000162181	HDAC4, PIK3R1, IL1B, NFKB1, MAP3K3, TNF, CAMK2G
Retinoic acid Mediated Apoptosis Signaling	0.000162181	IFNG, CASP9, BID, TNFRSF10D
IL-17A Signaling in Airway Cells	0.000162181	NFKBIA, PIK3R1, CXCL1, NFKB1
Cell Cycle: G1/S Checkpoint Regulation	0.000162181	CDKN2A, TP53, HDAC4, CDKN1A
Thrombin Signaling	0.000169824	GNA15, PLCG2, PIK3R1, PPP1CB, NFKB1, CAMK2G
Breast Cancer Regulation by Stathmin1	0.000169824	TP53, TUBB8, PIK3R1, CDKN1A, PPP1CB, CAMK2G
Non-Small Cell Lung Cancer Signaling	0.00017378	CDKN2A, TP53, CASP9, PIK3R1
IL-15 Signaling	0.00018197	CXCL8, PIK3R1, NFKB1, TNF
Angiopoietin Signaling	0.00018197	CASP9, NFKBIA, PIK3R1, NFKB1
GDNF Family Ligand-Receptor Interactions	0.000204174	FOS, JUN, PLCG2, PIK3R1
Remodeling of Epithelial Adherens Junctions	0.000204174	ARPC1B, TUBB8, ACTN4, DNM2
CCR5 Signaling in Macrophages	0.000218776	FOS, JUN, CCL4, PLCG2
Agrin Interactions at Neuromuscular Junction	0.000218776	PXN, JUN, LAMB1, ITGA5
PEDF Signaling	0.000245471	TP53, NFKBIA, PIK3R1, NFKB1
NF-κB Activation by Viruses	0.000269153	NFKBIA, PIK3R1, ITGA5, NFKB1
Role of p14/p19ARF in Tumor Suppression	0.000281838	CDKN2A, TP53, PIK3R1
4-1BB Signaling in T Lymphocytes	0.00030903	JUN, NFKBIA, NFKB1
HER-2 Signaling in Breast Cancer	0.000316228	TP53, CASP9, PIK3R1, CDKN1A
Cyclins and Cell Cycle Regulation	0.000346737	CDKN2A, TP53, HDAC4, CDKN1A
Airway Pathology in Chronic Obstructive Pulmonary Disease	0.000501187	CXCL8, TNF
Allograft Rejection Signaling	0.000501187	IFNG, HLA-DQA1, TNF, HLA-DPA1
Neuregulin Signaling	0.000549541	PLCG2, PIK3R1, ITGA5, HBEGF
G Beta Gamma Signaling	0.000549541	GNA15, PLCG2, HBEGF, DNM2
PAK Signaling	0.00057544	PXN, PIK3R1, ITGA5, TNF
VEGF Signaling	0.000630957	PXN, PLCG2, PIK3R1, ACTN4
Fcγ Receptor-mediated Phagocytosis in Macrophages and Monocytes	0.000676083	FYN, PXN, ARPC1B, PIK3R1
Tight Junction Signaling	0.000758578	TGFBR2, FOS, JUN, NFKB1, TNF
UVC-Induced MAPK Signaling	0.000776247	TP53, FOS, JUN
Antioxidant Action of Vitamin C	0.000794328	NFKBIA, PLCG2, NFKB1, TNF
G-Protein Coupled Receptor Signaling	0.000794328	FYN, NFKBIA, GNA15, PIK3R1, NFKB1, CAMK2G
CREB Signaling in Neurons	0.000831764	GNA15, POLR2E, PLCG2, PIK3R1, CAMK2G
Neuropathic Pain Signaling In Dorsal Horn Neurons	0.000891251	FOS, PLCG2, PIK3R1, CAMK2G
Ephrin Receptor Signaling	0.000912011	FYN, PXN, ARPC1B, GNA15, ITGA5
Role of RIG1-like Receptors in Antiviral Innate Immunity	0.000933254	NFKBIA, NFKB1, TRIM25
Paxillin Signaling	0.000954993	PXN, PIK3R1, ITGA5, ACTN4
MSP-RON Signaling Pathway	0.001	IFNG, PIK3R1, TNF
Regulation of the Epithelial-Mesenchymal Transition Pathway	0.00114815	TGFBR2, WNT3, PIK3R1, EGR1, NFKB1
Fc Epsilon RI Signaling	0.00123027	FYN, PLCG2, PIK3R1, TNF
Androgen Signaling	0.00131826	JUN, GNA15, POLR2E, NFKB1
Corticotropin Releasing Hormone Signaling	0.00134896	FOS, JUN, PLCG2, PTGS2
Role of IL-17A in Psoriasis	0.00138038	CXCL8, CXCL1
Endometrial Cancer Signaling	0.00144544	TP53, CASP9, PIK3R1
IL-2 Signaling	0.00151356	FOS, JUN, PIK3R1
Role of CHK Proteins in Cell Cycle Checkpoint Control	0.00169824	TP53, CDKN1A, CHEK2
Regulation of Cellular Mechanics by Calpain Protease	0.00186209	PXN, ITGA5, ACTN4
Granzyme B Signaling	0.0020893	CASP9, BID
LPS/IL-1 Mediated Inhibition of RXR Function	0.00251189	IL1R2, JUN, CD14, IL1B, TNF
Role of JAK1 and JAK3 in γc Cytokine Signaling	0.00251189	SOCS3, PIK3R1, STAT1
Insulin Receptor Signaling	0.00263027	FYN, SOCS3, PIK3R1, PPP1CB
Hypoxia Signaling in the Cardiovascular System	0.00275423	TP53, JUN, NFKBIA
Mitotic Roles of Polo-Like Kinase	0.00281838	PLK3, PTTG1, CHEK2
GADD45 Signaling	0.00295121	TP53, CDKN1A
Neurotrophin/TRK Signaling	0.00295121	FOS, JUN, PIK3R1
Role of MAPK Signaling in the Pathogenesis of Influenza	0.0030903	IFNG, PTGS2, TNF
eNOS Signaling	0.00316228	CASP9, PLCG2, PIK3R1, DNM2
Renal Cell Carcinoma Signaling	0.00346737	FOS, JUN, PIK3R1
Epithelial Adherens Junction Signaling	0.00354813	TGFBR2, ARPC1B, TUBB8, ACTN4
Endoplasmic Reticulum Stress Pathway	0.00363078	CASP9, XBP1
Caveolar-mediated Endocytosis Signaling	0.00363078	FYN, ITGA5, DNM2
STAT3 Pathway	0.00380189	TGFBR2, SOCS3, CDKN1A
Leptin Signaling in Obesity	0.00389045	SOCS3, PLCG2, PIK3R1
VEGF Family Ligand-Receptor Interactions	0.0042658	FOS, PLCG2, PIK3R1
IL-4 Signaling	0.0042658	PIK3R1, HLA-DQA1, NFATC1
Gap Junction Signaling	0.00436516	TUBB8, PLCG2, PIK3R1, PPP3R1
IL-22 Signaling	0.00467735	SOCS3, STAT1
Reelin Signaling in Neurons	0.00467735	FYN, PIK3R1, ITGA5
Dopamine-DARPP32 Feedback in cAMP Signaling	0.00501187	PLCG2, PPP3R1, CREM, PPP1CB
Role of JAK family kinases in IL-6-type Cytokine Signaling	0.00512861	SOCS3, STAT1
IL-15 Production	0.00588844	STAT1, NFKB1
TGF-β Signaling	0.00616595	TGFBR2, FOS, JUN
RhoGDI Signaling	0.00645654	ARPC1B, GNA15, CD44, ITGA5
RAR Activation	0.00691831	FOS, JUN, PIK3R1, NFKB1
Regulation of Actin-based Motility by Rho	0.00691831	ARPC1B, ITGA5, PPP1CB
Calcium Signaling	0.00724436	HDAC4, PPP3R1, NFATC1, CAMK2G
Cytotoxic T Lymphocyte-mediated Apoptosis of Target Cells	0.00831764	CASP9, BID
Complement System	0.00870964	C4A/C4B, MBL2
CDK5 Signaling	0.00891251	EGR1, LAMB1, PPP1CB
Role of JAK2 in Hormone-like Cytokine Signaling	0.00977237	SOCS3, STAT1
HIF1α Signaling	0.00977237	TP53, JUN, PIK3R1
Sphingosine-1-phosphate Signaling	0.0114815	CASP9, PLCG2, PIK3R1
Natural Killer Cell Signaling	0.011749	FYN, PLCG2, PIK3R1
Role of NANOG in Mammalian Embryonic Stem Cell Pluripotency	0.0120226	TP53, WNT3, PIK3R1
Netrin Signaling	0.0120226	PPP3R1, NFATC1
Thyroid Cancer Signaling	0.0125893	TP53, CXCL1
FcγRIIB Signaling in B Lymphocytes	0.0131826	PLCG2, PIK3R1
Role of Oct4 in Mammalian Embryonic Stem Cell Pluripotency	0.0165959	TP53, ETS2
Airway Inflammation in Asthma	0.0169824	TNF
FXR/RXR Activation	0.017378	C4A/C4B, IL1B, TNF
Ephrin A Signaling	0.0177828	FYN, PIK3R1
Human Embryonic Stem Cell Pluripotency	0.0199526	TGFBR2, WNT3, PIK3R1
CNTF Signaling	0.020893	PIK3R1, STAT1
Primary Immunodeficiency Signaling	0.020893	TAP1, TNFRSF13C
Actin Nucleation by ARP-WASP Complex	0.0239883	ARPC1B, ITGA5
Glioma Invasiveness Signaling	0.0245471	PIK3R1, CD44
ErbB2-ErbB3 Signaling	0.0245471	JUN, PIK3R1
ErbB4 Signaling	0.0275423	PLCG2, PIK3R1
Antiproliferative Role of Somatostatin Receptor 2	0.0295121	PIK3R1, CDKN1A
ERK5 Signaling	0.0295121	FOS, MAP3K3
Calcium-induced T Lymphocyte Apoptosis	0.030903	PPP3R1, HLA-DQA1
Melatonin Signaling	0.0363078	PLCG2, CAMK2G
Pathogenesis of Multiple Sclerosis	0.0380189	CCL4
Prostanoid Biosynthesis	0.0380189	PTGS2
Basal Cell Carcinoma Signaling	0.0380189	TP53, WNT3
Ephrin B Signaling	0.0389045	PXN, GNA15
FLT3 Signaling in Hematopoietic Progenitor Cells	0.0398107	PIK3R1, STAT1
BMP signaling pathway	0.0416869	JUN, NFKB1
NRF2-mediated Oxidative Stress Response	0.0416869	FOS, JUN, PIK3R1
Acute Myeloid Leukemia Signaling	0.042658	PIK3R1, NFKB1
Role of Wnt/GSK-3β Signaling in the Pathogenesis of Influenza	0.0446684	IFNG, WNT3
Superpathway of Inositol Phosphate Compounds	0.0489779	SOCS3, PLCG2, PIK3R1

## Sheet: TableS5
Table S5. The 20 most significant upstream regulators associated with the 82 infection and exposure-related (IER) genes.
Upstream Regulator	Molecule Type	p-Value	Target Molecules in IER Gene Database
lipopolysaccharide	chemical drug	4.98e-38	ACTN4, ARPC1B, BID, BIRC3, CCL4, CD14, CD44, CD58, CDKN1A, CEBPB, CLEC7A, CREM, CXCL1, CXCL8, EGR1, ETS2, FOS, FYN, GNA15, HBEGF, HLA-DQA1, ICAM1, IFNG, IL1R2, ITGA5, JUN, MBL2, NFATC1, NFKB1, NFKBIA, PIK3R1, PLK3, PPP1CB, PTGS2, RIPK2, SERPINB1, SERPINB9, SOCS3, STAT1, TAP1, THBS1, TLR5, TLR9, TNF, TNFAIP3, TNFSF14, TRIM25, XBP1, ZFP36
CSF2	cytokine	2.23e-30	BID, BIRC3, CCL4, CD14, CDKN1A, CLEC7A, CXCL1, CXCL8, EGR1, FOS, HBEGF, ICAM1, IFNG, NFATC1, NFKB1, NFKBIA, PTGS2, RIPK2, SERPINB9, SOCS3, THBS1, TLR5, TLR9, TNF, TNFAIP3, TNFRSF10D, TNFSF14, XBP1, ZFP36
TNF	cytokine	9.72e-30	BID, BIRC3, CCL4, CD14, CD44, CDKN1A, CEBPB, CREM, CXCL1, CXCL8, EGR1, FCAR, FOS, HBEGF, ICAM1, IFNAR2, IFNG, IFNGR1, IL1R2, ITGA5, JUN, LDLR, MBL2, NFATC1, NFKB1, NFKBIA, PLK3, PTGS2, RIPK2, SERPINB1, SERPINB9, SOCS3, STAT1, TAP1, TGFBR2, THBS1, TLR5, TNF, TNFAIP3, TNFRSF10D, TNFSF14, ZFP36
(poly(I:C))	chemical reagent	1.18e-28	BIRC3, CCL4, CD14, CD44, CEBPB, CLEC7A, CXCL1, CXCL8, EGR1, FOS, ICAM1, IFNG, IFNGR1, ITGA5, JUN, MBL2, NFKB1, NFKBIA, PTGS2, STAT1, TAP1, THBS1, TLR5, TNF, TNFAIP3, TRIM25, ZFP36
IL1B	cytokine	4.74e-27	BIRC3, CCL4, CD14, CD44, CDKN1A, CEBPB, CREM, CXCL1, CXCL8, EGR1, FOS, HBEGF, ICAM1, IFNG, IFNGR1, IL1R2, ITGA5, JUN, LDLR, NFKB1, NFKBIA, PLK3, PTGS2, RIPK2, SERPINB9, SOCS3, STAT1, TGFBR2, THBS1, TNF, TNFAIP3, ZFP36
NFkB (complex)	complex	1.56e-24	BID, BIRC3, CASP9, CCL4, CD44, CDKN1A, CEBPB, CREM, CXCL1, CXCL8, EGR1, FOS, ICAM1, IFNAR2, IFNG, JUN, MBL2, NFKB1, NFKBIA, PLK3, PTGS2, SOCS3, TAP1, TNF, TNFAIP3, TNFSF14, ZFP36
prostaglandin E2	chemical - endogenous mammalian	2.31e-24	BIRC3, CCL4, CD14, CD44, CDKN1A, CEBPB, CREM, CXCL1, CXCL8, EGR1, FOS, ICAM1, IFNG, IL1R2, ITGA5, JUN, NFKBIA, PTGS2, SOCS3, THBS1, TNF, TNFSF14
IFNG	cytokine	1.82e-23	BID, CASP9, CCL4, CD14, CD44, CDKN1A, CEBPB, CREM, CXCL1, CXCL8, EGR1, ETS2, FOS, HBEGF, HLA-DQA1, ICAM1, IFNG, IFNGR1, ITGA5, JUN, NFKB1, NFKBIA, PTGS2, RIPK2, SERPINB9, SOCS3, STAT1, TAP1, TGFBR2, THBS1, TLR5, TLR9, TNF, ZFP36
phorbol myristate acetate	chemical drug	2.52e-23	BIRC3, CCL4, CD14, CD44, CDKN1A, CREM, CXCL8, EGR1, ETS2, FOS, HBEGF, ICAM1, IFNG, IFNGR1, JUN, LDLR, NFATC1, NFKB1, NFKBIA, PER1, PTGS2, SERPINB9, SOCS3, STAT1, THBS1, TLR5, TLR9, TNF, TNFAIP3, TNFSF14, ZFP36
U0126	chemical - kinase inhibitor	1.34e-22	BIRC3, CCL4, CD44, CDKN1A, CEBPB, CXCL1, CXCL8, EGR1, FOS, HBEGF, ICAM1, IFNG, IL1R2, ITGA5, JUN, LDLR, NFATC1, PER1, PTGS2, SOCS3, TGFBR2, THBS1, TNF, ZFP36
IL10	cytokine	1.43e-22	CCL4, CD14, CD44, CDKN1A, CLEC7A, CXCL8, ETS2, FOS, ICAM1, IFNG, IL1R2, JUN, NFATC1, PTGS2, SOCS3, STAT1, TAP1, TLR5, TLR9, TNF, TNFRSF13C, ZFP36
cycloheximide	chemical reagent	2.36e-22	BIRC3, CCL4, CD44, CDKN1A, CEBPB, CXCL1, CXCL8, EGR1, FOS, HBEGF, ICAM1, IFNG, IL1R2, JUN, NFKBIA, PTGS2, PXN, SOCS3, TGFBR2, THBS1, TNF, TNFAIP3
beta-estradiol	chemical - endogenous mammalian	5.12e-22	BID, CASP9, CCL4, CD14, CD44, CDKN1A, CEBPB, CREM, CXCL1, CXCL8, EGR1, FOS, HBEGF, HDAC4, HLA-DQA1, ICAM1, IFNG, IL1R2, JUN, LDLR, NFKBIA, PIK3R1, PPP3R1, PTGS2, PTMA, PXN, SOCS3, TGFBR2, THBS1, TLR9, TNF, TNFAIP3, TRIM25, WNT3, XBP1, ZFP36
IL27	cytokine	1.37e-21	CCL4, CD14, CXCL8, EGR1, FOS, HLA-DPA1, HLA-DQA1, ICAM1, IFNG, NFATC1, PTGS2, SOCS3, STAT1, TAP1, TNF, TNFSF14
SP600125	chemical - kinase inhibitor	2.3e-21	CCL4, CD44, CDKN1A, CEBPB, CXCL1, CXCL8, EGR1, FOS, ICAM1, IFNG, JUN, LDLR, PER1, PTGS2, SOCS3, THBS1, TNF, ZFP36
TP53	transcription regulator	2.91e-21	ACTN4, ARPC1B, BID, BIRC3, CASP9, CCL4, CD44, CDKN1A, CEBPB, CHEK2, CXCL1, CXCL8, EGR1, FOS, FYN, HBEGF, HLA-DQA1, ICAM1, IFNG, JUN, NFKB1, NFKBIA, PIK3R1, POLR2E, PTGS2, SERPINB9, STAT1, TAP1, TGFBR2, THBS1, TNF, TNFRSF10D, ZFP36
IL6	cytokine	3.08e-21	CCL4, CD14, CD44, CDKN1A, CEBPB, CXCL1, CXCL8, EGR1, ETS2, FOS, HLA-DQA1, ICAM1, IFNG, JUN, LDLR, NFKB1, NFKBIA, PTGS2, SOCS3, STAT1, TAP1, THBS1, TLR5, TLR9, TNF, XBP1
CSF3	cytokine	3.68e-21	BIRC3, CD14, CD44, CEBPB, CXCL8, EGR1, FOS, HLA-DPA1, HLA-DQA1, ICAM1, IFNG, JUN, NFATC1, SOCS3, TLR5, TNF, TNFAIP3
CD40	transmembrane receptor	5.69e-21	BIRC3, CCL4, CD44, CDKN1A, CXCL8, FOS, ICAM1, IFNG, JUN, NFATC1, NFKB1, NFKBIA, PTGS2, TAP1, TLR9, TNF, TNFAIP3, XBP1
LY294002	chemical - kinase inhibitor	9.38e-21	BIRC3, CD14, CDKN1A, CEBPB, CREM, CXCL1, CXCL8, EGR1, ETS2, FOS, HBEGF, ICAM1, IFNG, IL1R2, JUN, NFKBIA, PIK3R1, PTGS2, SOCS3, THBS1, TNF, TNFAIP3, ZFP36

## Sheet: TableS6
Table S6. Transcription factor (TF) families with binding sites enriched for within the 82 infection and exposure-related (IER) gene database.
TF Family Symbol	TF Description	p-Value
ZF5F	ZF5 poz domain zinc finger	<1.00E-15
E2FF	E2F-myc activator/cell cycle regulator	<1.00E-15
EGRF	EGR/nerve growth factor induced protein C & related factors	<1.00E-15
SP1F	E2F-myc activator/cell cycle regulator	<1.00E-15
NRF1	Nuclear respiratory factor 2	<1.00E-15
CTCF	CTCF and BORIS gene family	<1.00E-15
ZF02	C2H2 zinc finger transcription factors 2	<1.00E-15
KLFS	Krueppel like transcription factors	<1.00E-15
MAZF	Myc associated zinc fingers	<1.00E-15
HDBP	Huntington's disease gene regulatory region binding proteins	<1.00E-15
XCPE	Activator-, mediator- and TBP-dependent core promoter element for RNA polymerase II transcription from TATA-less promoters	<1.00E-15
PLAG	Pleomorphic adenoma gene	<1.00E-15
MTEN	Core promoter motif ten elements	<1.00E-15
TF2B	RNA polymerase II transcription factor II B	<1.00E-15
NDPK	Nucleoside diphosphate kinase	<1.00E-15
CDEF	Cell cycle regulators: Cell cycle dependent element	<1.00E-15
AP2F	Activator protein 2	<1.00E-15
ZF07	C2H2 zinc finger transcription factors 7	<1.00E-15
NRSF	Neuron-restrictive silencer factor	<1.00E-15
DEAF	Homolog to deformed epidermal autoregulatory factor-1 from D. melanogaster	<1.00E-15
WHNF	Winged helix binding sites	2.44249e-15
AHRR	AHR-arnt heterodimers and AHR-related factors	1.86517e-14
NFKB	Nuclear factor kappa B/c-rel	3.71925e-14
MZF1	Myeloid zinc finger 1 factors	5.60663e-12
EBOX	E-box binding factors	1.69286e-10
PURA	Pur-alpha binds both single-stranded and douple-stranded DNA in a sequence-specific manner	2.05133e-09
HESF	Vertebrate homologues of enhancer of split complex	3.51932e-09
OAZF	Olfactory associated zinc finger protein	1.89896e-08
PAX9	PAX-9 binding sites	2.00967e-08
GLIF	GLI zinc finger family	4.64733e-08
GCMF	Chorion-specific transcription factors with a GCM DNA binding domain	7.60496e-08
NOLF	Neuron-specific olfactory factor	3.71067e-07
ETSF	Human and murine ETS1 factors	1.06859e-06
MTF1	Metal induced transcription factor	2.01334e-06
GABF	GA-boxes	2.6823e-06
NGRE	"Negative" glucocoticoid response elements	3.91098e-06
ZF57	KRAB domain zinc finger protein 57	4.09798e-06
CHRE	Carbohydrate response elements, consist of two E box motifs separated by 5 bp	7.80146e-06
MIZ1	Myc-interacting Zn finger protein 1	1.22151e-05
SMAD	Vertebrate SMAD family of transcription factors	1.89436e-05
SPZ1	Testis-specific bHLH-Zip transcription factors	2.78884e-05
TF2D	General transcription factor IID, GTF2D	4.07408e-05
HIFF	Hypoxia inducible factor, bHLH/PAS protein family	9.57399e-05
INSM	Insulinoma associated factors	0.000171797
PRDM	PRDI-BF1 and RIZ homologous (PR) domain proteins (PRDM)	0.000280293
PAX5	PAX-2/5/8 binding sites	0.000762195
HASF	HIF-1 ancillary sequence family	0.0013499
HNFP	Histone nuclear factor P	0.0113038
ZF01	C2H2 zinc finger transcription factors 1	0.0139034
RREB	Ras-responsive element binding protein	0.0146287
STAF	Selenocysteine tRNA activating factor	0.0178644
MYBL	Cellular and viral myb-like transcriptional regulators	0.0196993
YTBP	Yeast TATA binding protein factor	0.0227501

## Sheet: TableS7
Table S7. The relationship between infection and exposure-related (IER) genes and chemicals, as gathered through the Comparative Toxicogenomics Database.
IER Gene Symbol	Chemical Name	Interaction	Reference PubMed IDs
ACTN4	4-hydroxy-2-nonenal	ACTN4 protein binds to 4-hydroxy-2-nonenal	20043646
ACTN4	Aflatoxin B1	Aflatoxin B1 results in decreased expression of ACTN4 mRNA	22100608
ACTN4	beta-methylcholine	beta-methylcholine affects the expression of ACTN4 mRNA	21179406
ACTN4	bromovanin	bromovanin results in increased expression of ACTN4 protein	21419150
ACTN4	cobaltous chloride	cobaltous chloride results in decreased expression of ACTN4 mRNA	19320972
ACTN4	Cyclosporine	Cyclosporine results in decreased expression of ACTN4 mRNA	20106945
ACTN4	K 7174	K 7174 results in decreased expression of ACTN4 mRNA	24086573
ACTN4	Selenium	Selenium results in increased expression of ACTN4 mRNA	19244175
ACTN4	Simvastatin	Simvastatin results in increased expression of ACTN4 mRNA	16710349
ACTN4	Vitamin E	Vitamin E results in increased expression of ACTN4 mRNA	19244175
ARPC1B	arsenic trioxide	[Tretinoin co-treated with arsenic trioxide] results in increased expression of ARPC1B mRNA	15894607
ARPC1B	cobaltous chloride	cobaltous chloride results in decreased expression of ARPC1B mRNA	19320972|19376846
ARPC1B	Cyclosporine	Cyclosporine results in increased expression of ARPC1B mRNA	20106945
ARPC1B	Calcitriol	Calcitriol results in increased expression of ARPC1B mRNA	21592394
ARPC1B	Calcitriol	[Testosterone co-treated with Calcitriol] results in increased expression of ARPC1B mRNA	21592394
ARPC1B	methylmercuric chloride	methylmercuric chloride results in decreased expression of ARPC1B mRNA	23179753
ARPC1B	Methyl Methanesulfonate	Methyl Methanesulfonate results in decreased expression of ARPC1B mRNA	23649840
ARPC1B	monomethylarsonous acid	monomethylarsonous acid results in decreased expression of ARPC1B mRNA	20886546
ARPC1B	Phenobarbital	Phenobarbital affects the expression of ARPC1B mRNA	19159669
ARPC1B	Selenium	Selenium results in increased expression of ARPC1B mRNA	19244175
ARPC1B	sulindac sulfide	sulindac sulfide results in decreased expression of ARPC1B mRNA	12734198
ARPC1B	Testosterone	[Testosterone co-treated with Calcitriol] results in increased expression of ARPC1B mRNA	21592394
ARPC1B	Testosterone	Testosterone results in increased expression of ARPC1B mRNA	21592394
ARPC1B	testosterone enanthate	testosterone enanthate affects the expression of ARPC1B mRNA	17440010
ARPC1B	Tetrachlorodibenzodioxin	Tetrachlorodibenzodioxin results in increased expression of ARPC1B mRNA	20106945|21632981
ARPC1B	Tretinoin	[Tretinoin co-treated with arsenic trioxide] results in increased expression of ARPC1B mRNA	15894607
ARPC1B	Tretinoin	Tretinoin results in increased expression of ARPC1B mRNA	15894607
ARPC1B	Valproic Acid	Valproic Acid results in increased expression of ARPC1B mRNA	23179753|24383497
BID	10-methoxy-2,2-dimethyl-2,6-dihydropyrano(3,2-c)quinolin-5-one	10-methoxy-2,2-dimethyl-2,6-dihydropyrano(3,2-c)quinolin-5-one affects the localization of BID protein	20833157
BID	10-methoxy-2,2-dimethyl-2,6-dihydropyrano(3,2-c)quinolin-5-one	10-methoxy-2,2-dimethyl-2,6-dihydropyrano(3,2-c)quinolin-5-one affects the localization of BID protein alternative form	20833157
BID	10-methoxy-2,2-dimethyl-2,6-dihydropyrano(3,2-c)quinolin-5-one	CASP8 protein affects the susceptibility to [10-methoxy-2,2-dimethyl-2,6-dihydropyrano(3,2-c)quinolin-5-one affects the localization of BID protein alternative form]	20833157
BID	1,2-bis(2-aminophenoxy)ethane-N,N,N',N'-tetraacetic acid	1,2-bis(2-aminophenoxy)ethane-N,N,N',N'-tetraacetic acid inhibits the reaction [Diclofenac results in increased activity of BID protein]	18191430
BID	1-(3',4',5'-trimethoxyphenyl)-3-(3'',4''-dimethoxy-2'-hydroxyphenyl)propane	1-(3',4',5'-trimethoxyphenyl)-3-(3'',4''-dimethoxy-2'-hydroxyphenyl)propane results in increased expression of BID protein modified form	20674558
BID	1-trichloromethyl-1,2,3,4-tetrahydro-beta-carboline	1-trichloromethyl-1,2,3,4-tetrahydro-beta-carboline results in increased expression of BID mRNA	15447660
BID	2-(1H-indazol-4-yl)-6-(4-methanesulfonylpiperazin-1-ylmethyl)-4-morpholin-4-ylthieno(3,2-d)pyrimidine	[PIK3CA gene mutant form results in increased susceptibility to 2-(1H-indazol-4-yl)-6-(4-methanesulfonylpiperazin-1-ylmethyl)-4-morpholin-4-ylthieno(3,2-d)pyrimidine] which results in decreased expression of BID mRNA	20453058
BID	2,2-bis(4-glycidyloxyphenyl)propane	2,2-bis(4-glycidyloxyphenyl)propane results in increased cleavage of BID protein	12788809
BID	2'-(4-chlorophenyl)-3-(4-chlorophenylidene)-5,10-dimethyl-12-methylene-decahydro-1,2-(1',3'-dioxocyclopenta(c))azuleno(4,5-b)furan-4,11-dione	2'-(4-chlorophenyl)-3-(4-chlorophenylidene)-5,10-dimethyl-12-methylene-decahydro-1,2-(1',3'-dioxocyclopenta(c))azuleno(4,5-b)furan-4,11-dione affects the localization of BID protein	21741372
BID	2'-(4-chlorophenyl)-3-(4-chlorophenylidene)-5,10-dimethyl-12-methylene-decahydro-1,2-(1',3'-dioxocyclopenta(c))azuleno(4,5-b)furan-4,11-dione	2'-(4-chlorophenyl)-3-(4-chlorophenylidene)-5,10-dimethyl-12-methylene-decahydro-1,2-(1',3'-dioxocyclopenta(c))azuleno(4,5-b)furan-4,11-dione results in increased cleavage of and affects the localization of BID protein	21741372
BID	2-(4-morpholinyl)-8-phenyl-4H-1-benzopyran-4-one	2-(4-morpholinyl)-8-phenyl-4H-1-benzopyran-4-one promotes the reaction [Doxorubicin results in increased cleavage of and results in increased activity of and results in increased localization of BID protein]	20856197
BID	2-(4-morpholinyl)-8-phenyl-4H-1-benzopyran-4-one	BCL2 protein inhibits the reaction [2-(4-morpholinyl)-8-phenyl-4H-1-benzopyran-4-one promotes the reaction [Doxorubicin results in increased cleavage of and results in increased activity of and results in increased localization of BID protein]]	20856197
BID	2-5,6,7,8,4'-pentamethoxyflavanone	2-5,6,7,8,4'-pentamethoxyflavanone results in decreased expression of BID protein	19450678
BID	2-amino-4-hydroxy-6-formylpteridine	2-amino-4-hydroxy-6-formylpteridine results in decreased expression of BID protein	16019850
BID	2-methoxyestradiol-3,17-bis-O,O-sulfamate	2-methoxyestradiol-3,17-bis-O,O-sulfamate results in increased cleavage of BID protein	15258464
BID	3-(5'-hydroxymethyl-2'-furyl)-1-benzylindazole	3-(5'-hydroxymethyl-2'-furyl)-1-benzylindazole results in increased cleavage of and results in decreased expression of BID protein	19481069
BID	3-(5'-hydroxymethyl-2'-furyl)-1-benzylindazole	[Camptothecin co-treated with 3-(5'-hydroxymethyl-2'-furyl)-1-benzylindazole] results in increased cleavage of and results in decreased expression of BID protein	19481069
BID	4'-methoxy licoflavanone	4'-methoxy licoflavanone results in decreased expression of BID protein	23850732
BID	4-methylthioamphetamine	4-methylthioamphetamine results in increased expression of BID mRNA	23820845
BID	4-methylthioamphetamine	4-methylthioamphetamine results in increased expression of BID protein modified form	23820845
BID	4-methylthioamphetamine	[N-Methyl-3,4-methylenedioxyamphetamine co-treated with Methamphetamine co-treated with 4-methylthioamphetamine co-treated with Dextroamphetamine] results in increased expression of BID mRNA	23820845
BID	4-methylthioamphetamine	[N-Methyl-3,4-methylenedioxyamphetamine co-treated with Methamphetamine co-treated with 4-methylthioamphetamine co-treated with Dextroamphetamine] results in increased expression of BID protein modified form	23820845
BID	5,6-dichlorobenzimidazole	5,6-dichlorobenzimidazole promotes the reaction [TNFSF10 protein results in increased cleavage of BID protein]	15688023
BID	6-O-angeloylenolin	6-O-angeloylenolin results in increased cleavage of BID protein	21192922
BID	7-hydroxystaurosporine	[7-hydroxystaurosporine co-treated with Sirolimus] results in increased cleavage of BID protein	15767555
BID	ABT-737	[ABT-737 co-treated with celecoxib] results in increased cleavage of BID protein	20104024
BID	Acetaminophen	Acetaminophen results in decreased expression of BID mRNA	21420995
BID	Acetylcysteine	Acetylcysteine inhibits the reaction [cadmium acetate results in increased cleavage of BID protein]	16169029
BID	Acetylcysteine	Acetylcysteine inhibits the reaction [[Cisplatin co-treated with FASLG protein] results in decreased expression of BID protein]	17574045
BID	Acetylcysteine	Acetylcysteine inhibits the reaction [cordycepin results in decreased expression of BID protein]	21310227
BID	Acetylcysteine	Acetylcysteine inhibits the reaction [TNFSF10 protein results in decreased expression of BID protein]	23711929
BID	Acetylcysteine	[Acetylcysteine results in decreased abundance of Reactive Oxygen Species] inhibits the reaction [sanguinarine results in increased cleavage of BID protein]	23660334
BID	alantolactone	alantolactone results in increased cleavage of BID protein	22721982
BID	alpinumisoflavone	alpinumisoflavone results in decreased expression of BID protein	23850732
BID	alvocidib	[alvocidib co-treated with ethyl 2-amino-6-bromo-4-(1-cyano-2-ethoxy-2-oxoethyl)-4H-chromene-3-carboxylate] results in increased cleavage of BID protein	15634644
BID	alvocidib	[alvocidib co-treated with TNFSF10 protein] results in decreased expression of BID protein	16951203
BID	alvocidib	alvocidib results in increased cleavage of BID protein	11464216|12170773
BID	alvocidib	BCL2 protein mutant form inhibits the reaction [alvocidib results in increased cleavage of BID protein]	12170773
BID	alvocidib	Boc-D-FMK inhibits the reaction [alvocidib results in increased cleavage of BID protein]	11464216
BID	alvocidib	[imatinib co-treated with alvocidib] results in increased activity of BID protein	12231544
BID	Amiodarone	[TNFSF10 co-treated with Amiodarone] results in increased cleavage of BID protein	21292685
BID	Dextroamphetamine	Dextroamphetamine results in increased expression of BID mRNA	23820845
BID	Dextroamphetamine	Dextroamphetamine results in increased expression of BID protein modified form	23820845
BID	Dextroamphetamine	[N-Methyl-3,4-methylenedioxyamphetamine co-treated with Methamphetamine co-treated with 4-methylthioamphetamine co-treated with Dextroamphetamine] results in increased expression of BID mRNA	23820845
BID	Dextroamphetamine	[N-Methyl-3,4-methylenedioxyamphetamine co-treated with Methamphetamine co-treated with 4-methylthioamphetamine co-treated with Dextroamphetamine] results in increased expression of BID protein modified form	23820845
BID	andrographolide	[andrographolide co-treated with Cisplatin] results in increased expression of BID mRNA	24563380
BID	andrographolide	andrographolide results in increased expression of BID mRNA	24563380
BID	andrographolide	andrographolide results in increased expression of BID protein	24563380
BID	Anisomycin	Anisomycin results in increased cleavage of and results in increased activity of BID protein	18241849
BID	anthra(1,9-cd)pyrazol-6(2H)-one	anthra(1,9-cd)pyrazol-6(2H)-one promotes the reaction [arsenic trioxide results in increased cleavage of BID protein]	16972261
BID	Arachidonic Acid	Arachidonic Acid results in increased cleavage of BID protein	19720122
BID	Arachidonic Acid	FADD protein promotes the reaction [Arachidonic Acid results in increased cleavage of BID protein]	19720122
BID	Arsenic	Arsenic results in increased expression of BID mRNA	19945496
BID	arsenic trioxide	anthra(1,9-cd)pyrazol-6(2H)-one promotes the reaction [arsenic trioxide results in increased cleavage of BID protein]	16972261
BID	arsenic trioxide	arsenic trioxide affects the cleavage of BID protein	15131059
BID	arsenic trioxide	[arsenic trioxide co-treated with esculetin] results in increased cleavage of BID protein	19428345
BID	arsenic trioxide	[arsenic trioxide co-treated with lonidamine] results in increased cleavage of and results in increased activity of BID protein	21889928
BID	arsenic trioxide	[arsenic trioxide co-treated with Quercetin] results in increased cleavage of BID protein	18359480
BID	arsenic trioxide	[arsenic trioxide co-treated with TNF protein] results in increased cleavage of and results in increased activity of BID protein	17673311
BID	arsenic trioxide	arsenic trioxide results in decreased expression of BID protein	21418039
BID	arsenic trioxide	arsenic trioxide results in increased activity of BID protein	20605902
BID	arsenic trioxide	arsenic trioxide results in increased cleavage of and results in increased activity of BID protein	12851490|15665116|18546268|23041229
BID	arsenic trioxide	arsenic trioxide results in increased cleavage of BID protein	10648417|19364129
BID	arsenic trioxide	Curcumin promotes the reaction [arsenic trioxide results in increased activity of BID protein]	20605902
BID	arsenic trioxide	Deoxyglucose promotes the reaction [arsenic trioxide results in increased cleavage of and results in increased activity of BID protein]	23041229
BID	arsenic trioxide	Genistein promotes the reaction [arsenic trioxide results in increased cleavage of and results in increased activity of BID protein]	18546268
BID	arsenic trioxide	TP53 protein inhibits the reaction [arsenic trioxide results in increased cleavage of and results in increased activity of BID protein]	12851490
BID	arsenic trioxide	U 0126 promotes the reaction [arsenic trioxide results in increased cleavage of BID protein]	16972261
BID	Aspirin	[Aspirin co-treated with TNFSF10 protein] results in increased cleavage of BID protein	18483385
BID	Aspirin	Aspirin results in increased cleavage of BID protein	15976387
BID	Aspirin	CASP8 affects the reaction [Aspirin results in increased cleavage of BID protein]	15976387
BID	azadirachtin	azadirachtin results in increased expression of BID mRNA	20429769
BID	benzo(a)pyrene 7,8-dihydrodiol	benzo(a)pyrene 7,8-dihydrodiol results in decreased expression of BID protein	15698582
BID	benzo(a)pyrene diolepoxide I	benzo(a)pyrene diolepoxide I results in decreased expression of BID protein	15698582
BID	Benzo(a)pyrene	Benzo(a)pyrene results in decreased expression of BID protein	15698582
BID	Benzo(a)pyrene	Benzo(a)pyrene results in increased expression of BID protein	16041517
BID	Benzo(a)pyrene	Nitrogen Oxides inhibits the reaction [Benzo(a)pyrene results in increased expression of BID protein]	16041517
BID	benzoylcarbonyl-valyl-aspartyl-valyl-alanyl-aspartyl-fluoromethyl ketone	benzoylcarbonyl-valyl-aspartyl-valyl-alanyl-aspartyl-fluoromethyl ketone inhibits the reaction [silybin results in increased cleavage of BID protein]	16777994
BID	benzyloxycarbonyl-isoleucyl-glutamyl-threonyl-aspartic acid fluoromethyl ketone	benzyloxycarbonyl-isoleucyl-glutamyl-threonyl-aspartic acid fluoromethyl ketone inhibits the reaction [nimesulide results in increased cleavage of and results in increased activity of BID protein]	19360361
BID	benzyloxycarbonyl-isoleucyl-glutamyl-threonyl-aspartic acid fluoromethyl ketone	benzyloxycarbonyl-isoleucyl-glutamyl-threonyl-aspartic acid fluoromethyl ketone inhibits the reaction [N,N-dimethylphytosphingosine results in increased cleavage of BID protein]	19481559
BID	benzyloxycarbonyl-leucyl-glutamyl-histidyl-aspartic acid fluoromethyl ketone	benzyloxycarbonyl-leucyl-glutamyl-histidyl-aspartic acid fluoromethyl ketone inhibits the reaction [rubimaillin results in increased cleavage of BID protein]	19716835
BID	benzyloxycarbonyl-valyl-alanyl-aspartic acid	benzyloxycarbonyl-valyl-alanyl-aspartic acid analog inhibits the reaction [Lithocholic Acid results in increased cleavage of and results in increased activity of BID protein]	19054763
BID	berbamine	berbamine results in decreased expression of BID protein	19960011
BID	Estradiol	Estradiol inhibits the reaction [Etoposide results in increased expression of BID mRNA]	19426747
BID	Estradiol	Estradiol results in decreased expression of BID mRNA	19426747
BID	Estradiol	Estradiol results in increased expression of BID mRNA	20106945
BID	bisphenol A	bisphenol A results in decreased methylation of BID gene	22576693
BID	bisphenol A	bisphenol A results in increased expression of BID mRNA	22576693
BID	Boc-D-FMK	Boc-D-FMK inhibits the reaction [alvocidib results in increased cleavage of BID protein]	11464216
BID	bortezomib	[bortezomib co-treated with Butyrates] results in decreased expression of BID protein	12893773
BID	bortezomib	[bortezomib co-treated with TNFSF10 protein] results in increased cleavage of BID protein	19261616
BID	bortezomib	[bortezomib co-treated with vorinostat] results in decreased expression of BID protein	12893773
BID	bortezomib	bortezomib promotes the reaction [TNFSF10 protein results in increased cleavage of BID protein]	12902978
BID	bortezomib	bortezomib results in increased cleavage of BID protein	17898295
BID	bortezomib	[bortezomib results in increased susceptibility to and results in increased activity of TNFSF10 protein] which results in increased cleavage of BID protein	17326159
BID	bortezomib	[TNFSF10 protein co-treated with bortezomib] results in increased cleavage of BID protein	15930312
BID	bortezomib	[vorinostat co-treated with bortezomib] results in increased cleavage of BID protein	17351739
BID	brassinolide	brassinolide results in decreased expression of BID protein	20833159
BID	Butyrates	[bortezomib co-treated with Butyrates] results in decreased expression of BID protein	12893773
BID	cadmium acetate	Acetylcysteine inhibits the reaction [cadmium acetate results in increased cleavage of BID protein]	16169029
BID	cadmium acetate	cadmium acetate results in increased cleavage of and results in increased localization of BID protein	16169029
BID	cadmium acetate	cadmium acetate results in increased cleavage of BID protein	15450950|16169029
BID	cadmium acetate	CASP8 affects the reaction [cadmium acetate results in increased cleavage of BID protein]	15450950|16169029
BID	cadmium acetate	isoleucyl-glutamyl-threonyl-aspartic acid fluoromethyl ketone analog inhibits the reaction [cadmium acetate results in increased cleavage of BID protein]	15450950|16169029
BID	Cadmium Chloride	Cadmium Chloride results in decreased expression of BID mRNA	21457566
BID	Cadmium Chloride	Cadmium Chloride results in increased expression of BID	21787858
BID	Caffeine	Caffeine inhibits the reaction [silybin results in increased cleavage of BID protein]	16777994
BID	Camptothecin	[Camptothecin co-treated with 3-(5'-hydroxymethyl-2'-furyl)-1-benzylindazole] results in increased cleavage of and results in decreased expression of BID protein	19481069
BID	Camptothecin	[Camptothecin co-treated with FAS protein] results in increased cleavage of BID protein	19633536
BID	Camptothecin	Camptothecin results in increased cleavage of and results in decreased expression of BID protein	19481069
BID	Capsaicin	Capsaicin promotes the reaction [TNFSF10 results in increased cleavage of BID protein]	22200406
BID	Capsaicin	Capsaicin results in increased cleavage of BID protein	19502594
BID	Capsaicin	Capsaicin results in increased expression of BID mRNA	19502594
BID	carboxycinnamic acid bishydroxamide	carboxycinnamic acid bishydroxamide results in increased cleavage of BID protein	15897598
BID	Catechin	Catechin results in increased cleavage of and results in increased activity of BID protein	20206613
BID	celecoxib	[ABT-737 co-treated with celecoxib] results in increased cleavage of BID protein	20104024
BID	celecoxib	celecoxib results in increased cleavage of BID protein	15197583
BID	celecoxib	TNFSF10 protein promotes the reaction [celecoxib results in increased cleavage of BID protein]	15572759
BID	ciglitazone	DDIT3 mutant form inhibits the reaction [[Niflumic Acid co-treated with ciglitazone] results in increased cleavage of BID protein]	21067863
BID	ciglitazone	[Niflumic Acid co-treated with ciglitazone] results in increased cleavage of BID protein	21067863
BID	cinnamic aldehyde	cinnamic aldehyde results in increased cleavage of BID protein	15964311
BID	cinobufotalin	cinobufotalin results in increased activity of BID protein	22898211
BID	clavulone II	clavulone II results in increased cleavage of BID protein	15920677
BID	cobaltous chloride	cobaltous chloride results in decreased expression of BID mRNA	19320972
BID	codonoposide	codonoposide results in increased cleavage of and affects the localization of BID protein	15863893
BID	Copper	[NSC 689534 binds to Copper] which results in decreased expression of BID mRNA	20971185
BID	cordycepin	Acetylcysteine inhibits the reaction [cordycepin results in decreased expression of BID protein]	21310227
BID	cordycepin	cordycepin results in decreased expression of BID protein	21310227
BID	cupric chloride	cupric chloride results in increased expression of BID mRNA	17211630
BID	Curcumin	Curcumin promotes the reaction [arsenic trioxide results in increased activity of BID protein]	20605902
BID	Cycloheximide	[Cycloheximide co-treated with TNF] results in increased cleavage of BID protein	12925536
BID	Cycloheximide	Cycloheximide inhibits the reaction [vorinostat results in increased cleavage of BID protein]	11535817
BID	Cycloheximide	ITPK1 inhibits the reaction [[Cycloheximide co-treated with TNF] results in increased cleavage of BID protein]	12925536
BID	Cycloheximide	ITPK1 mutant form promotes the reaction [[Cycloheximide co-treated with TNF protein] results in increased cleavage of BID protein]	12925536
BID	Cyclosporine	Cyclosporine results in increased expression of BID mRNA	20106945
BID	cylindrospermopsin	cylindrospermopsin results in decreased expression of BID mRNA	23726867
BID	Cytarabine	[Cytarabine co-treated with TNFSF10 protein] results in increased expression of BID protein	12780785
BID	Dactinomycin	Dactinomycin inhibits the reaction [vorinostat results in increased cleavage of BID protein]	11535817
BID	danthron	danthron results in increased expression of BID protein	21126053
BID	Daunorubicin	[Daunorubicin co-treated with TNFSF10 protein] results in increased expression of BID protein	12780785
BID	decitabine	decitabine affects the expression of BID mRNA	23300844
BID	decitabine	[Valproic Acid co-treated with decitabine] results in increased cleavage of BID protein	21771726
BID	Deoxyglucose	Deoxyglucose promotes the reaction [arsenic trioxide results in increased cleavage of and results in increased activity of BID protein]	23041229
BID	Deoxyglucose	Deoxyglucose results in increased cleavage of and results in increased activity of BID protein	23041229
BID	deoxynivalenol	deoxynivalenol results in decreased expression of BID mRNA	22269384
BID	destruxin B	destruxin B results in increased cleavage of BID protein	23751424
BID	destruxin B	destruxin B results in increased expression of BID protein alternative form	23751424
BID	Cisplatin	Acetylcysteine inhibits the reaction [[Cisplatin co-treated with FASLG protein] results in decreased expression of BID protein]	17574045
BID	Cisplatin	[andrographolide co-treated with Cisplatin] results in increased expression of BID mRNA	24563380
BID	Cisplatin	Cisplatin affects the expression of BID mRNA	23300844
BID	Cisplatin	[Cisplatin co-treated with FASLG protein] results in decreased expression of BID protein	17574045
BID	Cisplatin	[Cisplatin co-treated with fisetin] results in increased cleavage of BID protein	21216935
BID	Cisplatin	[Cisplatin co-treated with pemetrexed] results in increased cleavage of BID protein	19351772
BID	Cisplatin	Cisplatin inhibits the reaction [CASP8 protein results in increased cleavage of BID protein]	19590723
BID	Cisplatin	Cisplatin results in increased activity of BID protein	21052098|21527773
BID	Cisplatin	[TNFSF10 protein co-treated with Cisplatin] results in increased cleavage of BID protein	21252285
BID	Dichlorodiphenyl Dichloroethylene	Dichlorodiphenyl Dichloroethylene results in increased cleavage of BID protein	19545618
BID	Diclofenac	1,2-bis(2-aminophenoxy)ethane-N,N,N',N'-tetraacetic acid inhibits the reaction [Diclofenac results in increased activity of BID protein]	18191430
BID	Diclofenac	Diclofenac results in increased activity of BID protein	18191430
BID	Doxorubicin	2-(4-morpholinyl)-8-phenyl-4H-1-benzopyran-4-one promotes the reaction [Doxorubicin results in increased cleavage of and results in increased activity of and results in increased localization of BID protein]	20856197
BID	Doxorubicin	BCL2L1 protein inhibits the reaction [BID protein results in increased susceptibility to Doxorubicin]	15289866
BID	Doxorubicin	BCL2 protein inhibits the reaction [2-(4-morpholinyl)-8-phenyl-4H-1-benzopyran-4-one promotes the reaction [Doxorubicin results in increased cleavage of and results in increased activity of and results in increased localization of BID protein]]	20856197
BID	Doxorubicin	BCL2 protein inhibits the reaction [PI103 promotes the reaction [Doxorubicin results in increased cleavage of and results in increased activity of and results in increased localization of BID protein]]	20856197
BID	Doxorubicin	BID protein results in increased susceptibility to Doxorubicin	15289866
BID	Doxorubicin	Doxorubicin affects the cleavage of BID protein	15870702
BID	Doxorubicin	[Doxorubicin co-treated with Phellinus linteus extract] results in increased cleavage of BID protein	16868541
BID	Doxorubicin	Doxorubicin results in decreased expression of BID mRNA	16705698
BID	Doxorubicin	Doxorubicin results in increased cleavage of and results in increased activity of and results in increased localization of BID protein	20856197
BID	Doxorubicin	[Indomethacin results in increased cleavage of BID protein] which results in increased susceptibility to Doxorubicin	15812552
BID	Doxorubicin	PI103 promotes the reaction [Doxorubicin results in increased cleavage of and results in increased activity of and results in increased localization of BID protein]	20856197
BID	Drugs, Chinese Herbal	[Drugs, Chinese Herbal co-treated with necrostatin-1] results in increased expression of BID protein modified form	23811387
BID	Drugs, Chinese Herbal	Drugs, Chinese Herbal results in increased expression of BID protein modified form	23811387
BID	echinocystic acid	echinocystic acid analog results in increased cleavage of and affects the localization of BID protein	15863893
BID	ellipticine	ellipticine results in decreased expression of and results in increased cleavage of BID protein	21843585
BID	esculetin	[arsenic trioxide co-treated with esculetin] results in increased cleavage of BID protein	19428345
BID	ethyl 2-amino-6-bromo-4-(1-cyano-2-ethoxy-2-oxoethyl)-4H-chromene-3-carboxylate	[alvocidib co-treated with ethyl 2-amino-6-bromo-4-(1-cyano-2-ethoxy-2-oxoethyl)-4H-chromene-3-carboxylate] results in increased cleavage of BID protein	15634644
BID	Etoposide	CASP9 mutant form inhibits the reaction [Etoposide results in increased cleavage of BID protein]	21801448
BID	Etoposide	Estradiol inhibits the reaction [Etoposide results in increased expression of BID mRNA]	19426747
BID	Etoposide	Etoposide results in increased cleavage of BID protein	21801448
BID	Etoposide	Etoposide results in increased expression of BID mRNA	19426747
BID	fisetin	[Cisplatin co-treated with fisetin] results in increased cleavage of BID protein	21216935
BID	fisetin	fisetin results in increased cleavage of BID protein	21216935
BID	fludarabine	[fludarabine co-treated with TNFSF10 protein] results in increased expression of BID protein	12780785
BID	fludarabine	[LAQ824 co-treated with fludarabine] results in increased activity of BID protein	18852132
BID	Fluorouracil	BCL2L1 protein inhibits the reaction [BID protein results in increased susceptibility to Fluorouracil]	15289866
BID	Fluorouracil	BID protein mutant form results in decreased susceptibility to Fluorouracil	15095271
BID	Fluorouracil	BID protein results in increased susceptibility to Fluorouracil	15289866
BID	Fluorouracil	[Fluorouracil co-treated with irinotecan co-treated with vorinostat] results in increased cleavage of BID protein	15754201
BID	Fluorouracil	Fluorouracil results in decreased expression of BID protein	15754201
BID	Fluorouracil	Fluorouracil results in increased cleavage of and results in increased activity of BID protein	21474236
BID	Fluorouracil	IFNA1 promotes the reaction [Fluorouracil results in increased cleavage of and results in increased activity of BID protein]	21474236
BID	garcinol	garcinol results in increased cleavage of BID protein	16052481
BID	gemcitabine	gemcitabine results in increased cleavage of BID protein	14750167
BID	Genistein	[Genistein co-treated with TNFSF10 protein] results in increased cleavage of BID protein	19497411
BID	Genistein	Genistein promotes the reaction [arsenic trioxide results in increased cleavage of and results in increased activity of BID protein]	18546268
BID	Genistein	Genistein results in increased cleavage of and results in increased activity of BID protein	18546268
BID	Heterocyclic Compounds	[Heterocyclic Compounds binds to Thiazoles] which results in decreased expression of BID protein	19014919
BID	homocastasterone	homocastasterone results in decreased expression of BID protein	20833159
BID	Fenretinide	[Fenretinide co-treated with TNFSF10 protein] results in increased cleavage of BID protein	17273769
BID	hyperforin dicyclohexylammonium	hyperforin dicyclohexylammonium results in increased expression of BID protein	21376709
BID	imatinib	[imatinib co-treated with alvocidib] results in increased activity of BID protein	12231544
BID	indioside D	indioside D results in increased cleavage of BID protein	18376857
BID	Indomethacin	Indomethacin results in increased cleavage of BID protein	15812552
BID	Indomethacin	[Indomethacin results in increased cleavage of BID protein] which results in increased susceptibility to Doxorubicin	15812552
BID	irinotecan	[Fluorouracil co-treated with irinotecan co-treated with vorinostat] results in increased cleavage of BID protein	15754201
BID	irinotecan	irinotecan results in decreased expression of BID protein	15754201
BID	isoleucyl-glutamyl-threonyl-aspartic acid fluoromethyl ketone	isoleucyl-glutamyl-threonyl-aspartic acid fluoromethyl ketone analog inhibits the reaction [cadmium acetate results in increased cleavage of BID protein]	15450950|16169029
BID	LAQ824	[LAQ824 co-treated with fludarabine] results in increased activity of BID protein	18852132
BID	Lipopolysaccharides	Lipopolysaccharides results in increased expression of BID protein	19675143
BID	Lithocholic Acid	benzyloxycarbonyl-valyl-alanyl-aspartic acid analog inhibits the reaction [Lithocholic Acid results in increased cleavage of and results in increased activity of BID protein]	19054763
BID	Lithocholic Acid	[[[Lithocholic Acid results in increased abundance of Reactive Oxygen Species] which results in increased localization of and results in increased activity of FAS protein] which results in increased activity of CASP8 protein] which results in increased cleavage of BID protein	19054763
BID	Lithocholic Acid	[[[[Lithocholic Acid results in increased abundance of Reactive Oxygen Species] which results in increased localization of and results in increased activity of FAS protein] which results in increased activity of CASP8 protein] which results in increased cleavage of BID protein] which results in increased activity of CASP9 protein	19054763
BID	Lithocholic Acid	[[[[[Lithocholic Acid results in increased abundance of Reactive Oxygen Species] which results in increased localization of and results in increased activity of FAS protein] which results in increased activity of CASP8 protein] which results in increased cleavage of BID protein] which results in increased activity of CASP9 protein] which results in increased activity of CASP3 protein	19054763
BID	Lithocholic Acid	Lithocholic Acid results in increased cleavage of BID protein	19054763
BID	lonidamine	[arsenic trioxide co-treated with lonidamine] results in increased cleavage of and results in increased activity of BID protein	21889928
BID	lonidamine	lonidamine results in increased activity of BID protein	20605902
BID	Masoprocol	[Masoprocol co-treated with TNFSF10 protein] results in increased cleavage of and results in increased activity of BID protein	17645780
BID	Melatonin	Melatonin promotes the reaction [BID protein binds to BAX protein]	19552762
BID	Melatonin	Melatonin results in increased expression of BID protein	19552762
BID	Methamphetamine	Methamphetamine results in increased expression of BID mRNA	23820845
BID	Methamphetamine	Methamphetamine results in increased expression of BID protein modified form	23820845
BID	Methamphetamine	[N-Methyl-3,4-methylenedioxyamphetamine co-treated with Methamphetamine co-treated with 4-methylthioamphetamine co-treated with Dextroamphetamine] results in increased expression of BID mRNA	23820845
BID	Methamphetamine	[N-Methyl-3,4-methylenedioxyamphetamine co-treated with Methamphetamine co-treated with 4-methylthioamphetamine co-treated with Dextroamphetamine] results in increased expression of BID protein modified form	23820845
BID	methyl 5-chloro-4,5-didehydrojasmonate	methyl 5-chloro-4,5-didehydrojasmonate results in decreased expression of BID protein	20696234
BID	Methyl Methanesulfonate	Methyl Methanesulfonate results in decreased expression of BID mRNA	23649840
BID	N-Methyl-3,4-methylenedioxyamphetamine	[N-Methyl-3,4-methylenedioxyamphetamine co-treated with Methamphetamine co-treated with 4-methylthioamphetamine co-treated with Dextroamphetamine] results in increased expression of BID mRNA	23820845
BID	N-Methyl-3,4-methylenedioxyamphetamine	[N-Methyl-3,4-methylenedioxyamphetamine co-treated with Methamphetamine co-treated with 4-methylthioamphetamine co-treated with Dextroamphetamine] results in increased expression of BID protein modified form	23820845
BID	N-Methyl-3,4-methylenedioxyamphetamine	N-Methyl-3,4-methylenedioxyamphetamine results in increased expression of BID mRNA	23820845
BID	N-Methyl-3,4-methylenedioxyamphetamine	N-Methyl-3,4-methylenedioxyamphetamine results in increased expression of BID protein modified form	23820845
BID	Mifepristone	Mifepristone results in increased expression of BID mRNA	17584828
BID	monomethylarsonous acid	monomethylarsonous acid results in increased expression of BID mRNA	19945496|20886546
BID	Naphthoquinones	[Naphthoquinones co-treated with necrostatin-1] results in increased expression of BID protein modified form	23811387
BID	Naphthoquinones	Naphthoquinones results in increased expression of BID protein modified form	23811387
BID	necrostatin-1	[Drugs, Chinese Herbal co-treated with necrostatin-1] results in increased expression of BID protein modified form	23811387
BID	necrostatin-1	[Naphthoquinones co-treated with necrostatin-1] results in increased expression of BID protein modified form	23811387
BID	nickel sulfate	nickel sulfate results in increased expression of BID mRNA	16780908
BID	Niflumic Acid	DDIT3 mutant form inhibits the reaction [[Niflumic Acid co-treated with ciglitazone] results in increased cleavage of BID protein]	21067863
BID	Niflumic Acid	[Niflumic Acid co-treated with ciglitazone] results in increased cleavage of BID protein	21067863
BID	nimbolide	nimbolide results in increased expression of BID mRNA	20429769
BID	nimesulide	benzyloxycarbonyl-isoleucyl-glutamyl-threonyl-aspartic acid fluoromethyl ketone inhibits the reaction [nimesulide results in increased cleavage of and results in increased activity of BID protein]	19360361
BID	nimesulide	nimesulide results in increased cleavage of and results in increased activity of BID protein	19360361
BID	Nitric Oxide	Nitric Oxide results in increased cleavage of BID protein	15126337
BID	Nitrogen Oxides	Nitrogen Oxides inhibits the reaction [Benzo(a)pyrene results in increased expression of BID protein]	16041517
BID	N,N-dimethylphytosphingosine	benzyloxycarbonyl-isoleucyl-glutamyl-threonyl-aspartic acid fluoromethyl ketone inhibits the reaction [N,N-dimethylphytosphingosine results in increased cleavage of BID protein]	19481559
BID	N,N-dimethylphytosphingosine	N,N-dimethylphytosphingosine results in increased cleavage of BID protein	19481559
BID	NSC 689534	[NSC 689534 binds to Copper] which results in decreased expression of BID mRNA	20971185
BID	Paclitaxel	Paclitaxel results in increased cleavage of BID protein	18098270
BID	Paclitaxel	Paclitaxel results in increased expression of BID protein	14749477
BID	Paclitaxel	[Tretinoin co-treated with Paclitaxel] results in increased cleavage of BID protein	18098270
BID	panduratin A	panduratin A results in decreased expression of BID protein	16497706
BID	Paraquat	Paraquat results in decreased expression of BID mRNA	18836921
BID	parthenolide	parthenolide results in increased cleavage of BID protein	16024633
BID	Particulate Matter	Particulate Matter results in increased expression of BID protein	19675143
BID	Patulin	Patulin results in increased expression of BID mRNA	21844328
BID	pemetrexed	[Cisplatin co-treated with pemetrexed] results in increased cleavage of BID protein	19351772
BID	Pentoxifylline	Pentoxifylline promotes the reaction [TNFSF10 protein results in increased cleavage of BID protein]	20804743
BID	Phellinus linteus extract	[Doxorubicin co-treated with Phellinus linteus extract] results in increased cleavage of BID protein	16868541
BID	phenethyl isothiocyanate	phenethyl isothiocyanate results in increased expression of and results in increased cleavage of BID protein	16054126
BID	phenoxodiol	phenoxodiol results in increased activity of BID protein	16388521
BID	PI103	BCL2 protein inhibits the reaction [PI103 promotes the reaction [Doxorubicin results in increased cleavage of and results in increased activity of and results in increased localization of BID protein]]	20856197
BID	PI103	PI103 promotes the reaction [Doxorubicin results in increased cleavage of and results in increased activity of and results in increased localization of BID protein]	20856197
BID	pifithrin	pifithrin inhibits the reaction [silybin results in increased cleavage of BID protein]	16777994
BID	Plant Extracts	Plant Extracts inhibits the reaction [TNFSF10 protein results in decreased expression of BID protein]	20971099
BID	Plant Extracts	Plant Extracts results in increased cleavage of and results in increased activity of BID protein	24021570
BID	Plant Extracts	Plant Extracts results in increased cleavage of BID protein	17619071|19497414
BID	Plant Extracts	Plant Extracts results in increased expression of BID protein alternative form	20229524
BID	Poly I-C	Poly I-C results in decreased expression of BID protein	21418039
BID	Polyphenols	Polyphenols results in increased cleavage of and results in increased activity of BID protein	24021570
BID	polyphenon E	polyphenon E results in increased cleavage of BID protein	23285096
BID	pramanicin	pramanicin analog results in increased cleavage of BID protein	23441183
BID	pregna-4,17-diene-3,16-dione	pregna-4,17-diene-3,16-dione results in increased cleavage of BID protein	17475222
BID	Progesterone	Progesterone results in decreased expression of BID mRNA	18037150
BID	pyrithione zinc	pyrithione zinc results in increased cleavage of BID protein	20151177
BID	Quercetin	[arsenic trioxide co-treated with Quercetin] results in increased cleavage of BID protein	18359480
BID	Quercetin	Quercetin promotes the reaction [TNFSF10 protein results in decreased expression of BID protein]	23711929
BID	Quercetin	Quercetin promotes the reaction [TNFSF10 protein results in increased cleavage of BID protein]	17876056
BID	quercetin 3-O-beta-(2''-galloyl)-rhamnopyranoside	quercetin 3-O-beta-(2''-galloyl)-rhamnopyranoside inhibits the reaction [TNFSF10 protein results in decreased expression of BID protein]	23711929
BID	Reactive Oxygen Species	[Acetylcysteine results in decreased abundance of Reactive Oxygen Species] inhibits the reaction [sanguinarine results in increased cleavage of BID protein]	23660334
BID	Reactive Oxygen Species	[[[Lithocholic Acid results in increased abundance of Reactive Oxygen Species] which results in increased localization of and results in increased activity of FAS protein] which results in increased activity of CASP8 protein] which results in increased cleavage of BID protein	19054763
BID	Reactive Oxygen Species	[[[[Lithocholic Acid results in increased abundance of Reactive Oxygen Species] which results in increased localization of and results in increased activity of FAS protein] which results in increased activity of CASP8 protein] which results in increased cleavage of BID protein] which results in increased activity of CASP9 protein	19054763
BID	Reactive Oxygen Species	[[[[[Lithocholic Acid results in increased abundance of Reactive Oxygen Species] which results in increased localization of and results in increased activity of FAS protein] which results in increased activity of CASP8 protein] which results in increased cleavage of BID protein] which results in increased activity of CASP9 protein] which results in increased activity of CASP3 protein	19054763
BID	resveratrol	[resveratrol co-treated with TNFSF10 protein] results in increased cleavage of BID protein	20097879
BID	resveratrol	resveratrol results in decreased expression of BID protein	20717957
BID	resveratrol	[resveratrol results in increased activity of CASP8 protein] which results in increased cleavage of BID protein	18276737|19423619
BID	resveratrol	resveratrol results in increased cleavage of BID protein	16617056|19423619
BID	resveratrol	resveratrol results in increased expression of BID protein	16731767
BID	resveratrol	resveratrol results in increased localization of BID protein	19561642
BID	resveratrol	[TNFSF10 protein co-treated with resveratrol] results in increased cleavage of BID protein	18222423
BID	rubimaillin	BCL2L1 protein inhibits the reaction [rubimaillin results in increased cleavage of BID protein]	19716835
BID	rubimaillin	benzyloxycarbonyl-leucyl-glutamyl-histidyl-aspartic acid fluoromethyl ketone inhibits the reaction [rubimaillin results in increased cleavage of BID protein]	19716835
BID	rubimaillin	rubimaillin results in increased cleavage of BID protein	19716835
BID	Safrole	Safrole results in increased expression of BID protein	21591240
BID	sanguinarine	[Acetylcysteine results in decreased abundance of Reactive Oxygen Species] inhibits the reaction [sanguinarine results in increased cleavage of BID protein]	23660334
BID	sanguinarine	sanguinarine results in increased cleavage of BID protein	23660334
BID	Selenium	Selenium results in increased cleavage of BID protein	12432279
BID	Silver	Silver results in increased expression of BID mRNA	21611810
BID	silybin	benzoylcarbonyl-valyl-aspartyl-valyl-alanyl-aspartyl-fluoromethyl ketone inhibits the reaction [silybin results in increased cleavage of BID protein]	16777994
BID	silybin	Caffeine inhibits the reaction [silybin results in increased cleavage of BID protein]	16777994
BID	silybin	pifithrin inhibits the reaction [silybin results in increased cleavage of BID protein]	16777994
BID	silybin	silybin affects the localization of BID protein modified form	16777994
BID	silybin	silybin results in increased cleavage of BID protein	16777994
BID	Sirolimus	[7-hydroxystaurosporine co-treated with Sirolimus] results in increased cleavage of BID protein	15767555
BID	sodium arsenite	sodium arsenite results in increased expression of BID mRNA	20886546
BID	sorafenib	[sorafenib co-treated with TNFSF10 protein] promotes the reaction [CASP8 protein modified form results in increased cleavage of BID protein]	17909059
BID	sorafenib	[sorafenib co-treated with TNFSF10 protein] results in increased cleavage of BID protein	17909059
BID	sorafenib	[sorafenib co-treated with Vitamin K 1] results in increased cleavage of BID protein	20301194
BID	Staurosporine	Staurosporine promotes the reaction [BID protein binds to BAX protein]	19552762
BID	Staurosporine	Staurosporine results in increased expression of BID protein	19552762
BID	suillin	suillin results in decreased expression of BID protein	19616521
BID	sulindac sulfide	sulindac sulfide results in increased cleavage of BID protein	12203115
BID	Tamoxifen	[Tamoxifen co-treated with TNFSF10 protein] results in increased cleavage of BID protein	17767197
BID	Taurine	Taurine results in decreased expression of BID mRNA	16579726
BID	tcdA protein, Clostridium difficile	tcdA protein, Clostridium difficile results in increased cleavage of BID protein	16368960
BID	Thiazoles	[Heterocyclic Compounds binds to Thiazoles] which results in decreased expression of BID protein	19014919
BID	thiosulfinic acids	thiosulfinic acids results in increased cleavage of BID protein	19446247
BID	Topotecan	BID protein affects the susceptibility to Topotecan	16217747
BID	Tretinoin	[Tretinoin co-treated with Paclitaxel] results in increased cleavage of BID protein	18098270
BID	Tretinoin	Tretinoin results in decreased expression of BID mRNA	23724009
BID	Tretinoin	Tretinoin results in decreased expression of BID protein	16242776
BID	trichostatin A	trichostatin A promotes the reaction [CASP9 protein affects the localization of BID protein]	12556448
BID	U 0126	U 0126 promotes the reaction [arsenic trioxide results in increased cleavage of BID protein]	16972261
BID	Valproic Acid	[Valproic Acid co-treated with decitabine] results in increased cleavage of BID protein	21771726
BID	Valproic Acid	Valproic Acid results in decreased expression of BID mRNA	23179753
BID	Valproic Acid	Valproic Acid results in increased cleavage of BID protein	19351772
BID	Valproic Acid	Valproic Acid results in increased expression of BID mRNA	22814014
BID	Vitamin K 1	[sorafenib co-treated with Vitamin K 1] results in increased cleavage of BID protein	20301194
BID	vorinostat	[bortezomib co-treated with vorinostat] results in decreased expression of BID protein	12893773
BID	vorinostat	Cycloheximide inhibits the reaction [vorinostat results in increased cleavage of BID protein]	11535817
BID	vorinostat	Dactinomycin inhibits the reaction [vorinostat results in increased cleavage of BID protein]	11535817
BID	vorinostat	[Fluorouracil co-treated with irinotecan co-treated with vorinostat] results in increased cleavage of BID protein	15754201
BID	vorinostat	TNFSF10 protein promotes the reaction [vorinostat results in increased cleavage of BID protein]	17410615
BID	vorinostat	[vorinostat co-treated with bortezomib] results in increased cleavage of BID protein	17351739
BID	vorinostat	[vorinostat co-treated with TNFSF10 protein] results in increased cleavage of BID protein	19643600
BID	vorinostat	vorinostat results in increased cleavage of BID protein	11535817|11979447|15897598|17351739|17410615|18025281
BID	vorinostat	vorinostat results in increased expression of BID protein	20543569
BID	zoledronic acid	zoledronic acid results in increased expression of BID mRNA	19036117
BIRC3	15-deoxy-delta(12,14)-prostaglandin J2	15-deoxy-delta(12,14)-prostaglandin J2 results in decreased expression of BIRC3 protein	15498850
BIRC3	1'-acetoxychavicol acetate	1'-acetoxychavicol acetate inhibits the reaction [TNF protein results in increased expression of BIRC3 protein]	15905586
BIRC3	1L-6-hydroxymethyl-chiro-inositol 2(R)-2-O-methyl-3-O-octadecylcarbonate	1L-6-hydroxymethyl-chiro-inositol 2(R)-2-O-methyl-3-O-octadecylcarbonate results in decreased expression of BIRC3 protein	12970779
BIRC3	1-nitropyrene	1-nitropyrene results in increased expression of BIRC3 mRNA	21540303
BIRC3	2-(4-morpholinyl)-8-phenyl-4H-1-benzopyran-4-one	2-(4-morpholinyl)-8-phenyl-4H-1-benzopyran-4-one inhibits the reaction [Acrolein results in increased expression of BIRC3 protein]	19596284
BIRC3	2-(4-morpholinyl)-8-phenyl-4H-1-benzopyran-4-one	2-(4-morpholinyl)-8-phenyl-4H-1-benzopyran-4-one inhibits the reaction [Thapsigargin results in increased expression of BIRC3 mRNA]	15339911
BIRC3	2-(4-morpholinyl)-8-phenyl-4H-1-benzopyran-4-one	2-(4-morpholinyl)-8-phenyl-4H-1-benzopyran-4-one inhibits the reaction [Thapsigargin results in increased expression of BIRC3 protein]	15339911
BIRC3	2-(4-morpholinyl)-8-phenyl-4H-1-benzopyran-4-one	2-(4-morpholinyl)-8-phenyl-4H-1-benzopyran-4-one results in decreased expression of BIRC3 protein	12970779|14762343
BIRC3	(2E,4E,6E,10E)-3,7,11,15-tetramethyl-2,4,6,10,14-hexadecapentaenoic acid	(2E,4E,6E,10E)-3,7,11,15-tetramethyl-2,4,6,10,14-hexadecapentaenoic acid results in decreased expression of BIRC3 protein	16546985
BIRC3	2-xylene	2-xylene results in increased expression of BIRC3 mRNA	20359517
BIRC3	3-(4-methylphenylsulfonyl)-2-propenenitrile	3-(4-methylphenylsulfonyl)-2-propenenitrile results in decreased expression of BIRC3 mRNA	16380446
BIRC3	3-(4-methylphenylsulfonyl)-2-propenenitrile	3-(4-methylphenylsulfonyl)-2-propenenitrile results in decreased expression of BIRC3 protein	19679660
BIRC3	4-(5-(4-chlorophenyl)-3-(trifluoromethyl)-1H-pyrazol-1-yl)benzenesulfonamide	4-(5-(4-chlorophenyl)-3-(trifluoromethyl)-1H-pyrazol-1-yl)benzenesulfonamide results in decreased expression of BIRC3 protein	12837940
BIRC3	4-aminobenzhydrazide	4-aminobenzhydrazide inhibits the reaction [hydroxyhydroquinone results in increased expression of BIRC3 mRNA]	24530881
BIRC3	4-methylene-2-octyl-5-oxofuran-3-carboxylic acid	4-methylene-2-octyl-5-oxofuran-3-carboxylic acid results in decreased expression of BIRC3 protein	21442130
BIRC3	4-(N-methyl-N-nitrosamino)-1-(3-pyridyl)-1-butanone	4-(N-methyl-N-nitrosamino)-1-(3-pyridyl)-1-butanone results in increased expression of BIRC3 protein	18508827
BIRC3	4-(N-methyl-N-nitrosamino)-1-(3-pyridyl)-1-butanone	SN50 peptide inhibits the reaction [4-(N-methyl-N-nitrosamino)-1-(3-pyridyl)-1-butanone results in increased expression of BIRC3 protein]	18508827
BIRC3	4-(N-methyl-N-nitrosamino)-1-(3-pyridyl)-1-butanone	U 0126 inhibits the reaction [4-(N-methyl-N-nitrosamino)-1-(3-pyridyl)-1-butanone results in increased expression of BIRC3 protein]	18508827
BIRC3	4-(N-methyl-N-nitrosamino)-1-(3-pyridyl)-1-butanone	zinc protoporphyrin analog inhibits the reaction [4-(N-methyl-N-nitrosamino)-1-(3-pyridyl)-1-butanone results in increased expression of BIRC3 protein]	18508827
BIRC3	Acetylcysteine	Acetylcysteine inhibits the reaction [Tosylphenylalanyl Chloromethyl Ketone results in decreased expression of BIRC3 protein]	19679660
BIRC3	aclacinomycins	aclacinomycins results in decreased expression of BIRC3 mRNA	15498119
BIRC3	Acrolein	2-(4-morpholinyl)-8-phenyl-4H-1-benzopyran-4-one inhibits the reaction [Acrolein results in increased expression of BIRC3 protein]	19596284
BIRC3	Acrolein	Acrolein results in increased expression of BIRC3 protein	19596284
BIRC3	Acrolein	Akt-I-1 compound inhibits the reaction [Acrolein results in increased expression of BIRC3 protein]	19596284
BIRC3	Acrolein	wortmannin inhibits the reaction [Acrolein results in increased expression of BIRC3 protein]	19596284
BIRC3	Adenosine	Adenosine results in decreased expression of BIRC3 mRNA	20063052
BIRC3	Aflatoxin B1	Aflatoxin B1 affects the expression of BIRC3 protein	20106945
BIRC3	AG 1879	AG 1879 inhibits the reaction [Oxygen deficiency results in increased expression of BIRC3 mRNA]	17671207
BIRC3	Akt-I-1 compound	Akt-I-1 compound inhibits the reaction [Acrolein results in increased expression of BIRC3 protein]	19596284
BIRC3	allyl disulfide	allyl disulfide results in decreased expression of BIRC3 protein	17647244
BIRC3	allyl sulfide	allyl sulfide results in decreased expression of BIRC3 protein	17647244
BIRC3	alpha-cyano-(3,4-dihydroxy)-N-benzylcinnamide	alpha-cyano-(3,4-dihydroxy)-N-benzylcinnamide inhibits the reaction [CSF3 protein results in increased expression of BIRC3 mRNA]	12393423
BIRC3	alpha-cyano-(3,4-dihydroxy)-N-benzylcinnamide	alpha-cyano-(3,4-dihydroxy)-N-benzylcinnamide inhibits the reaction [CSF3 protein results in increased expression of BIRC3 protein]	12393423
BIRC3	alpha-cyano-(3,4-dihydroxy)-N-benzylcinnamide	alpha-cyano-(3,4-dihydroxy)-N-benzylcinnamide inhibits the reaction [IFNA1 protein results in increased expression of BIRC3 mRNA]	15845643
BIRC3	alpha-cyano-(3,4-dihydroxy)-N-benzylcinnamide	alpha-cyano-(3,4-dihydroxy)-N-benzylcinnamide inhibits the reaction [IFNA1 protein results in increased expression of BIRC3 protein]	15845643
BIRC3	alpha-cyano-(3,4-dihydroxy)-N-benzylcinnamide	alpha-cyano-(3,4-dihydroxy)-N-benzylcinnamide inhibits the reaction [IFNG protein results in increased expression of BIRC3 mRNA]	15845643
BIRC3	alpha-cyano-(3,4-dihydroxy)-N-benzylcinnamide	alpha-cyano-(3,4-dihydroxy)-N-benzylcinnamide inhibits the reaction [IFNG protein results in increased expression of BIRC3 protein]	15845643
BIRC3	alvocidib	alvocidib results in decreased expression of BIRC3 mRNA	12517783
BIRC3	alvocidib	alvocidib results in decreased expression of BIRC3 protein	12517783
BIRC3	alvocidib	Epothilones promotes the reaction [alvocidib results in decreased expression of BIRC3 mRNA]	12517783
BIRC3	alvocidib	Epothilones promotes the reaction [alvocidib results in decreased expression of BIRC3 protein]	12517783
BIRC3	Homocysteine	Homocysteine results in decreased expression of BIRC3 mRNA	19343037
BIRC3	Homocysteine	Homocysteine results in decreased expression of BIRC3 protein	19343037
BIRC3	Homocysteine	Simvastatin inhibits the reaction [Homocysteine results in decreased expression of BIRC3 mRNA]	19343037
BIRC3	Homocysteine	Simvastatin inhibits the reaction [Homocysteine results in decreased expression of BIRC3 protein]	19343037
BIRC3	anacardic acid	anacardic acid inhibits the reaction [TNF protein results in increased expression of BIRC3 protein]	18349320
BIRC3	Apigenin	Apigenin results in increased cleavage of BIRC3 protein	15486995
BIRC3	Arsenic	[Arsenic co-treated with Fluorides] results in decreased expression of BIRC3 mRNA	19962721
BIRC3	arsenic trioxide	arsenic trioxide results in decreased expression of BIRC3 mRNA	19763917
BIRC3	Asbestos, Crocidolite	Asbestos, Crocidolite results in increased expression of BIRC3 mRNA	18687144
BIRC3	Ascorbic Acid	[Quercetin co-treated with Ascorbic Acid] results in increased expression of BIRC3 mRNA	17639512
BIRC3	bendamustine	bendamustine results in decreased expression of BIRC3 protein	12948851
BIRC3	bendamustine	Cladribine promotes the reaction [bendamustine results in decreased expression of BIRC3 protein]	12948851
BIRC3	Benzene	Benzene results in increased expression of BIRC3 mRNA	20359517
BIRC3	Benzo(a)pyrene	Benzo(a)pyrene affects the expression of BIRC3 mRNA	21873647
BIRC3	Benzo(a)pyrene	Benzo(a)pyrene results in decreased expression of BIRC3 mRNA	16120219
BIRC3	Benzo(a)pyrene	Benzo(a)pyrene results in increased expression of BIRC3 mRNA	20064835|20106945|21632981|21871943|22316170
BIRC3	7,8-Dihydro-7,8-dihydroxybenzo(a)pyrene 9,10-oxide	7,8-Dihydro-7,8-dihydroxybenzo(a)pyrene 9,10-oxide results in decreased expression of BIRC3 mRNA	19150397|20382639
BIRC3	benzyloxycarbonylleucyl-leucyl-leucine aldehyde	benzyloxycarbonylleucyl-leucyl-leucine aldehyde inhibits the reaction [Tetradecanoylphorbol Acetate results in increased expression of BIRC3 mRNA]	14527959
BIRC3	Estradiol	Estradiol affects the expression of BIRC3 mRNA	14699072
BIRC3	Estradiol	[Estradiol binds to ESR2 protein] which results in increased expression of BIRC3 mRNA	20404318
BIRC3	Estradiol	[Estradiol co-treated with Progesterone] results in increased expression of BIRC3 mRNA	20660070
BIRC3	Estradiol	Estradiol results in increased expression of BIRC3 mRNA	20106945|23373633
BIRC3	bis(tri-n-butyltin)oxide	bis(tri-n-butyltin)oxide results in increased expression of BIRC3 mRNA	24247028
BIRC3	bortezomib	bortezomib results in decreased expression of BIRC3 protein	17626072
BIRC3	bryostatin 1	bryostatin 1 results in increased expression of BIRC3 mRNA	14527959
BIRC3	Cadmium	Cadmium results in increased expression of BIRC3 mRNA	22562489
BIRC3	caffeic acid phenethyl ester	caffeic acid phenethyl ester results in decreased expression of BIRC3 protein	15291876
BIRC3	Carbon Monoxide	BIRC3 protein inhibits the reaction [NFKBIA protein inhibits the reaction [[HMOX1 protein results in increased chemical synthesis of Carbon Monoxide] which results in decreased susceptibility to TNF protein]]	11880364
BIRC3	Carbon Monoxide	MAPK14 protein affects the reaction [BIRC3 protein inhibits the reaction [NFKBIA protein inhibits the reaction [[HMOX1 protein results in increased chemical synthesis of Carbon Monoxide] which results in decreased susceptibility to TNF protein]]]	11880364
BIRC3	Cladribine	Cladribine promotes the reaction [bendamustine results in decreased expression of BIRC3 protein]	12948851
BIRC3	Cholera Toxin	Cholera Toxin results in increased expression of BIRC3 mRNA	12837940
BIRC3	Cholera Toxin	Cholera Toxin results in increased expression of BIRC3 protein	12837940
BIRC3	cinnamic aldehyde	cinnamic aldehyde results in decreased expression of BIRC3 protein	15566391
BIRC3	cinnamic aldehyde	Vitamin E inhibits the reaction [cinnamic aldehyde results in decreased expression of BIRC3 protein]	15566391
BIRC3	Copper Sulfate	Copper Sulfate results in increased expression of BIRC3 mRNA	19549813
BIRC3	CP 31398	CP 31398 results in decreased expression of BIRC3 mRNA	15155752
BIRC3	cryptolepine	cryptolepine results in decreased expression of BIRC3 mRNA	16120219
BIRC3	Curcumin	[Curcumin co-treated with Doxorubicin] affects the expression of BIRC3 mRNA	15911101
BIRC3	Curcumin	Curcumin inhibits the reaction [Paclitaxel results in increased expression of BIRC3 protein]	16243823
BIRC3	Curcumin	Curcumin inhibits the reaction [TNF protein results in increased expression of BIRC3 mRNA]	16219905
BIRC3	Curcumin	Curcumin results in decreased expression of BIRC3 mRNA	17596214
BIRC3	Curcumin	Curcumin results in decreased expression of BIRC3 protein	19372569
BIRC3	Curcumin	Curcumin results in increased expression of BIRC3 mRNA	15911101|16101141
BIRC3	Cyclosporine	Cyclosporine results in increased expression of BIRC3 mRNA	20106945
BIRC3	Dactinomycin	BIRC3 protein inhibits the reaction [Dactinomycin results in increased susceptibility to TNF protein]	11880364
BIRC3	danthron	danthron results in increased expression of BIRC3 protein	21126053
BIRC3	decitabine	decitabine affects the expression of BIRC3 protein	18636160
BIRC3	dehydroxymethylepoxyquinomicin	dehydroxymethylepoxyquinomicin results in decreased expression of BIRC3 protein	15501958
BIRC3	Demecolcine	Demecolcine results in increased expression of BIRC3 mRNA	23649840
BIRC3	Dexamethasone	Dexamethasone inhibits the reaction [TNF protein results in decreased expression of BIRC3 protein]	11399663
BIRC3	Dexamethasone	Dexamethasone results in increased expression of BIRC3 mRNA	12782123|16144937|9374718
BIRC3	Dexamethasone	Dexamethasone results in increased expression of BIRC3 protein	16144937
BIRC3	Cisplatin	BIRC3 protein results in decreased susceptibility to Cisplatin	14654915
BIRC3	Cisplatin	Cisplatin results in decreased expression of BIRC3 protein	16391810
BIRC3	Calcitriol	Calcitriol results in decreased expression of BIRC3 mRNA	16002434
BIRC3	Calcitriol	Calcitriol results in decreased expression of BIRC3 protein	12479363
BIRC3	Calcitriol	Calcitriol results in increased expression of BIRC3 mRNA	21592394
BIRC3	Calcitriol	[Testosterone co-treated with Calcitriol] results in increased expression of BIRC3 mRNA	21592394
BIRC3	Doxorubicin	BIRC3 protein affects the susceptibility to Doxorubicin	16217747
BIRC3	Doxorubicin	BIRC3 protein results in decreased susceptibility to Doxorubicin	12926068
BIRC3	Doxorubicin	[Curcumin co-treated with Doxorubicin] affects the expression of BIRC3 mRNA	15911101
BIRC3	Doxorubicin	Doxorubicin inhibits the reaction [RELA protein binds to BIRC3 promoter]	15899819
BIRC3	Doxorubicin	Doxorubicin results in decreased expression of BIRC3 mRNA	15899819
BIRC3	Doxorubicin	Doxorubicin results in increased expression of BIRC3 mRNA	16705698|17521628
BIRC3	Doxorubicin	TNF protein inhibits the reaction [Doxorubicin results in decreased expression of BIRC3 mRNA]	15899819
BIRC3	Dust	Dust results in increased expression of BIRC3 mRNA	17805423
BIRC3	epigallocatechin gallate	[potassium chromate(VI) co-treated with epigallocatechin gallate] results in decreased expression of BIRC3 mRNA	22079256
BIRC3	Epothilones	Epothilones promotes the reaction [alvocidib results in decreased expression of BIRC3 mRNA]	12517783
BIRC3	Epothilones	Epothilones promotes the reaction [alvocidib results in decreased expression of BIRC3 protein]	12517783
BIRC3	ethylbenzene	ethylbenzene results in increased expression of BIRC3 mRNA	20359517
BIRC3	Etoposide	BIRC3 protein results in decreased susceptibility to Etoposide	15050749
BIRC3	Etoposide	[Etoposide co-treated with KN 62] results in decreased expression of BIRC3 protein	14666661
BIRC3	Etoposide	Etoposide results in decreased expression of BIRC3 mRNA	16120219
BIRC3	evodiamine	evodiamine inhibits the reaction [TNF protein results in increased expression of BIRC3 protein]	15710601
BIRC3	Fenofibrate	Fenofibrate results in decreased expression of BIRC3 mRNA	20520642
BIRC3	Fluorides	[Arsenic co-treated with Fluorides] results in decreased expression of BIRC3 mRNA	19962721
BIRC3	Fluorouracil	Fluorouracil results in increased expression of BIRC3 mRNA	16557594
BIRC3	Folic Acid	Folic Acid affects the expression of BIRC3 mRNA	16361273
BIRC3	gastrin 17	[gastrin 17 co-treated with CCKBR protein] results in decreased expression of BIRC3	17704804
BIRC3	gemcitabine	gemcitabine affects the expression of BIRC3 mRNA	17039268
BIRC3	Gliotoxin	Gliotoxin inhibits the reaction [Tetradecanoylphorbol Acetate results in increased expression of BIRC3 mRNA]	14527959
BIRC3	Glutathione	Glutathione inhibits the reaction [Thimerosal results in decreased expression of BIRC3 protein]	12140745
BIRC3	hydroquinone	hydroquinone results in increased expression of BIRC3 mRNA	15452088
BIRC3	hydroxyhydroquinone	4-aminobenzhydrazide inhibits the reaction [hydroxyhydroquinone results in increased expression of BIRC3 mRNA]	24530881
BIRC3	hydroxyhydroquinone	hydroxyhydroquinone results in increased expression of BIRC3 mRNA	24530881
BIRC3	indole-3-carbinol	indole-3-carbinol inhibits the reaction [TNF protein results in increased expression of BIRC3 protein]	15811958
BIRC3	Indomethacin	Indomethacin inhibits the reaction [LTA protein results in increased expression of BIRC3 protein]	17873517
BIRC3	Indomethacin	Indomethacin results in decreased expression of BIRC3 mRNA	16984733
BIRC3	isoliquiritigenin	isoliquiritigenin results in decreased expression of BIRC3 protein	15729620
BIRC3	kamebakaurin	kamebakaurin inhibits the reaction [TNF protein results in increased expression of BIRC3 protein]	11877450
BIRC3	KN 62	[Etoposide co-treated with KN 62] results in decreased expression of BIRC3 protein	14666661
BIRC3	leptomycin B	leptomycin B affects the localization of BIRC3 protein	15265700
BIRC3	linalool	linalool results in increased expression of BIRC3 mRNA	19922762
BIRC3	Lipopolysaccharides	Lipopolysaccharides results in increased expression of BIRC3 mRNA	15454145
BIRC3	Lipopolysaccharides	Lipopolysaccharides results in increased expression of BIRC3 protein	15454145
BIRC3	lonafarnib	lonafarnib inhibits the reaction [TNF protein results in increased expression of BIRC3 protein]	15090542
BIRC3	Melitten	Melitten results in decreased expression of BIRC3 protein	21456063
BIRC3	Mercury	Mercury results in increased expression of BIRC3 mRNA	16823088
BIRC3	Methylene Chloride	Methylene Chloride results in increased expression of BIRC3 mRNA	20359517
BIRC3	Methyl Methanesulfonate	Methyl Methanesulfonate results in decreased expression of BIRC3 mRNA	23649840
BIRC3	methylselenic acid	methylselenic acid affects the expression of BIRC3 mRNA	14617803
BIRC3	monomethylarsonous acid	monomethylarsonous acid results in increased expression of BIRC3 mRNA	20886546
BIRC3	N(6)-(3-iodobenzyl)-5'-N-methylcarboxamidoadenosine	BIRC3 protein results in decreased susceptibility to N(6)-(3-iodobenzyl)-5'-N-methylcarboxamidoadenosine	16088125
BIRC3	N(6)-(3-iodobenzyl)-5'-N-methylcarboxamidoadenosine	N(6)-(3-iodobenzyl)-5'-N-methylcarboxamidoadenosine results in decreased expression of BIRC3 mRNA	16088125
BIRC3	nickel chloride	nickel chloride results in increased expression of BIRC3 mRNA	17312168
BIRC3	nickel sulfate	nickel sulfate results in increased expression of BIRC3 mRNA	16780908
BIRC3	Nitric Oxide	Nitric Oxide results in decreased expression of BIRC3 mRNA	15126337
BIRC3	Oxygen	AG 1879 inhibits the reaction [Oxygen deficiency results in increased expression of BIRC3 mRNA]	17671207
BIRC3	Oxygen	Oxygen deficiency results in increased expression of BIRC3 mRNA	17671207
BIRC3	Oxygen	[Rotenone co-treated with Thenoyltrifluoroacetone] inhibits the reaction [Oxygen deficiency results in increased expression of BIRC3 mRNA]	17671207
BIRC3	Paclitaxel	Curcumin inhibits the reaction [Paclitaxel results in increased expression of BIRC3 protein]	16243823
BIRC3	Paclitaxel	Paclitaxel results in decreased expression of BIRC3 protein	14749477|17701358|18098270
BIRC3	Paclitaxel	[Tretinoin co-treated with Paclitaxel] results in decreased expression of BIRC3 protein	17701358|18098270
BIRC3	Paraquat	Paraquat results in decreased expression of BIRC3 mRNA	18836921
BIRC3	pentabromodiphenyl ether	pentabromodiphenyl ether analog results in increased expression of BIRC3 mRNA	19095052
BIRC3	Pentoxifylline	[Pentoxifylline co-treated with TNFSF10 protein] results in decreased expression of BIRC3 protein	20804743
BIRC3	Dinoprostone	Dinoprostone results in increased expression of BIRC3 protein	12837940
BIRC3	Plant Extracts	Plant Extracts affects the expression of BIRC3 mRNA	12878215
BIRC3	Plant Extracts	Plant Extracts inhibits the reaction [TNF protein results in increased expression of BIRC3 protein]	18841906
BIRC3	Plant Extracts	Plant Extracts results in increased expression of BIRC3 mRNA	21920417
BIRC3	polyphenon E	polyphenon E results in decreased expression of BIRC3 protein	23285096
BIRC3	Potassium	BIRC3 protein affects the susceptibility to Potassium	9886081
BIRC3	potassium chromate(VI)	[potassium chromate(VI) co-treated with epigallocatechin gallate] results in decreased expression of BIRC3 mRNA	22079256
BIRC3	potassium chromate(VI)	potassium chromate(VI) results in decreased expression of BIRC3 mRNA	22079256
BIRC3	Progesterone	[Estradiol co-treated with Progesterone] results in increased expression of BIRC3 mRNA	20660070
BIRC3	pyrrolidine dithiocarbamic acid	pyrrolidine dithiocarbamic acid inhibits the reaction [Tetradecanoylphorbol Acetate results in increased expression of BIRC3 mRNA]	14527959
BIRC3	Quercetin	[Quercetin co-treated with Ascorbic Acid] results in increased expression of BIRC3 mRNA	17639512
BIRC3	Raloxifene	[Raloxifene co-treated with ESR2 protein] results in increased expression of BIRC3 mRNA	19059307
BIRC3	Reactive Oxygen Species	[Sulindac results in increased abundance of Reactive Oxygen Species] which results in decreased expression of BIRC3 protein	17136320
BIRC3	resveratrol	BCL2 protein inhibits the reaction [resveratrol results in decreased expression of BIRC3 protein]	11577002
BIRC3	resveratrol	resveratrol promotes the reaction [SIRT1 protein binds to BIRC3 promoter]	15152190
BIRC3	resveratrol	resveratrol results in decreased expression of BIRC3 protein	11577002
BIRC3	Rotenone	[Rotenone co-treated with Thenoyltrifluoroacetone] inhibits the reaction [Oxygen deficiency results in increased expression of BIRC3 mRNA]	17671207
BIRC3	rottlerin	rottlerin inhibits the reaction [Tetradecanoylphorbol Acetate results in increased expression of BIRC3 mRNA]	14527959
BIRC3	Silicon Dioxide	Silicon Dioxide analog results in increased expression of BIRC3 mRNA	23806026
BIRC3	Silicon Dioxide	Silicon Dioxide analog results in increased expression of BIRC3 protein	23806026
BIRC3	Simvastatin	Simvastatin inhibits the reaction [Homocysteine results in decreased expression of BIRC3 mRNA]	19343037
BIRC3	Simvastatin	Simvastatin inhibits the reaction [Homocysteine results in decreased expression of BIRC3 protein]	19343037
BIRC3	Simvastatin	Simvastatin inhibits the reaction [TNF protein results in increased expression of BIRC3 protein]	17277159
BIRC3	SM 164	SM 164 results in increased degradation of BIRC3 protein	22241084
BIRC3	SN50 peptide	SN50 peptide inhibits the reaction [4-(N-methyl-N-nitrosamino)-1-(3-pyridyl)-1-butanone results in increased expression of BIRC3 protein]	18508827
BIRC3	SN50 peptide	SN50 peptide results in decreased expression of BIRC3 protein	12466137|12970779
BIRC3	sodium arsenite	sodium arsenite results in decreased expression of BIRC3 protein	12676792
BIRC3	Sodium Selenite	Sodium Selenite results in decreased expression of BIRC3 mRNA	16705456
BIRC3	sorafenib	sorafenib results in decreased expression of BIRC3 protein	20473320
BIRC3	Staurosporine	BIRC3 protein results in decreased susceptibility to Staurosporine	16144937
BIRC3	Sulindac	[Sulindac results in increased abundance of Reactive Oxygen Species] which results in decreased expression of BIRC3 protein	17136320
BIRC3	sulindac sulfide	sulindac sulfide results in increased expression of BIRC3 mRNA	16184548
BIRC3	Tamoxifen	[Tamoxifen co-treated with ESR2 protein] results in increased expression of BIRC3 mRNA	19059307
BIRC3	tanshinone	tanshinone results in decreased expression of BIRC3 mRNA	15849732
BIRC3	tephrosin	tephrosin inhibits the reaction [TNF protein results in increased expression of BIRC3 protein]	18841906
BIRC3	Testosterone	[Testosterone co-treated with Calcitriol] results in increased expression of BIRC3 mRNA	21592394
BIRC3	Testosterone	Testosterone results in increased expression of BIRC3 mRNA	21592394
BIRC3	Tetrachlorodibenzodioxin	Tetrachlorodibenzodioxin results in increased expression of BIRC3 mRNA	20106945|21632981
BIRC3	Tetradecanoylphorbol Acetate	benzyloxycarbonylleucyl-leucyl-leucine aldehyde inhibits the reaction [Tetradecanoylphorbol Acetate results in increased expression of BIRC3 mRNA]	14527959
BIRC3	Tetradecanoylphorbol Acetate	Gliotoxin inhibits the reaction [Tetradecanoylphorbol Acetate results in increased expression of BIRC3 mRNA]	14527959
BIRC3	Tetradecanoylphorbol Acetate	pyrrolidine dithiocarbamic acid inhibits the reaction [Tetradecanoylphorbol Acetate results in increased expression of BIRC3 mRNA]	14527959
BIRC3	Tetradecanoylphorbol Acetate	rottlerin inhibits the reaction [Tetradecanoylphorbol Acetate results in increased expression of BIRC3 mRNA]	14527959
BIRC3	Tetradecanoylphorbol Acetate	Tetradecanoylphorbol Acetate results in increased expression of BIRC3 mRNA	14527959
BIRC3	Thapsigargin	2-(4-morpholinyl)-8-phenyl-4H-1-benzopyran-4-one inhibits the reaction [Thapsigargin results in increased expression of BIRC3 mRNA]	15339911
BIRC3	Thapsigargin	2-(4-morpholinyl)-8-phenyl-4H-1-benzopyran-4-one inhibits the reaction [Thapsigargin results in increased expression of BIRC3 protein]	15339911
BIRC3	Thapsigargin	Thapsigargin results in increased expression of BIRC3 mRNA	15339911
BIRC3	Thapsigargin	Thapsigargin results in increased expression of BIRC3 protein	15339911
BIRC3	Thenoyltrifluoroacetone	[Rotenone co-treated with Thenoyltrifluoroacetone] inhibits the reaction [Oxygen deficiency results in increased expression of BIRC3 mRNA]	17671207
BIRC3	Thimerosal	Glutathione inhibits the reaction [Thimerosal results in decreased expression of BIRC3 protein]	12140745
BIRC3	Thimerosal	Thimerosal results in decreased expression of BIRC3 protein	12140745
BIRC3	Toluene	Toluene results in increased expression of BIRC3 mRNA	20359517
BIRC3	Tosylphenylalanyl Chloromethyl Ketone	Acetylcysteine inhibits the reaction [Tosylphenylalanyl Chloromethyl Ketone results in decreased expression of BIRC3 protein]	19679660
BIRC3	Tosylphenylalanyl Chloromethyl Ketone	Tosylphenylalanyl Chloromethyl Ketone results in decreased expression of BIRC3 protein	19679660
BIRC3	Tretinoin	[Tretinoin co-treated with Paclitaxel] results in decreased expression of BIRC3 protein	17701358|18098270
BIRC3	Tretinoin	Tretinoin results in decreased expression of BIRC3 mRNA	23724009
BIRC3	Tretinoin	Tretinoin results in decreased expression of BIRC3 protein	17701358|18098270
BIRC3	Trichloroethylene	Trichloroethylene results in increased expression of BIRC3 mRNA	20359517
BIRC3	triptolide	triptolide results in decreased expression of BIRC3 mRNA	15972136
BIRC3	U 0126	U 0126 inhibits the reaction [4-(N-methyl-N-nitrosamino)-1-(3-pyridyl)-1-butanone results in increased expression of BIRC3 protein]	18508827
BIRC3	Uranium Compounds	Uranium Compounds results in increased expression of BIRC3 mRNA	19654044
BIRC3	Vinblastine	BIRC3 protein affects the susceptibility to Vinblastine	16217747
BIRC3	Vincristine	Vincristine results in increased expression of BIRC3 mRNA	23649840
BIRC3	Vitamin E	Vitamin E inhibits the reaction [cinnamic aldehyde results in decreased expression of BIRC3 protein]	15566391
BIRC3	vorinostat	[vorinostat co-treated with TNFSF10 protein] results in decreased expression of BIRC3 protein	19643600
BIRC3	vorinostat	vorinostat inhibits the reaction [TNF protein results in increased expression of BIRC3 protein]	16377638
BIRC3	vorinostat	vorinostat results in decreased expression of BIRC3 protein	15897598
BIRC3	wortmannin	wortmannin inhibits the reaction [Acrolein results in increased expression of BIRC3 protein]	19596284
BIRC3	zerumbone	zerumbone results in decreased expression of BIRC3 mRNA	16007145
BIRC3	Zinc	Zinc results in decreased expression of BIRC3 protein	12429649
BIRC3	zinc protoporphyrin	zinc protoporphyrin analog inhibits the reaction [4-(N-methyl-N-nitrosamino)-1-(3-pyridyl)-1-butanone results in increased expression of BIRC3 protein]	18508827
BIRC3	Zymosan	Zymosan analog results in decreased expression of BIRC3 mRNA	16803582
C4B	2-aminothiophenol	2-aminothiophenol inhibits the reaction [C4B protein binds to C1S protein]	8435078
C4B	Benzo(a)pyrene	Benzo(a)pyrene results in increased expression of C4B mRNA	22316170
C4B	Penicillamine	Penicillamine inhibits the reaction [C4B protein binds to C1S protein]	8435078
C4B	Tobacco Smoke Pollution	Tobacco Smoke Pollution results in decreased expression of C4B protein	19478969
CAMK2G	3-(4'-hydroxy-3'-adamantylbiphenyl-4-yl)acrylic acid	3-(4'-hydroxy-3'-adamantylbiphenyl-4-yl)acrylic acid results in decreased expression of CAMK2G mRNA	12958071
CAMK2G	arsenic trioxide	arsenic trioxide results in increased expression of CAMK2G mRNA	20458559
CAMK2G	Estradiol	Estradiol affects the expression of CAMK2G mRNA	14699072
CAMK2G	beta-methylcholine	beta-methylcholine affects the expression of CAMK2G mRNA	21179406
CAMK2G	Cadmium Chloride	Cadmium Chloride results in decreased expression of CAMK2G mRNA	18560533
CAMK2G	cobaltous chloride	cobaltous chloride results in increased expression of CAMK2G mRNA	19376846
CAMK2G	KN 62	KN 62 results in decreased phosphorylation of and results in decreased activity of CAMK2G protein	17431504
CAMK2G	methylselenic acid	methylselenic acid results in increased expression of CAMK2G mRNA	18548127
CAMK2G	sodium arsenate	sodium arsenate results in decreased expression of CAMK2G mRNA	12727804
CAMK2G	sodium arsenite	sodium arsenite results in decreased expression of CAMK2G mRNA	12727804
CAMK2G	Tretinoin	Tretinoin inhibits the reaction [CAMK2G protein binds to CEBPE promoter]	17431504
CAMK2G	Valproic Acid	Valproic Acid results in increased expression of CAMK2G mRNA	19101580|23179753
CAMK2G	Vitamin E	Vitamin E results in decreased expression of CAMK2G mRNA	19244175
CASP9	10-decarbamoylmitomycin C	10-decarbamoylmitomycin C results in increased activity of CASP9 protein	17530733
CASP9	10-methoxy-2,2-dimethyl-2,6-dihydropyrano(3,2-c)quinolin-5-one	10-methoxy-2,2-dimethyl-2,6-dihydropyrano(3,2-c)quinolin-5-one inhibits the reaction [XIAP protein binds to CASP9 protein]	20833157
CASP9	10-methoxy-2,2-dimethyl-2,6-dihydropyrano(3,2-c)quinolin-5-one	10-methoxy-2,2-dimethyl-2,6-dihydropyrano(3,2-c)quinolin-5-one results in increased activity of and results in increased cleavage of CASP9 protein	20833157
CASP9	10-methoxy-2,2-dimethyl-2,6-dihydropyrano(3,2-c)quinolin-5-one	[benzyloxycarbonyl-leucyl-glutamyl-histidyl-aspartic acid fluoromethyl ketone results in decreased activity of CASP9 protein] which results in decreased susceptibility to 10-methoxy-2,2-dimethyl-2,6-dihydropyrano(3,2-c)quinolin-5-one	20833157
CASP9	10-methoxy-2,2-dimethyl-2,6-dihydropyrano(3,2-c)quinolin-5-one	CASP8 protein affects the susceptibility to [10-methoxy-2,2-dimethyl-2,6-dihydropyrano(3,2-c)quinolin-5-one results in increased activity of CASP9 protein]	20833157
CASP9	10'(Z),13'(E),15'(E)-heptadecatrienylhydroquinone	10'(Z),13'(E),15'(E)-heptadecatrienylhydroquinone results in increased activity of CASP9 protein	23088786
CASP9	11-keto-boswellic acid	11-keto-boswellic acid analog results in increased activity of CASP9 protein	21056033
CASP9	1-(2-chlorobenzyl)-5'-phenyl-3'H-spiro(indoline-3,2'-(1,3,4)thiadiazol)-2-one	1-(2-chlorobenzyl)-5'-phenyl-3'H-spiro(indoline-3,2'-(1,3,4)thiadiazol)-2-one results in increased activity of CASP9 protein	21903591|23826121
CASP9	1-(2-chlorobenzyl)-5'-phenyl-3'H-spiro(indoline-3,2'-(1,3,4)thiadiazol)-2-one	1-(2-chlorobenzyl)-5'-phenyl-3'H-spiro(indoline-3,2'-(1,3,4)thiadiazol)-2-one results in increased cleavage of CASP9 protein	21903591
CASP9	1-(2-chlorobenzyl)-5'-phenyl-3'H-spiro(indoline-3,2'-(1,3,4)thiadiazol)-2-one	CCAR1 protein affects the reaction [1-(2-chlorobenzyl)-5'-phenyl-3'H-spiro(indoline-3,2'-(1,3,4)thiadiazol)-2-one results in increased activity of CASP9 protein]	21903591
CASP9	1-(2-cyano-3,12-dioxooleana-1,9-dien-28-oyl) imidazole	[bortezomib co-treated with 1-(2-cyano-3,12-dioxooleana-1,9-dien-28-oyl) imidazole] results in increased activity of CASP9 protein	15070698
CASP9	1,2-Dihydroxybenzene-3,5-Disulfonic Acid Disodium Salt	1,2-Dihydroxybenzene-3,5-Disulfonic Acid Disodium Salt affects the reaction [bortezomib results in increased cleavage of CASP9 protein]	15509775
CASP9	1,2-Dihydroxybenzene-3,5-Disulfonic Acid Disodium Salt	1,2-Dihydroxybenzene-3,5-Disulfonic Acid Disodium Salt inhibits the reaction [melamine results in increased cleavage of CASP9 protein]	22915474
CASP9	1-(3',4',5'-trimethoxyphenyl)-3-(3'',4''-dimethoxy-2'-hydroxyphenyl)propane	1-(3',4',5'-trimethoxyphenyl)-3-(3'',4''-dimethoxy-2'-hydroxyphenyl)propane results in increased activity of and results in increased cleavage of CASP9 protein	20674558
CASP9	1-(3',4',5'-trimethoxyphenyl)-3-(3'',4''-dimethoxy-2'-hydroxyphenyl)propane	[benzyloxycarbonyl-leucyl-glutamyl-histidyl-aspartic acid fluoromethyl ketone results in decreased activity of CASP9 protein] which results in decreased susceptibility to 1-(3',4',5'-trimethoxyphenyl)-3-(3'',4''-dimethoxy-2'-hydroxyphenyl)propane	20674558
CASP9	1,4-anthraquinone	1,4-anthraquinone analog results in increased activity of CASP9 protein	17912452
CASP9	15-deoxy-delta(12,14)-prostaglandin J2	15-deoxy-delta(12,14)-prostaglandin J2 results in increased cleavage of and results in increased activity of CASP9 protein	15498850
CASP9	16-hydroxycleroda-3,13(14)-dien-15,16-olide	16-hydroxycleroda-3,13(14)-dien-15,16-olide results in increased cleavage of and results in increased activity of CASP9 protein	21530604
CASP9	17-(dimethylaminoethylamino)-17-demethoxygeldanamycin	17-(dimethylaminoethylamino)-17-demethoxygeldanamycin promotes the reaction [arsenic trioxide results in increased cleavage of CASP9 protein]	19371599
CASP9	2-(1H-indazol-4-yl)-6-(4-methanesulfonylpiperazin-1-ylmethyl)-4-morpholin-4-ylthieno(3,2-d)pyrimidine	2-(1H-indazol-4-yl)-6-(4-methanesulfonylpiperazin-1-ylmethyl)-4-morpholin-4-ylthieno(3,2-d)pyrimidine results in increased cleavage of CASP9 protein	23318440
CASP9	2-(1-hydroxy-4-oxocyclohexa-2,5-dienyl)pyran-4-one	2-(1-hydroxy-4-oxocyclohexa-2,5-dienyl)pyran-4-one results in decreased expression of CASP9	24300195
CASP9	2,2',4,4',5-brominated diphenyl ether	2,2',4,4',5-brominated diphenyl ether results in increased activity of CASP9 protein	23124135
CASP9	2-(2-amino-3-methoxyphenyl)-4H-1-benzopyran-4-one	2-(2-amino-3-methoxyphenyl)-4H-1-benzopyran-4-one inhibits the reaction [Fenretinide results in increased cleavage of CASP9 protein]	16407847
CASP9	2-(2-amino-3-methoxyphenyl)-4H-1-benzopyran-4-one	2-(2-amino-3-methoxyphenyl)-4H-1-benzopyran-4-one inhibits the reaction [Pt(O,O'-acac)(gamma-acac)(DMS) results in increased activity of CASP9 protein]	21420390
CASP9	2-(2-amino-3-methoxyphenyl)-4H-1-benzopyran-4-one	2-(2-amino-3-methoxyphenyl)-4H-1-benzopyran-4-one promotes the reaction [methyl 5-chloro-4,5-didehydrojasmonate results in increased activity of CASP9 protein]	20696234
CASP9	2-(2-amino-3-methoxyphenyl)-4H-1-benzopyran-4-one	[2-(2-amino-3-methoxyphenyl)-4H-1-benzopyran-4-one results in decreased activity of MAP2K1 protein] inhibits the reaction [Doxorubicin results in increased cleavage of CASP9 protein]	18594523
CASP9	2-(2-amino-3-methoxyphenyl)-4H-1-benzopyran-4-one	[2-(2-amino-3-methoxyphenyl)-4H-1-benzopyran-4-one results in decreased activity of MAP2K1 protein] inhibits the reaction [SOD2 protein affects the reaction [Doxorubicin results in increased cleavage of CASP9 protein]]	18594523
CASP9	2-(2-aminoethyl)pyridine	[Copper binds to Isatin binds to 2-(2-aminoethyl)pyridine] which results in increased cleavage of CASP9 protein	17327230
CASP9	2-(2-chloro-4-iodophenylamino)-N-cyclopropylmethoxy-3,4-difluorobenzamide	[sorafenib co-treated with 2-(2-chloro-4-iodophenylamino)-N-cyclopropylmethoxy-3,4-difluorobenzamide] results in increased cleavage of CASP9 protein	20117835
CASP9	2,4,3',5'-tetramethoxystilbene	2,4,3',5'-tetramethoxystilbene results in increased activity of CASP9 protein	20490654
CASP9	2,4,5,2',4',5'-hexachlorobiphenyl	2,4,5,2',4',5'-hexachlorobiphenyl results in increased expression of CASP9 protein	20638727
CASP9	2'-(4-chlorophenyl)-3-(4-chlorophenylidene)-5,10-dimethyl-12-methylene-decahydro-1,2-(1',3'-dioxocyclopenta(c))azuleno(4,5-b)furan-4,11-dione	2'-(4-chlorophenyl)-3-(4-chlorophenylidene)-5,10-dimethyl-12-methylene-decahydro-1,2-(1',3'-dioxocyclopenta(c))azuleno(4,5-b)furan-4,11-dione results in increased cleavage of and results in increased activity of CASP9 protein	21741372
CASP9	2-(4-morpholinyl)-8-phenyl-4H-1-benzopyran-4-one	2-(4-morpholinyl)-8-phenyl-4H-1-benzopyran-4-one affects the reaction [Indomethacin results in increased activity of CASP9 protein]	17341418
CASP9	2-(4-morpholinyl)-8-phenyl-4H-1-benzopyran-4-one	[2-(4-morpholinyl)-8-phenyl-4H-1-benzopyran-4-one co-treated with fludarabine] results in increased cleavage of CASP9 protein	15850772
CASP9	2-(4-morpholinyl)-8-phenyl-4H-1-benzopyran-4-one	2-(4-morpholinyl)-8-phenyl-4H-1-benzopyran-4-one inhibits the reaction [Simvastatin results in decreased activity of CASP9 protein]	12438947
CASP9	2-(4-morpholinyl)-8-phenyl-4H-1-benzopyran-4-one	2-(4-morpholinyl)-8-phenyl-4H-1-benzopyran-4-one promotes the reaction [Doxorubicin results in increased cleavage of CASP9 protein]	20856197
CASP9	2-(4-morpholinyl)-8-phenyl-4H-1-benzopyran-4-one	BCL2 protein inhibits the reaction [2-(4-morpholinyl)-8-phenyl-4H-1-benzopyran-4-one promotes the reaction [Doxorubicin results in increased cleavage of CASP9 protein]]	20856197
CASP9	2-(4-morpholinyl)-8-phenyl-4H-1-benzopyran-4-one	TP53 protein promotes the reaction [2-(4-morpholinyl)-8-phenyl-4H-1-benzopyran-4-one promotes the reaction [Doxorubicin results in increased cleavage of CASP9 protein]]	20856197
CASP9	2-5,6,7,8,4'-pentamethoxyflavanone	2-5,6,7,8,4'-pentamethoxyflavanone results in increased cleavage of CASP9 protein	19450678
CASP9	2,5,7,8-tetramethyl-2R-(4R,8R,12-trimethyltridecyl)chroman-6-yloxy acetic acid	[Cisplatin co-treated with 2,5,7,8-tetramethyl-2R-(4R,8R,12-trimethyltridecyl)chroman-6-yloxy acetic acid] results in increased cleavage of CASP9 protein	21214929
CASP9	2,5,7,8-tetramethyl-2R-(4R,8R,12-trimethyltridecyl)chroman-6-yloxy acetic acid	[Doxorubicin co-treated with 2,5,7,8-tetramethyl-2R-(4R,8R,12-trimethyltridecyl)chroman-6-yloxy acetic acid] results in increased cleavage of CASP9 protein	21214929
CASP9	28-deoxonimbolide	28-deoxonimbolide results in increased activity of CASP9 protein	21381696
CASP9	2-amino-8-(4-(2-hydroxyethoxy)cyclohexyl)-6-(6-methoxypyridin-3-yl)-4-methylpyrido(2,3-d)pyrimidin-7(8H)-one	2-amino-8-(4-(2-hydroxyethoxy)cyclohexyl)-6-(6-methoxypyridin-3-yl)-4-methylpyrido(2,3-d)pyrimidin-7(8H)-one results in increased cleavage of and results in increased activity of CASP9 protein	23639247
CASP9	2-chloroethyl ethyl sulfide	2-chloroethyl ethyl sulfide results in increased expression of CASP9 mRNA	12208782
CASP9	2'-epi-2'-O-acetylthevetin B	2'-epi-2'-O-acetylthevetin B results in increased activity of CASP9 protein	19874809
CASP9	2-methoxyestradiol-3,17-bis-O,O-sulfamate	2-methoxyestradiol-3,17-bis-O,O-sulfamate results in increased cleavage of and results in increased activity of CASP9 protein	15258464
CASP9	3,3',4,4',5,5'-hexahydroxystilbene	3,3',4,4',5,5'-hexahydroxystilbene results in increased activity of CASP9 protein	24398169
CASP9	3,3',4,5'-tetrahydroxystilbene	3,3',4,5'-tetrahydroxystilbene results in increased cleavage of CASP9 protein	21167276
CASP9	3,3',5,5'-tetrahydroxystilbene	3,3',5,5'-tetrahydroxystilbene results in increased activity of CASP9 protein	20484155
CASP9	3',4',7-trihydroxyisoflavone	3',4',7-trihydroxyisoflavone promotes the reaction [Epirubicin results in increased expression of CASP9 mRNA]	22914566
CASP9	3',4',7-trihydroxyisoflavone	3',4',7-trihydroxyisoflavone results in increased activity of CASP9 protein	22914566
CASP9	3',4',7-trihydroxyisoflavone	3',4',7-trihydroxyisoflavone results in increased expression of CASP9 mRNA	22914566
CASP9	3',4',7-trihydroxyisoflavone	Epirubicin promotes the reaction [3',4',7-trihydroxyisoflavone results in increased activity of CASP9 protein]	22914566
CASP9	3',4',7-trihydroxyisoflavone	Epirubicin promotes the reaction [3',4',7-trihydroxyisoflavone results in increased expression of CASP9 mRNA]	22914566
CASP9	3,4-dihydro-5-(4-(1-piperidinyl)butoxy)-1(2H)-isoquinolinone	3,4-dihydro-5-(4-(1-piperidinyl)butoxy)-1(2H)-isoquinolinone inhibits the reaction [[arsenic trioxide co-treated with phytosphingosine] results in increased activity of CASP9 protein]	17237268
CASP9	3-methyladenine	3-methyladenine promotes the reaction [ABT-737 promotes the reaction [celecoxib results in increased cleavage of CASP9 protein]]	20104024
CASP9	3-methyladenine	3-methyladenine promotes the reaction [ABT-737 results in increased cleavage of CASP9 protein]	20104024
CASP9	3-methyladenine	3-methyladenine promotes the reaction [celecoxib promotes the reaction [ABT-737 results in increased cleavage of CASP9 protein]]	20104024
CASP9	3-methyladenine	3-methyladenine promotes the reaction [celecoxib results in increased cleavage of CASP9 protein]	20104024
CASP9	3-methyladenine	benzyloxycarbonyl-isoleucyl-glutamyl-threonyl-aspartic acid fluoromethyl ketone inhibits the reaction [3-methyladenine promotes the reaction [ABT-737 promotes the reaction [celecoxib results in increased cleavage of CASP9 protein]]]	20104024
CASP9	3-methyladenine	benzyloxycarbonyl-isoleucyl-glutamyl-threonyl-aspartic acid fluoromethyl ketone inhibits the reaction [3-methyladenine promotes the reaction [celecoxib promotes the reaction [ABT-737 results in increased cleavage of CASP9 protein]]]	20104024
CASP9	4-(1H-imidazol-1-yl)retinoic acid	4-(1H-imidazol-1-yl)retinoic acid results in increased cleavage of and results in increased activity of CASP9 protein	17387344
CASP9	4-(5-(4-chlorophenyl)-3-(trifluoromethyl)-1H-pyrazol-1-yl)benzenesulfonamide	4-(5-(4-chlorophenyl)-3-(trifluoromethyl)-1H-pyrazol-1-yl)benzenesulfonamide results in increased cleavage of and results in increased activity of CASP9 protein	12203115
CASP9	4-(5-(4-chlorophenyl)-3-(trifluoromethyl)-1H-pyrazol-1-yl)benzenesulfonamide	TNFSF10 protein promotes the reaction [4-(5-(4-chlorophenyl)-3-(trifluoromethyl)-1H-pyrazol-1-yl)benzenesulfonamide results in increased cleavage of and results in increased activity of CASP9 protein]	12203115
CASP9	4,5,6,7-tetrabromobenzotriazole	[4,5,6,7-tetrabromobenzotriazole co-treated with TNFSF10 protein] results in increased cleavage of and results in increased activity of CASP9 protein	16489027
CASP9	4-(6-bromo-1,3-benzodioxol-5-yl)-3a,4,5,9b-3H-cyclopenta(c)quinoline	4-(6-bromo-1,3-benzodioxol-5-yl)-3a,4,5,9b-3H-cyclopenta(c)quinoline results in increased cleavage of CASP9 protein	24161432
CASP9	4-(6-cyclohexylmethoxy-9H-purin-2-ylamino)-N,N-diethylbenzamide	[4-(6-cyclohexylmethoxy-9H-purin-2-ylamino)-N,N-diethylbenzamide co-treated with Paclitaxel] results in increased activity of CASP9 protein	16170024
CASP9	4'-methoxy licoflavanone	4'-methoxy licoflavanone results in increased cleavage of CASP9 protein	23850732
CASP9	4'-methoxy licoflavanone	[4'-methoxy licoflavanone results in increased expression of FAS protein] which results in increased cleavage of CASP9 protein	23850732
CASP9	4-methylene-2-octyl-5-oxofuran-3-carboxylic acid	[4-methylene-2-octyl-5-oxofuran-3-carboxylic acid co-treated with Cisplatin] results in increased activity of CASP9 protein	21442130
CASP9	4-methylene-2-octyl-5-oxofuran-3-carboxylic acid	4-methylene-2-octyl-5-oxofuran-3-carboxylic acid results in increased activity of CASP9 protein	21442130
CASP9	4-oxofenretinide	4-oxofenretinide results in increased activity of CASP9 protein	16540676
CASP9	5-((4-methylphenyl)methylene)-2-(phenylamino)-4(5H)-thiazolone	5-((4-methylphenyl)methylene)-2-(phenylamino)-4(5H)-thiazolone results in increased cleavage of CASP9 protein	15831436
CASP9	5-((4-methylphenyl)methylene)-2-(phenylamino)-4(5H)-thiazolone	anthra(1,9-cd)pyrazol-6(2H)-one inhibits the reaction [5-((4-methylphenyl)methylene)-2-(phenylamino)-4(5H)-thiazolone results in increased cleavage of CASP9 protein]	15831436
CASP9	5,6-dichlorobenzimidazole	5,6-dichlorobenzimidazole promotes the reaction [TNFSF10 protein results in increased cleavage of CASP9 protein]	15688023
CASP9	5,7-dihydroxy-6-methoxy-2-phenylchromen-4-one	5,7-dihydroxy-6-methoxy-2-phenylchromen-4-one results in decreased expression of CASP9 protein	19135124
CASP9	6-((3-chloro)anilino)-2-(isopropyl-2-hydroxyethylamino)-9-isopropylpurine	[6-((3-chloro)anilino)-2-(isopropyl-2-hydroxyethylamino)-9-isopropylpurine co-treated with Paclitaxel] results in increased activity of CASP9 protein	16170024
CASP9	6-codeinone	6-codeinone results in increased activity of CASP9 protein	12894543
CASP9	6-hydroxy-2,5,7,8-tetramethylchroman-2-carboxylic acid	6-hydroxy-2,5,7,8-tetramethylchroman-2-carboxylic acid inhibits the reaction [Indomethacin results in increased activity of CASP9 protein]	17341418
CASP9	6-hydroxy-2,5,7,8-tetramethylchroman-2-carboxylic acid	6-hydroxy-2,5,7,8-tetramethylchroman-2-carboxylic acid inhibits the reaction [TNFSF10 protein results in increased activity of CASP9 protein]	23711929
CASP9	6-(N,N-dimethylamino)-2-(naphthalene-1-yl)-4-quinazolinone	6-(N,N-dimethylamino)-2-(naphthalene-1-yl)-4-quinazolinone results in increased expression of CASP9 protein	23212307
CASP9	6-(N,N-dimethylamino)-2-(naphthalene-1-yl)-4-quinazolinone	anthra(1,9-cd)pyrazol-6(2H)-one inhibits the reaction [6-(N,N-dimethylamino)-2-(naphthalene-1-yl)-4-quinazolinone results in increased expression of CASP9 protein]	23212307
CASP9	6-O-angeloylenolin	6-O-angeloylenolin results in increased cleavage of CASP9 protein	21192922
CASP9	7,8-diacetoxy-4-methylcoumarin	7,8-diacetoxy-4-methylcoumarin results in increased activity of CASP9 protein	19061872
CASP9	7,8-diacetoxy-4-methylthiocoumarin	7,8-diacetoxy-4-methylthiocoumarin results in increased activity of CASP9 protein	19061872
CASP9	7-(benzylamino)-1,3,4,8-tetrahydropyrrolo(4,3,2-de)quinolin-8(1H)-one	7-(benzylamino)-1,3,4,8-tetrahydropyrrolo(4,3,2-de)quinolin-8(1H)-one results in increased expression of CASP9 protein modified form	19936915
CASP9	7-hydroxystaurosporine	[7-hydroxystaurosporine co-treated with Sirolimus] results in increased cleavage of CASP9 protein	15767555
CASP9	7-monohydroxyethylrutoside	7-monohydroxyethylrutoside inhibits the reaction [Doxorubicin results in increased cleavage of and results in increased activity of CASP9 protein]	17285121
CASP9	9-methoxycamptothecin	9-methoxycamptothecin results in increased activity of CASP9 protein	23369935
CASP9	abexinostat	abexinostat results in increased cleavage of CASP9 protein	19417023
CASP9	abexinostat	bortezomib promotes the reaction [abexinostat results in increased cleavage of CASP9 protein]	19417023
CASP9	ABT-737	3-methyladenine promotes the reaction [ABT-737 promotes the reaction [celecoxib results in increased cleavage of CASP9 protein]]	20104024
CASP9	ABT-737	3-methyladenine promotes the reaction [ABT-737 results in increased cleavage of CASP9 protein]	20104024
CASP9	ABT-737	3-methyladenine promotes the reaction [celecoxib promotes the reaction [ABT-737 results in increased cleavage of CASP9 protein]]	20104024
CASP9	ABT-737	[ABT-737 co-treated with celecoxib] results in increased activity of CASP9 protein	20104024
CASP9	ABT-737	ABT-737 promotes the reaction [celecoxib results in increased cleavage of CASP9 protein]	20104024
CASP9	ABT-737	ABT-737 promotes the reaction [wortmannin promotes the reaction [celecoxib results in increased cleavage of CASP9 protein]]	20104024
CASP9	ABT-737	ABT-737 results in increased cleavage of CASP9 protein	20104024
CASP9	ABT-737	benzyloxycarbonyl-isoleucyl-glutamyl-threonyl-aspartic acid fluoromethyl ketone inhibits the reaction [3-methyladenine promotes the reaction [ABT-737 promotes the reaction [celecoxib results in increased cleavage of CASP9 protein]]]	20104024
CASP9	ABT-737	benzyloxycarbonyl-isoleucyl-glutamyl-threonyl-aspartic acid fluoromethyl ketone inhibits the reaction [3-methyladenine promotes the reaction [celecoxib promotes the reaction [ABT-737 results in increased cleavage of CASP9 protein]]]	20104024
CASP9	ABT-737	benzyloxycarbonyl-isoleucyl-glutamyl-threonyl-aspartic acid fluoromethyl ketone inhibits the reaction [ABT-737 promotes the reaction [celecoxib results in increased cleavage of CASP9 protein]]	20104024
CASP9	ABT-737	benzyloxycarbonyl-isoleucyl-glutamyl-threonyl-aspartic acid fluoromethyl ketone inhibits the reaction [celecoxib promotes the reaction [ABT-737 results in increased cleavage of CASP9 protein]]	20104024
CASP9	ABT-737	celecoxib promotes the reaction [ABT-737 results in increased cleavage of CASP9 protein]	20104024
CASP9	ABT-737	MAP1LC3B mutant form promotes the reaction [[celecoxib co-treated with ABT-737] results in increased cleavage of CASP9 protein]	20104024
CASP9	ABT-737	PIK3C3 mutant form promotes the reaction [[celecoxib co-treated with ABT-737] results in increased cleavage of CASP9 protein]	20104024
CASP9	Acetaminophen	Acetaminophen results in increased activity of CASP9	12005112
CASP9	Acetylcysteine	Acetylcysteine affects the reaction [SOD2 protein affects the activity of CASP9 protein]	18594523
CASP9	Acetylcysteine	Acetylcysteine inhibits the reaction [arsenic trioxide promotes the reaction [Poly I-C results in increased activity of CASP9 protein]]	21418039
CASP9	Acetylcysteine	Acetylcysteine inhibits the reaction [arsenic trioxide results in increased activity of CASP9 protein]	19771260
CASP9	Acetylcysteine	Acetylcysteine inhibits the reaction [cadmium acetate results in increased activity of CASP9 protein]	16169029
CASP9	Acetylcysteine	Acetylcysteine inhibits the reaction [[Cisplatin co-treated with FASLG protein] results in increased activity of CASP9 protein]	17574045
CASP9	Acetylcysteine	Acetylcysteine inhibits the reaction [Cisplatin results in increased activity of CASP9 protein]	21166495
CASP9	Acetylcysteine	Acetylcysteine inhibits the reaction [Cisplatin results in increased cleavage of CASP9 protein]	15496615
CASP9	Acetylcysteine	Acetylcysteine inhibits the reaction [cordycepin results in increased activity of CASP9 protein]	21310227
CASP9	Acetylcysteine	Acetylcysteine inhibits the reaction [formononetin results in increased expression of CASP9 mRNA]	23867903
CASP9	Acetylcysteine	Acetylcysteine inhibits the reaction [Lipopolysaccharides results in increased activity of CASP9 protein]	20848084
CASP9	Acetylcysteine	Acetylcysteine inhibits the reaction [Poly I-C promotes the reaction [arsenic trioxide results in increased activity of CASP9 protein]]	21418039
CASP9	Acetylcysteine	Acetylcysteine inhibits the reaction [[sodium arsenite co-treated with Vitamin K 3] results in increased activity of CASP9 protein]	19082730
CASP9	Acetylcysteine	Acetylcysteine inhibits the reaction [TNFSF10 protein results in increased activity of CASP9 protein]	23711929
CASP9	Acetylcysteine	[Glucose deficiency co-treated with Acetylcysteine] results in increased activity of CASP9 protein	17309078
CASP9	acetyl-leucyl-glutamyl-histidyl-aspartal	acetyl-leucyl-glutamyl-histidyl-aspartal inhibits the reaction [Cisplatin results in increased activity of CASP9 protein]	23747833
CASP9	acetyl-leucyl-glutamyl-histidyl-aspartal	acetyl-leucyl-glutamyl-histidyl-aspartal inhibits the reaction [[GJB1 protein co-treated with GJB2 protein] promotes the reaction [Cisplatin results in increased activity of CASP9 protein]]	23747833
CASP9	acetyl-leucyl-glutamyl-histidyl-aspartal	acetyl-leucyl-glutamyl-histidyl-aspartal results in decreased activity of CASP9 protein	16027529
CASP9	Acitretin	Acitretin results in increased activity of CASP9 protein	18624760
CASP9	Acrolein	Acrolein results in increased activity of CASP9 protein	19596284
CASP9	Adenosine	Adenosine results in increased activity of CASP9 protein	11570579
CASP9	Adenosine	Thymidine inhibits the reaction [Adenosine results in increased activity of CASP9 protein]	11570579
CASP9	Aflatoxin B1	Aflatoxin B1 results in increased cleavage of CASP9 protein	22743290
CASP9	alantolactone	alantolactone results in increased activity of CASP9 protein	24252419
CASP9	alantolactone	alantolactone results in increased cleavage of CASP9 protein	22721982
CASP9	Alendronate	TNFSF11 inhibits the reaction [Alendronate results in increased expression of CASP9 protein]	19405951
CASP9	allyl disulfide	allyl disulfide results in increased activity of CASP9 protein	17647244
CASP9	allyl sulfide	allyl sulfide results in increased activity of CASP9 protein	17647244
CASP9	aloe emodin	aloe emodin results in increased activity of CASP9 protein	19928967
CASP9	aloe emodin	aloe emodin results in increased expression of CASP9 protein modified form	19928967
CASP9	aloe emodin	[Fluorouracil co-treated with aloe emodin] affects the expression of CASP9	19928967
CASP9	aloe emodin	Fluorouracil promotes the reaction [aloe emodin results in increased expression of CASP9 protein modified form]	19928967
CASP9	alpha-Tocopherol	alpha-Tocopherol analog results in increased cleavage of CASP9 protein	20686688
CASP9	alpha-Tocopherol	alpha-Tocopherol results in increased cleavage of and results in increased activity of CASP9 protein	21869839
CASP9	alpinumisoflavone	alpinumisoflavone results in increased cleavage of CASP9 protein	23850732
CASP9	alpinumisoflavone	[alpinumisoflavone results in increased expression of FAS protein] which results in increased cleavage of CASP9 protein	23850732
CASP9	alternariol	alternariol results in increased activity of CASP9 protein	22542754
CASP9	alternariol monomethyl ether	alternariol monomethyl ether results in increased activity of CASP9 protein	22001388
CASP9	alvocidib	alvocidib affects the cleavage of CASP9 protein	10896673
CASP9	alvocidib	[alvocidib co-treated with ethyl 2-amino-6-bromo-4-(1-cyano-2-ethoxy-2-oxoethyl)-4H-chromene-3-carboxylate] results in increased cleavage of CASP9 protein	15634644
CASP9	alvocidib	alvocidib results in increased activity of CASP9 protein	12170773
CASP9	alvocidib	BCL2 protein mutant form inhibits the reaction [alvocidib results in increased activity of CASP9 protein]	12170773
CASP9	Amiloride	Amiloride promotes the reaction [TNFSF10 protein results in increased cleavage of and results in increased activity of CASP9 protein]	16059913
CASP9	Aminolevulinic Acid	Aminolevulinic Acid analog results in increased activity of CASP9 protein	17245620|21138480
CASP9	Aminolevulinic Acid	anthra(1,9-cd)pyrazol-6(2H)-one inhibits the reaction [Aminolevulinic Acid analog results in increased activity of CASP9 protein]	21138480
CASP9	Amiodarone	Amiodarone results in increased expression of CASP9 mRNA	19774075
CASP9	Amiodarone	[TNFSF10 co-treated with Amiodarone] results in increased cleavage of CASP9 protein	21292685
CASP9	anacardic acid	[anacardic acid co-treated with TNF protein] results in increased cleavage of CASP9 protein	18349320
CASP9	andrographolide	[andrographolide co-treated with Cisplatin] results in increased expression of CASP9 mRNA	24563380
CASP9	andrographolide	andrographolide results in increased activity of CASP9 protein	19097688
CASP9	andrographolide	andrographolide results in increased expression of CASP9 mRNA	24563380
CASP9	andrographolide	CASP8 affects the reaction [Fluorouracil promotes the reaction [andrographolide results in increased activity of CASP9 protein]]	19097688
CASP9	andrographolide	Fluorouracil promotes the reaction [andrographolide results in increased activity of CASP9 protein]	19097688
CASP9	Anisomycin	Anisomycin promotes the reaction [Indomethacin results in increased activity of CASP9 protein]	17341418
CASP9	anthra(1,9-cd)pyrazol-6(2H)-one	anthra(1,9-cd)pyrazol-6(2H)-one inhibits the reaction [5-((4-methylphenyl)methylene)-2-(phenylamino)-4(5H)-thiazolone results in increased cleavage of CASP9 protein]	15831436
CASP9	anthra(1,9-cd)pyrazol-6(2H)-one	anthra(1,9-cd)pyrazol-6(2H)-one inhibits the reaction [6-(N,N-dimethylamino)-2-(naphthalene-1-yl)-4-quinazolinone results in increased expression of CASP9 protein]	23212307
CASP9	anthra(1,9-cd)pyrazol-6(2H)-one	anthra(1,9-cd)pyrazol-6(2H)-one inhibits the reaction [Aminolevulinic Acid analog results in increased activity of CASP9 protein]	21138480
CASP9	anthra(1,9-cd)pyrazol-6(2H)-one	anthra(1,9-cd)pyrazol-6(2H)-one inhibits the reaction [dehydroxymethylepoxyquinomicin results in increased cleavage of CASP9 protein]	15501958
CASP9	anthra(1,9-cd)pyrazol-6(2H)-one	anthra(1,9-cd)pyrazol-6(2H)-one inhibits the reaction [Indomethacin results in increased activity of CASP9 protein]	17341418
CASP9	anthra(1,9-cd)pyrazol-6(2H)-one	anthra(1,9-cd)pyrazol-6(2H)-one inhibits the reaction [Pt(O,O'-acac)(gamma-acac)(DMS) results in increased activity of CASP9 protein]	21420390
CASP9	anthra(1,9-cd)pyrazol-6(2H)-one	anthra(1,9-cd)pyrazol-6(2H)-one results in increased activity of CASP9 protein	15034932
CASP9	anthraceno(1,2-c)(1,2,5)selenadiazolo-6,11-dione	anthraceno(1,2-c)(1,2,5)selenadiazolo-6,11-dione results in increased cleavage of CASP9 protein	19146838
CASP9	Anthraquinones	Anthraquinones analog results in increased cleavage of CASP9 protein	19686834
CASP9	antibiotic G 418	antibiotic G 418 results in increased activity of CASP9 protein	15241557
CASP9	antibiotic G 418	benzyloxycarbonyl-leucyl-glutamyl-histidyl-aspartic acid fluoromethyl ketone inhibits the reaction [antibiotic G 418 results in increased activity of CASP9 protein]	15241557
CASP9	apicidin	apicidin results in increased activity of CASP9 protein	18313654|19070610
CASP9	Apigenin	Apigenin results in increased cleavage of CASP9 protein	15486995|19397994
CASP9	Apigenin	[polylactic acid-polyglycolic acid copolymer co-treated with Apigenin] results in increased expression of CASP9 mRNA	24070738
CASP9	Apigenin	[polylactic acid-polyglycolic acid copolymer co-treated with Apigenin] results in increased expression of CASP9 protein	24070738
CASP9	Arachidonic Acid	Arachidonic Acid results in increased activity of CASP9 protein	19540902|19720122
CASP9	Arsenic	Arsenic results in increased expression of CASP9 mRNA	11134558
CASP9	arsenic trioxide	17-(dimethylaminoethylamino)-17-demethoxygeldanamycin promotes the reaction [arsenic trioxide results in increased cleavage of CASP9 protein]	19371599
CASP9	arsenic trioxide	3,4-dihydro-5-(4-(1-piperidinyl)butoxy)-1(2H)-isoquinolinone inhibits the reaction [[arsenic trioxide co-treated with phytosphingosine] results in increased activity of CASP9 protein]	17237268
CASP9	arsenic trioxide	Acetylcysteine inhibits the reaction [arsenic trioxide promotes the reaction [Poly I-C results in increased activity of CASP9 protein]]	21418039
CASP9	arsenic trioxide	Acetylcysteine inhibits the reaction [arsenic trioxide results in increased activity of CASP9 protein]	19771260
CASP9	arsenic trioxide	Acetylcysteine inhibits the reaction [Poly I-C promotes the reaction [arsenic trioxide results in increased activity of CASP9 protein]]	21418039
CASP9	arsenic trioxide	AKT1 mutant form promotes the reaction [arsenic trioxide results in increased cleavage of CASP9 protein]	21655183
CASP9	arsenic trioxide	ARL6IP5 protein promotes the reaction [arsenic trioxide results in increased cleavage of CASP9 protein]	18387645
CASP9	arsenic trioxide	arsenic trioxide analog results in increased cleavage of and results in increased activity of CASP9 protein	22753750
CASP9	arsenic trioxide	[arsenic trioxide co-treated with phytosphingosine] results in increased activity of CASP9 protein	17237268
CASP9	arsenic trioxide	arsenic trioxide promotes the reaction [lonidamine results in increased cleavage of and results in increased activity of CASP9 protein]	21889928
CASP9	arsenic trioxide	arsenic trioxide promotes the reaction [Poly I-C results in increased activity of CASP9 protein]	21418039
CASP9	arsenic trioxide	arsenic trioxide results in decreased expression of CASP9 protein	22963400
CASP9	arsenic trioxide	arsenic trioxide results in increased activity of CASP9 protein	12148893|12492118|12883267|12975549|15493360|16010437|16646077|17673311|19771260|20138156|20219070|20534739|20953137|21061466|21418039|23239002|23737871
CASP9	arsenic trioxide	arsenic trioxide results in increased cleavage of and results in increased activity of CASP9 protein	17374990|19408305|19695276|21889928|23041229
CASP9	arsenic trioxide	arsenic trioxide results in increased cleavage of CASP9 protein	12480548|18387645|18491231|19371599|19468689|20408844|20657188|20723298|21655183
CASP9	arsenic trioxide	BCL2L11 mutant form inhibits the reaction [arsenic trioxide results in increased cleavage of CASP9 protein]	21655183
CASP9	arsenic trioxide	BCL2 protein inhibits the reaction [arsenic trioxide promotes the reaction [lonidamine results in increased cleavage of and results in increased activity of CASP9 protein]]	21889928
CASP9	arsenic trioxide	BCL2 protein inhibits the reaction [lonidamine promotes the reaction [arsenic trioxide results in increased cleavage of and results in increased activity of CASP9 protein]]	21889928
CASP9	arsenic trioxide	[bortezomib co-treated with arsenic trioxide] results in increased activity of CASP9 protein	21518486
CASP9	arsenic trioxide	bortezomib promotes the reaction [arsenic trioxide results in increased activity of CASP9 protein]	20471514
CASP9	arsenic trioxide	[Curcumin co-treated with arsenic trioxide] results in increased cleavage of CASP9 protein	20605902
CASP9	arsenic trioxide	Deoxyglucose promotes the reaction [arsenic trioxide results in increased cleavage of and results in increased activity of CASP9 protein]	23041229
CASP9	arsenic trioxide	Fluorouracil promotes the reaction [arsenic trioxide results in decreased expression of CASP9 protein]	22963400
CASP9	arsenic trioxide	Genistein promotes the reaction [arsenic trioxide results in increased activity of CASP9 protein]	20219070
CASP9	arsenic trioxide	KNK 437 promotes the reaction [arsenic trioxide results in increased cleavage of CASP9 protein]	19371599
CASP9	arsenic trioxide	lonidamine promotes the reaction [arsenic trioxide results in increased cleavage of and results in increased activity of CASP9 protein]	21889928
CASP9	arsenic trioxide	MAPK8 protein affects the reaction [arsenic trioxide results in increased activity of CASP9 protein]	20534739
CASP9	arsenic trioxide	MIR203A protein promotes the reaction [arsenic trioxide results in increased activity of CASP9 protein]	23737871
CASP9	arsenic trioxide	Poly I-C promotes the reaction [arsenic trioxide results in increased activity of CASP9 protein]	21418039
CASP9	arsenic trioxide	salvin promotes the reaction [arsenic trioxide results in increased activity of CASP9 protein]	23239002
CASP9	arsenic trioxide	SB 203580 inhibits the reaction [[arsenic trioxide co-treated with phytosphingosine] results in increased activity of CASP9 protein]	17237268
CASP9	arsenic trioxide	STMN1 inhibits the reaction [arsenic trioxide results in increased cleavage of CASP9 protein]	20657188
CASP9	arsenic trioxide	[Sulindac co-treated with arsenic trioxide] results in increased activity of CASP9 protein	18281123
CASP9	arsenic trioxide	TNF protein promotes the reaction [arsenic trioxide results in increased activity of CASP9 protein]	17673311
CASP9	arsenite	arsenite affects the expression of CASP9 protein	20083129
CASP9	arsenite	[arsenite results in decreased activity of PARP1 protein] which results in decreased cleavage of and results in decreased activity of CASP9 protein	22387748
CASP9	arsenite	arsenite results in decreased cleavage of and results in decreased activity of CASP9 protein	22387748
CASP9	arsenite	arsenite results in increased cleavage of CASP9 protein	17553788
CASP9	AS602868	AS602868 results in increased cleavage of and results in increased activity of CASP9 protein	18182997
CASP9	AS602868	irinotecan promotes the reaction [AS602868 results in increased cleavage of and results in increased activity of CASP9 protein]	18182997
CASP9	Ascorbic Acid	Ascorbic Acid inhibits the reaction [TNFSF10 protein results in increased activity of CASP9 protein]	23711929
CASP9	Aspirin	Aspirin inhibits the reaction [Deoxycholic Acid results in increased activity of CASP9 protein]	17644113
CASP9	Aspirin	Aspirin inhibits the reaction [Hydrogen Peroxide results in increased activity of CASP9 protein]	14753751
CASP9	Aspirin	Aspirin results in increased activity of CASP9 protein	11034327
CASP9	Aspirin	Aspirin results in increased cleavage of and results in increased activity of CASP9 protein	15481331
CASP9	Aspirin	BCL2 protein inhibits the reaction [[TNFSF10 protein co-treated with Aspirin] results in increased cleavage of and results in increased activity of CASP9 protein]	16199534
CASP9	Aspirin	[TNFSF10 protein co-treated with Aspirin] results in increased cleavage of and results in increased activity of CASP9 protein	16199534
CASP9	atorvastatin	[atorvastatin co-treated with celecoxib] results in increased cleavage of CASP9 protein	18172863
CASP9	atorvastatin	atorvastatin results in increased activity of CASP9 protein	15705602|16470222
CASP9	Atrazine	Atrazine results in increased expression of CASP9 mRNA	21333729
CASP9	Atrazine	kolaviron inhibits the reaction [Atrazine results in increased expression of CASP9 mRNA]	21333729
CASP9	Auranofin	Auranofin results in decreased expression of and results in increased cleavage of CASP9 protein	20542334
CASP9	azadirachtin	azadirachtin results in increased expression of CASP9 mRNA	20429769
CASP9	azadirachtin	azadirachtin results in increased expression of CASP9 protein	20429769
CASP9	azadiradione	azadiradione results in increased activity of CASP9 protein	21381696
CASP9	baohuoside I	baohuoside I results in increased activity of CASP9 protein	19289254
CASP9	baohuoside I	baohuoside I results in increased cleavage of CASP9 protein	22687635
CASP9	BDMC-A	BDMC-A results in increased cleavage of CASP9 protein	24365254
CASP9	Beclomethasone	Beclomethasone results in increased activity of CASP9 protein	11734450
CASP9	belinostat	belinostat results in increased cleavage of CASP9 protein	18223231
CASP9	belinostat	bortezomib promotes the reaction [belinostat results in increased cleavage of CASP9 protein]	18223231
CASP9	bendamustine	bendamustine results in increased activity of CASP9 protein	12948851
CASP9	bendamustine	Cladribine promotes the reaction [bendamustine results in increased activity of CASP9 protein]	12948851
CASP9	Benzene	Benzene results in increased expression of CASP9 mRNA	19162166
CASP9	benzo(e)pyrene	benzo(e)pyrene results in increased activity of CASP9 protein	18586875|19959636
CASP9	benzo(e)pyrene	Genistein inhibits the reaction [benzo(e)pyrene results in increased activity of CASP9 protein]	19959636
CASP9	benzo(e)pyrene	resveratrol inhibits the reaction [benzo(e)pyrene results in increased activity of CASP9 protein]	19959636
CASP9	Benzo(a)pyrene	Benzo(a)pyrene results in increased cleavage of CASP9 protein	16041517
CASP9	Benzo(a)pyrene	Benzo(a)pyrene results in increased expression of CASP9 mRNA	21393351|24239969
CASP9	Benzo(a)pyrene	Nitrogen Oxides inhibits the reaction [Benzo(a)pyrene results in increased cleavage of CASP9 protein]	16041517
CASP9	7,8-Dihydro-7,8-dihydroxybenzo(a)pyrene 9,10-oxide	7,8-Dihydro-7,8-dihydroxybenzo(a)pyrene 9,10-oxide results in increased cleavage of CASP9 protein	21983885
CASP9	7,8-Dihydro-7,8-dihydroxybenzo(a)pyrene 9,10-oxide	TP53 protein affects the reaction [7,8-Dihydro-7,8-dihydroxybenzo(a)pyrene 9,10-oxide results in increased cleavage of CASP9 protein]	21983885
CASP9	benzoylcarbonyl-aspartyl-glutamyl-valyl-aspartyl-fluoromethyl ketone	benzoylcarbonyl-aspartyl-glutamyl-valyl-aspartyl-fluoromethyl ketone inhibits the reaction [irinotecan results in increased activity of CASP9 protein]	22898888
CASP9	benzoylcarbonyl-aspartyl-glutamyl-valyl-aspartyl-fluoromethyl ketone	benzoylcarbonyl-aspartyl-glutamyl-valyl-aspartyl-fluoromethyl ketone inhibits the reaction [Mustard Gas results in increased activity of CASP9 protein]	20226831
CASP9	benzoylcarbonyl-valyl-aspartyl-valyl-alanyl-aspartyl-fluoromethyl ketone	benzoylcarbonyl-valyl-aspartyl-valyl-alanyl-aspartyl-fluoromethyl ketone inhibits the reaction [bortezomib results in increased cleavage of and results in increased activity of CASP9 protein]	18723477
CASP9	benzoylcarbonyl-valyl-aspartyl-valyl-alanyl-aspartyl-fluoromethyl ketone	benzoylcarbonyl-valyl-aspartyl-valyl-alanyl-aspartyl-fluoromethyl ketone inhibits the reaction [docetaxel results in increased cleavage of and results in increased activity of CASP9 protein]	17308071
CASP9	benzoylcarbonyl-valyl-aspartyl-valyl-alanyl-aspartyl-fluoromethyl ketone	benzoylcarbonyl-valyl-aspartyl-valyl-alanyl-aspartyl-fluoromethyl ketone inhibits the reaction [silybin results in increased cleavage of and results in increased activity of CASP9 protein]	16777994
CASP9	benzyloxycarbonyl-isoleucyl-glutamyl-threonyl-aspartic acid fluoromethyl ketone	benzyloxycarbonyl-isoleucyl-glutamyl-threonyl-aspartic acid fluoromethyl ketone inhibits the reaction [3-methyladenine promotes the reaction [ABT-737 promotes the reaction [celecoxib results in increased cleavage of CASP9 protein]]]	20104024
CASP9	benzyloxycarbonyl-isoleucyl-glutamyl-threonyl-aspartic acid fluoromethyl ketone	benzyloxycarbonyl-isoleucyl-glutamyl-threonyl-aspartic acid fluoromethyl ketone inhibits the reaction [3-methyladenine promotes the reaction [celecoxib promotes the reaction [ABT-737 results in increased cleavage of CASP9 protein]]]	20104024
CASP9	benzyloxycarbonyl-isoleucyl-glutamyl-threonyl-aspartic acid fluoromethyl ketone	benzyloxycarbonyl-isoleucyl-glutamyl-threonyl-aspartic acid fluoromethyl ketone inhibits the reaction [ABT-737 promotes the reaction [celecoxib results in increased cleavage of CASP9 protein]]	20104024
CASP9	benzyloxycarbonyl-isoleucyl-glutamyl-threonyl-aspartic acid fluoromethyl ketone	benzyloxycarbonyl-isoleucyl-glutamyl-threonyl-aspartic acid fluoromethyl ketone inhibits the reaction [celecoxib promotes the reaction [ABT-737 results in increased cleavage of CASP9 protein]]	20104024
CASP9	benzyloxycarbonyl-isoleucyl-glutamyl-threonyl-aspartic acid fluoromethyl ketone	benzyloxycarbonyl-isoleucyl-glutamyl-threonyl-aspartic acid fluoromethyl ketone inhibits the reaction [Mustard Gas results in increased activity of CASP9 protein]	20226831
CASP9	benzyloxycarbonyl-isoleucyl-glutamyl-threonyl-aspartic acid fluoromethyl ketone	benzyloxycarbonyl-isoleucyl-glutamyl-threonyl-aspartic acid fluoromethyl ketone inhibits the reaction [[Niflumic Acid co-treated with ciglitazone] results in increased cleavage of CASP9 protein]	21067863
CASP9	benzyloxycarbonyl-isoleucyl-glutamyl-threonyl-aspartic acid fluoromethyl ketone	benzyloxycarbonyl-isoleucyl-glutamyl-threonyl-aspartic acid fluoromethyl ketone inhibits the reaction [nimesulide results in increased cleavage of and results in increased activity of CASP9 protein]	19360361
CASP9	benzyloxycarbonyl-isoleucyl-glutamyl-threonyl-aspartic acid fluoromethyl ketone	benzyloxycarbonyl-isoleucyl-glutamyl-threonyl-aspartic acid fluoromethyl ketone inhibits the reaction [[resveratrol results in increased activity of CASP8 protein] which results in increased activity of CASP9 protein]	19423619
CASP9	benzyloxycarbonyl-leucyl-glutamyl-histidyl-aspartic acid fluoromethyl ketone	benzyloxycarbonyl-leucyl-glutamyl-histidyl-aspartic acid fluoromethyl ketone affects the reaction [rubimaillin results in increased activity of CASP9 protein]	19716835
CASP9	benzyloxycarbonyl-leucyl-glutamyl-histidyl-aspartic acid fluoromethyl ketone	benzyloxycarbonyl-leucyl-glutamyl-histidyl-aspartic acid fluoromethyl ketone inhibits the reaction [antibiotic G 418 results in increased activity of CASP9 protein]	15241557
CASP9	benzyloxycarbonyl-leucyl-glutamyl-histidyl-aspartic acid fluoromethyl ketone	benzyloxycarbonyl-leucyl-glutamyl-histidyl-aspartic acid fluoromethyl ketone inhibits the reaction [bortezomib results in increased cleavage of and results in increased activity of CASP9 protein]	18723477
CASP9	benzyloxycarbonyl-leucyl-glutamyl-histidyl-aspartic acid fluoromethyl ketone	benzyloxycarbonyl-leucyl-glutamyl-histidyl-aspartic acid fluoromethyl ketone inhibits the reaction [[Cisplatin co-treated with FASLG protein] results in increased activity of CASP9 protein]	17574045
CASP9	benzyloxycarbonyl-leucyl-glutamyl-histidyl-aspartic acid fluoromethyl ketone	benzyloxycarbonyl-leucyl-glutamyl-histidyl-aspartic acid fluoromethyl ketone inhibits the reaction [danthron results in increased activity of CASP9 protein]	21126053
CASP9	benzyloxycarbonyl-leucyl-glutamyl-histidyl-aspartic acid fluoromethyl ketone	benzyloxycarbonyl-leucyl-glutamyl-histidyl-aspartic acid fluoromethyl ketone inhibits the reaction [erythritol anhydride results in increased activity of CASP9 protein]	14998682
CASP9	benzyloxycarbonyl-leucyl-glutamyl-histidyl-aspartic acid fluoromethyl ketone	benzyloxycarbonyl-leucyl-glutamyl-histidyl-aspartic acid fluoromethyl ketone inhibits the reaction [irinotecan results in increased activity of CASP9 protein]	22898888
CASP9	benzyloxycarbonyl-leucyl-glutamyl-histidyl-aspartic acid fluoromethyl ketone	benzyloxycarbonyl-leucyl-glutamyl-histidyl-aspartic acid fluoromethyl ketone results in decreased activity of CASP9 protein	15476743
CASP9	benzyloxycarbonyl-leucyl-glutamyl-histidyl-aspartic acid fluoromethyl ketone	[benzyloxycarbonyl-leucyl-glutamyl-histidyl-aspartic acid fluoromethyl ketone results in decreased activity of CASP9 protein] affects the reaction [SOD2 protein results in decreased susceptibility to Doxorubicin]	18594523
CASP9	benzyloxycarbonyl-leucyl-glutamyl-histidyl-aspartic acid fluoromethyl ketone	[benzyloxycarbonyl-leucyl-glutamyl-histidyl-aspartic acid fluoromethyl ketone results in decreased activity of CASP9 protein] affects the reaction [SOD2 protein results in decreased susceptibility to Paclitaxel]	18594523
CASP9	benzyloxycarbonyl-leucyl-glutamyl-histidyl-aspartic acid fluoromethyl ketone	[benzyloxycarbonyl-leucyl-glutamyl-histidyl-aspartic acid fluoromethyl ketone results in decreased activity of CASP9 protein] which results in decreased susceptibility to 10-methoxy-2,2-dimethyl-2,6-dihydropyrano(3,2-c)quinolin-5-one	20833157
CASP9	benzyloxycarbonyl-leucyl-glutamyl-histidyl-aspartic acid fluoromethyl ketone	[benzyloxycarbonyl-leucyl-glutamyl-histidyl-aspartic acid fluoromethyl ketone results in decreased activity of CASP9 protein] which results in decreased susceptibility to 1-(3',4',5'-trimethoxyphenyl)-3-(3'',4''-dimethoxy-2'-hydroxyphenyl)propane	20674558
CASP9	benzyloxycarbonyl-leucyl-glutamyl-histidyl-aspartic acid fluoromethyl ketone	[benzyloxycarbonyl-leucyl-glutamyl-histidyl-aspartic acid fluoromethyl ketone results in decreased activity of CASP9 protein] which results in decreased susceptibility to Doxorubicin	18594523
CASP9	benzyloxycarbonyl-leucyl-glutamyl-histidyl-aspartic acid fluoromethyl ketone	[benzyloxycarbonyl-leucyl-glutamyl-histidyl-aspartic acid fluoromethyl ketone results in decreased activity of CASP9 protein] which results in decreased susceptibility to methyl antcinate A	20557081
CASP9	benzyloxycarbonyl-leucyl-glutamyl-histidyl-aspartic acid fluoromethyl ketone	[benzyloxycarbonyl-leucyl-glutamyl-histidyl-aspartic acid fluoromethyl ketone results in decreased activity of CASP9 protein] which results in decreased susceptibility to Paclitaxel	18594523
CASP9	benzyloxycarbonyl-leucyl-glutamyl-histidyl-aspartic acid fluoromethyl ketone	[benzyloxycarbonyl-leucyl-glutamyl-histidyl-aspartic acid fluoromethyl ketone results in decreased activity of CASP9 protein] which results in decreased susceptibility to TNFSF10 protein	23711929
CASP9	benzyloxycarbonylleucyl-leucyl-leucine aldehyde	benzyloxycarbonylleucyl-leucyl-leucine aldehyde results in increased cleavage of and results in increased activity of CASP9 protein	15498850
CASP9	benzyloxycarbonyl-valyl-alanyl-aspartic acid	benzyloxycarbonyl-valyl-alanyl-aspartic acid analog inhibits the reaction [[gambogic acid co-treated with bortezomib] results in increased activity of CASP9 protein]	24291039
CASP9	benzyloxycarbonyl-valyl-alanyl-aspartic acid	benzyloxycarbonyl-valyl-alanyl-aspartic acid analog inhibits the reaction [Lithocholic Acid results in increased cleavage of and results in increased activity of CASP9 protein]	19054763
CASP9	benzyloxycarbonyl-valyl-alanyl-aspartic acid	benzyloxycarbonyl-valyl-alanyl-aspartic acid analog inhibits the reaction [NCQ 344 results in increased activity of CASP9 protein]	10996300
CASP9	benzyloxycarbonyl-valyl-alanyl-aspartic acid	benzyloxycarbonyl-valyl-alanyl-aspartic acid analog inhibits the reaction [NCQ 436 results in increased activity of CASP9 protein]	10996300
CASP9	Berberine	Berberine results in increased cleavage of CASP9 protein	16505103
CASP9	Estradiol	Estradiol results in decreased expression of CASP9 mRNA	23373633
CASP9	Estradiol	Estradiol results in increased activity of CASP9 protein	19095654
CASP9	beta-solamarine	beta-solamarine promotes the reaction [Cisplatin results in increased activity of CASP9 protein]	17619073
CASP9	beta-solamarine	beta-solamarine results in increased activity of CASP9 protein	17619073
CASP9	beta-solamarine	beta-solamarine results in increased cleavage of CASP9 protein	20647040
CASP9	bisphenol A	bisphenol A results in increased expression of CASP9 protein	21277958
CASP9	BMS 310705	BMS 310705 results in increased activity of CASP9 protein	14529678
CASP9	bortezomib	1,2-Dihydroxybenzene-3,5-Disulfonic Acid Disodium Salt affects the reaction [bortezomib results in increased cleavage of CASP9 protein]	15509775
CASP9	bortezomib	AKT1 protein inhibits the reaction [[bortezomib co-treated with sorafenib] results in increased cleavage of CASP9 protein]	16985072
CASP9	bortezomib	benzoylcarbonyl-valyl-aspartyl-valyl-alanyl-aspartyl-fluoromethyl ketone inhibits the reaction [bortezomib results in increased cleavage of and results in increased activity of CASP9 protein]	18723477
CASP9	bortezomib	benzyloxycarbonyl-leucyl-glutamyl-histidyl-aspartic acid fluoromethyl ketone inhibits the reaction [bortezomib results in increased cleavage of and results in increased activity of CASP9 protein]	18723477
CASP9	bortezomib	benzyloxycarbonyl-valyl-alanyl-aspartic acid analog inhibits the reaction [[gambogic acid co-treated with bortezomib] results in increased activity of CASP9 protein]	24291039
CASP9	bortezomib	[bortezomib co-treated with 1-(2-cyano-3,12-dioxooleana-1,9-dien-28-oyl) imidazole] results in increased activity of CASP9 protein	15070698
CASP9	bortezomib	[bortezomib co-treated with arsenic trioxide] results in increased activity of CASP9 protein	21518486
CASP9	bortezomib	[bortezomib co-treated with Butyrates] results in increased cleavage of and results in increased activity of CASP9 protein	12893773
CASP9	bortezomib	[bortezomib co-treated with sorafenib] results in increased cleavage of CASP9 protein	16985072
CASP9	bortezomib	[bortezomib co-treated with TNFSF10 protein] results in increased cleavage of CASP9 protein	17620439|19261616
CASP9	bortezomib	[bortezomib co-treated with trichostatin A] results in increased cleavage of and results in increased activity of CASP9 protein	16904634
CASP9	bortezomib	[bortezomib co-treated with vorinostat] results in increased activity of CASP9 protein	18005386|18641367
CASP9	bortezomib	[bortezomib co-treated with vorinostat] results in increased cleavage of and results in increased activity of CASP9 protein	12893773
CASP9	bortezomib	bortezomib promotes the reaction [abexinostat results in increased cleavage of CASP9 protein]	19417023
CASP9	bortezomib	bortezomib promotes the reaction [arsenic trioxide results in increased activity of CASP9 protein]	20471514
CASP9	bortezomib	bortezomib promotes the reaction [belinostat results in increased cleavage of CASP9 protein]	18223231
CASP9	bortezomib	bortezomib promotes the reaction [Butyrates results in increased activity of CASP9 protein]	15173093
CASP9	bortezomib	bortezomib promotes the reaction [romidepsin results in increased cleavage of CASP9 protein]	18223231
CASP9	bortezomib	bortezomib promotes the reaction [vorinostat results in increased activity of CASP9 protein]	15173093
CASP9	bortezomib	bortezomib results in increased cleavage of and results in increased activity of CASP9 protein	16024631|17510429|17898787|18723477
CASP9	bortezomib	bortezomib results in increased cleavage of CASP9 protein	15509775|16118318|16617327|16778179|17626072|17898295|18223231|19417023|20051518
CASP9	bortezomib	bortezomib results in increased expression of CASP9 protein	17156654
CASP9	bortezomib	[bortezomib results in increased susceptibility to and results in increased activity of TNFSF10 protein] which results in increased cleavage of CASP9 protein	17326159
CASP9	bortezomib	CASP2 protein affects the reaction [bortezomib results in increased cleavage of and results in increased activity of CASP9 protein]	18723477
CASP9	bortezomib	CASP9 gene SNP results in increased susceptibility to bortezomib	20864405
CASP9	bortezomib	CASP9 results in increased susceptibility to bortezomib	18723477
CASP9	bortezomib	[gambogic acid co-treated with bortezomib] results in increased activity of CASP9 protein	24291039
CASP9	bortezomib	[lonafarnib co-treated with bortezomib] results in increased cleavage of CASP9 protein	16118318
CASP9	bortezomib	[nutlin 3 co-treated with bortezomib] results in increased activity of CASP9 protein	20850924
CASP9	bortezomib	SCIO-469 promotes the reaction [bortezomib results in increased cleavage of CASP9 protein]	16617327
CASP9	bortezomib	TNFSF10 protein promotes the reaction [bortezomib results in increased cleavage of CASP9 protein]	17510429
CASP9	bortezomib	[trichostatin A co-treated with bortezomib] results in increased cleavage of CASP9 protein	21345073
CASP9	8-Bromo Cyclic Adenosine Monophosphate	8-Bromo Cyclic Adenosine Monophosphate results in increased expression of CASP9 mRNA	22079614
CASP9	brucine	brucine results in increased activity of and results in increased cleavage of CASP9 protein	16443926
CASP9	brucine	brucine results in increased activity of CASP9 protein	21684292
CASP9	brucine	[brucine results in increased activity of CASP9 protein] which results in increased activity of CASP3 protein	16443926
CASP9	brucine	Cyclosporine inhibits the reaction [brucine results in increased activity of and results in increased cleavage of CASP9 protein]	16443926
CASP9	brucine	Cyclosporine inhibits the reaction [[brucine results in increased activity of CASP9 protein] which results in increased activity of CASP3 protein]	16443926
CASP9	Budesonide	Budesonide results in increased activity of CASP9 protein	11734450
CASP9	Bupivacaine	Bupivacaine results in decreased expression of CASP9 protein	20194319
CASP9	Bupropion	Bupropion results in increased activity of CASP9 protein	21354251
CASP9	Buserelin	Buserelin results in increased expression of CASP9 protein	15965100
CASP9	Busulfan	[clofarabine co-treated with fludarabine co-treated with Busulfan] results in increased cleavage of CASP9 protein	20933509
CASP9	Busulfan	pifithrin inhibits the reaction [[decitabine co-treated with Busulfan] results in increased activity of CASP9 protein]	19732952
CASP9	Butoxamine	Butoxamine results in increased cleavage of CASP9 protein	19106745
CASP9	tert-Butylhydroperoxide	tert-Butylhydroperoxide results in increased cleavage of CASP9 protein	17003459
CASP9	butylidenephthalide	butylidenephthalide results in increased cleavage of CASP9 protein	16987298
CASP9	Butyrates	[bortezomib co-treated with Butyrates] results in increased cleavage of and results in increased activity of CASP9 protein	12893773
CASP9	Butyrates	bortezomib promotes the reaction [Butyrates results in increased activity of CASP9 protein]	15173093
CASP9	Butyrates	Butyrates results in increased activity of and results in increased cleavage of CASP9 protein	20346929
CASP9	Butyrates	Butyrates results in increased activity of CASP9 protein	15173093|15177505|15213223
CASP9	Butyrates	GSN protein inhibits the reaction [Butyrates results in increased activity of CASP9 protein]	15213223
CASP9	C60-bis(N,N-dimethylpyrrolidinium)	C60-bis(N,N-dimethylpyrrolidinium) results in increased activity of CASP9 protein	19905986
CASP9	Cadmium	Cadmium results in increased cleavage of and results in increased activity of CASP9 protein	19442655
CASP9	cadmium acetate	Acetylcysteine inhibits the reaction [cadmium acetate results in increased activity of CASP9 protein]	16169029
CASP9	cadmium acetate	cadmium acetate results in increased activity of CASP9 protein	15450950|16169029
CASP9	Cadmium Chloride	Cadmium Chloride results in increased activity of CASP9 protein	16264267
CASP9	cadmium telluride	cadmium telluride results in increased cleavage of and results in increased activity of CASP9 protein	21291946
CASP9	Caffeine	Caffeine inhibits the reaction [silybin results in increased cleavage of and results in increased activity of CASP9 protein]	16777994
CASP9	Caffeine	Caffeine results in increased cleavage of and results in increased expression of CASP9 protein	16522534
CASP9	cajanol	[[[cajanol results in decreased expression of BCL2 protein] co-treated with [cajanol results in increased expression of BAX protein]] affects the localization of CYCS protein] which results in increased activity of CASP9 protein	20638373
CASP9	cajanol	cajanol results in increased activity of CASP9 protein	20638373
CASP9	Camptothecin	[Camptothecin co-treated with FAS protein] results in increased activity of CASP9 protein	15958570
CASP9	Camptothecin	[Camptothecin co-treated with FAS protein] results in increased cleavage of CASP9 protein	19633536
CASP9	Camptothecin	Camptothecin results in increased cleavage of CASP9 protein	10896673
CASP9	Capsaicin	[Capsaicin co-treated with TNFSF10 protein] results in increased cleavage of CASP9 protein	19939880
CASP9	Capsaicin	Capsaicin promotes the reaction [TNFSF10 results in increased activity of CASP9 protein]	22200406
CASP9	Capsaicin	Capsaicin results in increased activity of CASP9 protein	19502594|19699254|19855437|20925121|21859781
CASP9	Capsaicin	Capsaicin results in increased cleavage of CASP9 protein	21647434
CASP9	Capsaicin	Capsaicin results in increased expression of CASP9 mRNA	19502594
CASP9	Capsaicin	CAT protein inhibits the reaction [Capsaicin results in increased cleavage of CASP9 protein]	21647434
CASP9	Capsaicin	EUK-134 inhibits the reaction [Capsaicin results in increased cleavage of CASP9 protein]	21647434
CASP9	carboxycinnamic acid bishydroxamide	carboxycinnamic acid bishydroxamide results in increased cleavage of CASP9 protein	15897598
CASP9	Catechin	Catechin results in increased activity of CASP9 protein	20206613
CASP9	CD 437	CD 437 results in increased activity of CASP9 protein	10766194
CASP9	celecoxib	3-methyladenine promotes the reaction [ABT-737 promotes the reaction [celecoxib results in increased cleavage of CASP9 protein]]	20104024
CASP9	celecoxib	3-methyladenine promotes the reaction [celecoxib promotes the reaction [ABT-737 results in increased cleavage of CASP9 protein]]	20104024
CASP9	celecoxib	3-methyladenine promotes the reaction [celecoxib results in increased cleavage of CASP9 protein]	20104024
CASP9	celecoxib	[ABT-737 co-treated with celecoxib] results in increased activity of CASP9 protein	20104024
CASP9	celecoxib	ABT-737 promotes the reaction [celecoxib results in increased cleavage of CASP9 protein]	20104024
CASP9	celecoxib	ABT-737 promotes the reaction [wortmannin promotes the reaction [celecoxib results in increased cleavage of CASP9 protein]]	20104024
CASP9	celecoxib	[atorvastatin co-treated with celecoxib] results in increased cleavage of CASP9 protein	18172863
CASP9	celecoxib	benzyloxycarbonyl-isoleucyl-glutamyl-threonyl-aspartic acid fluoromethyl ketone inhibits the reaction [3-methyladenine promotes the reaction [ABT-737 promotes the reaction [celecoxib results in increased cleavage of CASP9 protein]]]	20104024
CASP9	celecoxib	benzyloxycarbonyl-isoleucyl-glutamyl-threonyl-aspartic acid fluoromethyl ketone inhibits the reaction [3-methyladenine promotes the reaction [celecoxib promotes the reaction [ABT-737 results in increased cleavage of CASP9 protein]]]	20104024
CASP9	celecoxib	benzyloxycarbonyl-isoleucyl-glutamyl-threonyl-aspartic acid fluoromethyl ketone inhibits the reaction [ABT-737 promotes the reaction [celecoxib results in increased cleavage of CASP9 protein]]	20104024
CASP9	celecoxib	benzyloxycarbonyl-isoleucyl-glutamyl-threonyl-aspartic acid fluoromethyl ketone inhibits the reaction [celecoxib promotes the reaction [ABT-737 results in increased cleavage of CASP9 protein]]	20104024
CASP9	celecoxib	celecoxib analog results in increased cleavage of and results in increased activity of CASP9 protein	15499625
CASP9	celecoxib	celecoxib promotes the reaction [ABT-737 results in increased cleavage of CASP9 protein]	20104024
CASP9	celecoxib	celecoxib promotes the reaction [docetaxel results in increased cleavage of and results in increased activity of CASP9 protein]	15688368
CASP9	celecoxib	celecoxib promotes the reaction [tetracycline CMT-3 results in increased cleavage of and results in increased activity of CASP9 protein]	15688368
CASP9	celecoxib	celecoxib results in increased activity of CASP9 protein	12824303
CASP9	celecoxib	celecoxib results in increased cleavage of and results in increased activity of CASP9 protein	15197583|15572759
CASP9	celecoxib	celecoxib results in increased cleavage of CASP9 protein	17612393|19665451|20104024
CASP9	celecoxib	docetaxel promotes the reaction [celecoxib results in increased cleavage of and results in increased activity of CASP9 protein]	15688368
CASP9	celecoxib	FADD mutant form inhibits the reaction [celecoxib results in increased cleavage of and results in increased activity of CASP9 protein]	15572759
CASP9	celecoxib	MAP1LC3B mutant form promotes the reaction [[celecoxib co-treated with ABT-737] results in increased cleavage of CASP9 protein]	20104024
CASP9	celecoxib	PIK3C3 mutant form promotes the reaction [[celecoxib co-treated with ABT-737] results in increased cleavage of CASP9 protein]	20104024
CASP9	celecoxib	tetracycline CMT-3 promotes the reaction [celecoxib results in increased cleavage of and results in increased activity of CASP9 protein]	15688368
CASP9	celecoxib	TNFSF10 protein promotes the reaction [celecoxib results in increased cleavage of and results in increased activity of CASP9 protein]	15572759
CASP9	celecoxib	wortmannin promotes the reaction [celecoxib results in increased cleavage of CASP9 protein]	20104024
CASP9	cerivastatin	cerivastatin results in increased activity of CASP9 protein	15705602|16470222
CASP9	CFM 1	CFM 1 results in increased activity of CASP9 protein	23826121
CASP9	Chalcone	Chalcone results in increased cleavage of CASP9 protein	20620131
CASP9	Chalcone	MYC protein affects the susceptibility to [Chalcone results in increased cleavage of CASP9 protein]	20620131
CASP9	chan su	chan su results in increased cleavage of and results in increased activity of CASP9 protein	16012733
CASP9	Chenodeoxycholic Acid	[Chenodeoxycholic Acid co-treated with tauroursodeoxycholic acid] results in increased activity of CASP9 protein	14976352
CASP9	Chenodeoxycholic Acid	Chenodeoxycholic Acid results in increased activity of CASP9 protein	14976352
CASP9	Chenodeoxycholic Acid	Chenodeoxycholic Acid results in increased cleavage of and results in increased activity of CASP9 protein	19054763
CASP9	Cladribine	BCL2 affects the reaction [Cladribine results in increased cleavage of and results in increased activity of CASP9 protein]	15516989
CASP9	Cladribine	Cladribine promotes the reaction [bendamustine results in increased activity of CASP9 protein]	12948851
CASP9	Cladribine	Cladribine results in increased activity of CASP9 protein	11672427|12948851
CASP9	Cladribine	Cladribine results in increased cleavage of and results in increased activity of CASP9 protein	15516989
CASP9	Chlorpyrifos	[Chlorpyrifos affects the localization of CASP9 protein] which results in increased activity of CYCS protein	23416140
CASP9	Chlorpyrifos	Chlorpyrifos results in increased expression of CASP9 protein modified form	23416140
CASP9	chromium hexavalent ion	chromium hexavalent ion results in increased activity of CASP9 protein	19556603
CASP9	chromium hexavalent ion	dipropylenetriamine-NONOate inhibits the reaction [chromium hexavalent ion results in increased activity of CASP9 protein]	19556603
CASP9	chromium hexavalent ion	pimagedine promotes the reaction [chromium hexavalent ion results in increased activity of CASP9 protein]	19556603
CASP9	chrysin	chrysin results in increased cleavage of CASP9 protein	18331776
CASP9	ciglitazone	benzyloxycarbonyl-isoleucyl-glutamyl-threonyl-aspartic acid fluoromethyl ketone inhibits the reaction [[Niflumic Acid co-treated with ciglitazone] results in increased cleavage of CASP9 protein]	21067863
CASP9	ciglitazone	DDIT3 mutant form inhibits the reaction [[Niflumic Acid co-treated with ciglitazone] results in increased cleavage of CASP9 protein]	21067863
CASP9	ciglitazone	[Niflumic Acid co-treated with ciglitazone] results in increased cleavage of CASP9 protein	21067863
CASP9	Cimetidine	Cimetidine results in increased activity of CASP9 protein	17273750|20127008
CASP9	cinobufotalin	cinobufotalin results in increased cleavage of CASP9 protein	22898211
CASP9	Ciprofloxacin	Ciprofloxacin results in increased activity of CASP9 protein	11875713
CASP9	clavulone II	clavulone II results in increased cleavage of and results in increased activity of CASP9 protein	15920677
CASP9	clivorine	clivorine results in increased activity of CASP9 protein	19437449
CASP9	clivorine	EGF protein inhibits the reaction [clivorine results in increased activity of CASP9 protein]	19437449
CASP9	clofarabine	[clofarabine co-treated with fludarabine co-treated with Busulfan] results in increased cleavage of CASP9 protein	20933509
CASP9	cobaltiprotoporphyrin	cobaltiprotoporphyrin inhibits the reaction [Deoxycholic Acid results in increased cleavage of CASP9 protein]	21362092
CASP9	Cocaine	Cocaine results in increased expression of CASP9 protein	16686379
CASP9	codonoposide	codonoposide results in increased activity of CASP9 protein	15863893
CASP9	Colchicine	Colchicine results in increased activity of CASP9 protein	22342440
CASP9	Copper	[Copper binds to Isatin binds to 2-(2-aminoethyl)pyridine] which results in increased cleavage of CASP9 protein	17327230
CASP9	Copper	[Copper binds to Isatin binds to trimethylenediamine] which results in increased cleavage of CASP9 protein	17327230
CASP9	Copper	[[Ditiocarb binds to Copper] which affects the localization of CYCS protein] promotes the reaction [[[CYCS protein binds to APAF1 protein binds to CASP9 protein] which results in increased metabolism of and results in increased activity of CASP9 protein] which results in increased activity of CASP3 protein]	22951949
CASP9	Copper	[Thiosemicarbazones binds to Copper] which results in increased expression of CASP9 protein	20931265
CASP9	cordycepin	Acetylcysteine inhibits the reaction [cordycepin results in increased activity of CASP9 protein]	21310227
CASP9	cordycepin	cordycepin results in increased activity of CASP9 protein	21310227|21933677
CASP9	Curcumin	[Curcumin co-treated with arsenic trioxide] results in increased cleavage of CASP9 protein	20605902
CASP9	Curcumin	[Curcumin co-treated with lonidamine] results in increased cleavage of CASP9 protein	20605902
CASP9	Curcumin	[Curcumin co-treated with Sirolimus] results in increased activity of CASP9 protein	19373661
CASP9	Curcumin	Curcumin results in decreased expression of CASP9 mRNA	16101141
CASP9	Curcumin	Curcumin results in decreased expression of CASP9 protein	17148446
CASP9	Curcumin	Curcumin results in increased activity of CASP9 protein	17671742
CASP9	Curcumin	Curcumin results in increased cleavage of and results in increased activity of CASP9 protein	16023083
CASP9	Curcumin	Curcumin results in increased cleavage of CASP9 protein	14555224|21594647
CASP9	Curcumin	Curcumin results in increased expression of CASP9 protein	18555241
CASP9	Cycloheximide	[Cycloheximide co-treated with TNF] results in increased activity of CASP9 protein	12925536
CASP9	Cycloheximide	[Cycloheximide co-treated with TNFSF10 protein] results in increased cleavage of and results in increased activity of CASP9 protein	18222423
CASP9	Cycloheximide	ITPK1 inhibits the reaction [[Cycloheximide co-treated with TNF] results in increased activity of CASP9 protein]	12925536
CASP9	Cyclophosphamide	BCL2 protein inhibits the reaction [Cyclophosphamide results in increased activity of CASP9 protein]	11723234
CASP9	Cyclophosphamide	Cyclophosphamide results in increased cleavage of and results in increased activity of CASP9 protein	17898787
CASP9	Cyclosporine	[Cyclosporine co-treated with NGF protein] results in increased activity of CASP9 protein	24244623
CASP9	Cyclosporine	Cyclosporine inhibits the reaction [brucine results in increased activity of and results in increased cleavage of CASP9 protein]	16443926
CASP9	Cyclosporine	Cyclosporine inhibits the reaction [[brucine results in increased activity of CASP9 protein] which results in increased activity of CASP3 protein]	16443926
CASP9	Cyclosporine	Cyclosporine inhibits the reaction [FAS protein results in increased activity of CASP9 protein]	15548389
CASP9	Cyclosporine	NGFR protein affects the reaction [[Cyclosporine co-treated with NGF protein] results in increased activity of CASP9 protein]	24244623
CASP9	cylindrospermopsin	cylindrospermopsin results in increased expression of CASP9 mRNA	23726867
CASP9	Dactinomycin	[Dactinomycin co-treated with TNFSF10 protein] results in increased activity of CASP9 protein	17707539
CASP9	danthron	benzyloxycarbonyl-leucyl-glutamyl-histidyl-aspartic acid fluoromethyl ketone inhibits the reaction [danthron results in increased activity of CASP9 protein]	21126053
CASP9	danthron	danthron results in increased activity of and results in increased expression of CASP9 protein	21126053
CASP9	danthron	danthron results in increased expression of CASP9 mRNA	21126053
CASP9	dasatinib	dasatinib results in increased activity of CASP9 protein	19398150
CASP9	dasatinib	dasatinib results in increased cleavage of CASP9 protein	18550857
CASP9	decamethrin	decamethrin results in increased activity of CASP9 protein	21555338
CASP9	decitabine	[decitabine affects the methylation of CASP9 gene] which affects the expression of CASP9 protein	18649362
CASP9	decitabine	[decitabine co-treated with TNFSF10 protein] results in increased activity of CASP9 protein	18636160
CASP9	decitabine	decitabine results in increased cleavage of CASP9 protein	18636160
CASP9	decitabine	pifithrin inhibits the reaction [[decitabine co-treated with Busulfan] results in increased activity of CASP9 protein]	19732952
CASP9	declopramide	declopramide results in increased activity of CASP9 protein	11953831
CASP9	dehydroxymethylepoxyquinomicin	anthra(1,9-cd)pyrazol-6(2H)-one inhibits the reaction [dehydroxymethylepoxyquinomicin results in increased cleavage of CASP9 protein]	15501958
CASP9	dehydroxymethylepoxyquinomicin	dehydroxymethylepoxyquinomicin results in increased cleavage of CASP9 protein	15501958
CASP9	Deoxycholic Acid	Aspirin inhibits the reaction [Deoxycholic Acid results in increased activity of CASP9 protein]	17644113
CASP9	Deoxycholic Acid	cobaltiprotoporphyrin inhibits the reaction [Deoxycholic Acid results in increased cleavage of CASP9 protein]	21362092
CASP9	Deoxycholic Acid	Deoxycholic Acid results in increased activity of CASP9 protein	17644113
CASP9	Deoxycholic Acid	Deoxycholic Acid results in increased cleavage of and results in increased activity of CASP9 protein	19054763
CASP9	Deoxycholic Acid	Deoxycholic Acid results in increased cleavage of CASP9 protein	21362092
CASP9	Deoxyglucose	[Deoxyglucose co-treated with Cisplatin] results in increased activity of CASP9 protein	20138251
CASP9	Deoxyglucose	Deoxyglucose promotes the reaction [arsenic trioxide results in increased cleavage of and results in increased activity of CASP9 protein]	23041229
CASP9	Deoxyglucose	Deoxyglucose results in increased cleavage of and results in increased activity of CASP9 protein	23041229
CASP9	deoxynivalenol	deoxynivalenol results in decreased expression of CASP9 protein	22269384
CASP9	deoxynivalenol	deoxynivalenol results in increased activity of CASP9 protein	22269384
CASP9	deoxynivalenol	deoxynivalenol results in increased expression of CASP9 protein	22269384
CASP9	destruxin B	destruxin B results in increased cleavage of and results in increased activity of CASP9 protein	23751424
CASP9	Dexamethasone	Dexamethasone results in increased activity of CASP9 protein	11734450|15574755|15576458
CASP9	Dexamethasone	Dexamethasone results in increased cleavage of CASP9 protein	16445836
CASP9	Dexamethasone	isocoumarin NM-3 promotes the reaction [Dexamethasone results in increased activity of CASP9 protein]	15574755
CASP9	Dexmedetomidine	Dexmedetomidine results in increased activity of CASP9 protein	18724006
CASP9	diallyl disulfide	diallyl disulfide results in increased activity of CASP9 protein	14522920
CASP9	Carboplatin	Carboplatin results in decreased expression of CASP9 mRNA	15576332|17404015
CASP9	Carboplatin	Carboplatin results in increased activity of CASP9 protein	15996812
CASP9	dibenzoylmethane	ODC1 protein inhibits the reaction [dibenzoylmethane results in increased activity of CASP9 protein]	21523861
CASP9	Cisplatin	[4-methylene-2-octyl-5-oxofuran-3-carboxylic acid co-treated with Cisplatin] results in increased activity of CASP9 protein	21442130
CASP9	Cisplatin	ABCB1 protein inhibits the reaction [Cisplatin results in increased activity of CASP9 protein]	22269388
CASP9	Cisplatin	Acetylcysteine inhibits the reaction [[Cisplatin co-treated with FASLG protein] results in increased activity of CASP9 protein]	17574045
CASP9	Cisplatin	Acetylcysteine inhibits the reaction [Cisplatin results in increased activity of CASP9 protein]	21166495
CASP9	Cisplatin	Acetylcysteine inhibits the reaction [Cisplatin results in increased cleavage of CASP9 protein]	15496615
CASP9	Cisplatin	acetyl-leucyl-glutamyl-histidyl-aspartal inhibits the reaction [Cisplatin results in increased activity of CASP9 protein]	23747833
CASP9	Cisplatin	acetyl-leucyl-glutamyl-histidyl-aspartal inhibits the reaction [[GJB1 protein co-treated with GJB2 protein] promotes the reaction [Cisplatin results in increased activity of CASP9 protein]]	23747833
CASP9	Cisplatin	[andrographolide co-treated with Cisplatin] results in increased expression of CASP9 mRNA	24563380
CASP9	Cisplatin	BCL2 inhibits the reaction [Cisplatin results in increased cleavage of CASP9 protein]	21618512
CASP9	Cisplatin	BCL2 protein inhibits the reaction [[Cisplatin co-treated with FASLG protein] results in increased activity of CASP9 protein]	17574045
CASP9	Cisplatin	benzyloxycarbonyl-leucyl-glutamyl-histidyl-aspartic acid fluoromethyl ketone inhibits the reaction [[Cisplatin co-treated with FASLG protein] results in increased activity of CASP9 protein]	17574045
CASP9	Cisplatin	beta-solamarine promotes the reaction [Cisplatin results in increased activity of CASP9 protein]	17619073
CASP9	Cisplatin	BMI1 protein inhibits the reaction [Cisplatin results in increased activity of CASP9 protein]	21311599
CASP9	Cisplatin	[Cisplatin co-treated with 2,5,7,8-tetramethyl-2R-(4R,8R,12-trimethyltridecyl)chroman-6-yloxy acetic acid] results in increased cleavage of CASP9 protein	21214929
CASP9	Cisplatin	[Cisplatin co-treated with Etoposide] results in increased activity of CASP9 protein	18676776
CASP9	Cisplatin	[Cisplatin co-treated with FASLG protein] results in increased activity of CASP9 protein	17574045
CASP9	Cisplatin	[Cisplatin co-treated with fisetin] promotes the reaction [CASP9 protein results in increased cleavage of CASP7 protein]	21216935
CASP9	Cisplatin	[Cisplatin co-treated with fisetin] results in increased cleavage of and results in increased activity of CASP9 protein	21216935
CASP9	Cisplatin	Cisplatin results in decreased expression of CASP9 mRNA	17404015
CASP9	Cisplatin	Cisplatin results in increased activity of CASP9 protein	12565868|14727531|16009487|16803524|17619073|21052098|21166495|21271225|21311599|21420390|23747833
CASP9	Cisplatin	Cisplatin results in increased cleavage of and results in increased activity of CASP9 protein	22285227
CASP9	Cisplatin	Cisplatin results in increased cleavage of CASP9 protein	15496615|18058806|19147209|20145152|21324178|21442237|21618512
CASP9	Cisplatin	Cisplatin results in increased expression of and results in increased cleavage of CASP9 protein	20674069
CASP9	Cisplatin	Cisplatin results in increased expression of CASP9 mRNA	24563380
CASP9	Cisplatin	Cisplatin results in increased expression of CASP9 protein	16803524
CASP9	Cisplatin	CXCL2 protein promotes the reaction [Cisplatin results in increased activity of CASP9 protein]	21271225
CASP9	Cisplatin	[Deoxyglucose co-treated with Cisplatin] results in increased activity of CASP9 protein	20138251
CASP9	Cisplatin	EGR1 protein promotes the reaction [Cisplatin results in increased activity of CASP9 protein]	21271225
CASP9	Cisplatin	[Fluorouracil co-treated with Cisplatin] results in increased activity of CASP9 protein	16803524
CASP9	Cisplatin	[Fluorouracil co-treated with Cisplatin] results in increased expression of CASP9 protein	16803524
CASP9	Cisplatin	[GJB1 protein co-treated with GJB2 protein] promotes the reaction [Cisplatin results in increased activity of CASP9 protein]	23747833
CASP9	Cisplatin	ING4 protein promotes the reaction [Cisplatin results in increased activity of CASP9 protein]	21052098
CASP9	Cisplatin	MIR630 mRNA inhibits the reaction [Cisplatin results in increased cleavage of CASP9 protein]	20145152
CASP9	Cisplatin	MYC protein promotes the reaction [Cisplatin results in increased cleavage of CASP9 protein]	21324178
CASP9	Cisplatin	Nicotine inhibits the reaction [[Cisplatin co-treated with Etoposide] results in increased activity of CASP9 protein]	18676776
CASP9	Cisplatin	Noscapine promotes the reaction [Cisplatin results in increased expression of and results in increased cleavage of CASP9 protein]	20674069
CASP9	Cisplatin	oleylamide inhibits the reaction [[GJB1 protein co-treated with GJB2 protein] promotes the reaction [Cisplatin results in increased activity of CASP9 protein]]	23747833
CASP9	Cisplatin	PRDX6 protein inhibits the reaction [Cisplatin results in increased activity of CASP9 protein]	21166495
CASP9	Cisplatin	[Sirolimus co-treated with Cisplatin] results in increased activity of CASP9 protein	20138251
CASP9	Cisplatin	Sirolimus promotes the reaction [Cisplatin results in increased cleavage of CASP9 protein]	18058806
CASP9	Cisplatin	SMG1 protein inhibits the reaction [Cisplatin results in increased activity of CASP9 protein]	21418860
CASP9	Cisplatin	[TNFSF10 protein co-treated with Cisplatin] results in increased activity of CASP9 protein	21252285
CASP9	Cisplatin	Tretinoin promotes the reaction [[GJB1 protein co-treated with GJB2 protein] promotes the reaction [Cisplatin results in increased activity of CASP9 protein]]	23747833
CASP9	Cisplatin	TYMP inhibits the reaction [Cisplatin results in increased activity of CASP9 protein]	14727531
CASP9	Cisplatin	TYMP protein inhibits the reaction [Cisplatin results in increased activity of CASP9 protein]	12565868
CASP9	Dichlorodiphenyl Dichloroethylene	Dichlorodiphenyl Dichloroethylene results in increased activity of CASP9 protein	19545618
CASP9	Diclofenac	Diclofenac inhibits the reaction [Thapsigargin results in increased activity of CASP9 protein]	16388830
CASP9	Diclofenac	Diclofenac inhibits the reaction [Tunicamycin results in increased activity of CASP9 protein]	16388830
CASP9	dideoxypetrosynol A	dideoxypetrosynol A results in increased activity of CASP9 protein	15547680
CASP9	Diethylhexyl Phthalate	Diethylhexyl Phthalate results in increased activity of CASP9 protein	22155658
CASP9	diethyl maleate	diethyl maleate results in increased expression of CASP9 mRNA	11875189
CASP9	Digitoxin	Digitoxin analog results in increased cleavage of CASP9 protein	22037315
CASP9	Digitoxin	Digitoxin results in increased cleavage of CASP9 protein	22037315
CASP9	dihydroceramide	dihydroceramide metabolite results in increased cleavage of CASP9 protein	17586710
CASP9	dihydrosanguinarine	dihydrosanguinarine results in increased activity of CASP9 protein	19346183
CASP9	Calcitriol	[Calcitriol co-treated with gemcitabine] results in increased expression of CASP9 protein	20699664
CASP9	dipropylenetriamine-NONOate	dipropylenetriamine-NONOate inhibits the reaction [chromium hexavalent ion results in increased activity of CASP9 protein]	19556603
CASP9	dipropylenetriamine-NONOate	dipropylenetriamine-NONOate inhibits the reaction [sodium bichromate results in increased activity of CASP9 protein]	19556603
CASP9	Ditiocarb	[[Ditiocarb binds to Copper] which affects the localization of CYCS protein] promotes the reaction [[[CYCS protein binds to APAF1 protein binds to CASP9 protein] which results in increased metabolism of and results in increased activity of CASP9 protein] which results in increased activity of CASP3 protein]	22951949
CASP9	DLBS 1425	DLBS 1425 results in increased activity of CASP9 protein	20703095
CASP9	DLBS 1425	DLBS 1425 results in increased cleavage of CASP9 protein	20703095
CASP9	DMU-212	DMU-212 results in increased activity of CASP9 protein	24055891
CASP9	docetaxel	benzoylcarbonyl-valyl-aspartyl-valyl-alanyl-aspartyl-fluoromethyl ketone inhibits the reaction [docetaxel results in increased cleavage of and results in increased activity of CASP9 protein]	17308071
CASP9	docetaxel	celecoxib promotes the reaction [docetaxel results in increased cleavage of and results in increased activity of CASP9 protein]	15688368
CASP9	docetaxel	docetaxel promotes the reaction [celecoxib results in increased cleavage of and results in increased activity of CASP9 protein]	15688368
CASP9	docetaxel	docetaxel results in increased cleavage of and results in increased activity of CASP9 protein	15688368|17308071
CASP9	Docosahexaenoic Acids	[Docosahexaenoic Acids co-treated with Fluorouracil] results in decreased expression of CASP9 mRNA	19015929
CASP9	donepezil	donepezil results in increased activity of CASP9 protein	20522977
CASP9	Doxorubicin	[2-(2-amino-3-methoxyphenyl)-4H-1-benzopyran-4-one results in decreased activity of MAP2K1 protein] inhibits the reaction [Doxorubicin results in increased cleavage of CASP9 protein]	18594523
CASP9	Doxorubicin	[2-(2-amino-3-methoxyphenyl)-4H-1-benzopyran-4-one results in decreased activity of MAP2K1 protein] inhibits the reaction [SOD2 protein affects the reaction [Doxorubicin results in increased cleavage of CASP9 protein]]	18594523
CASP9	Doxorubicin	2-(4-morpholinyl)-8-phenyl-4H-1-benzopyran-4-one promotes the reaction [Doxorubicin results in increased cleavage of CASP9 protein]	20856197
CASP9	Doxorubicin	7-monohydroxyethylrutoside inhibits the reaction [Doxorubicin results in increased cleavage of and results in increased activity of CASP9 protein]	17285121
CASP9	Doxorubicin	BCL2L11 protein promotes the reaction [[Doxorubicin co-treated with methylselenic acid] results in increased cleavage of and results in increased activity of CASP9 protein]	17339365
CASP9	Doxorubicin	BCL2L11 protein promotes the reaction [[Doxorubicin co-treated with Selenium] results in increased cleavage of and results in increased activity of CASP9 protein]	17339365
CASP9	Doxorubicin	BCL2 protein inhibits the reaction [2-(4-morpholinyl)-8-phenyl-4H-1-benzopyran-4-one promotes the reaction [Doxorubicin results in increased cleavage of CASP9 protein]]	20856197
CASP9	Doxorubicin	BCL2 protein inhibits the reaction [PI103 promotes the reaction [Doxorubicin results in increased cleavage of CASP9 protein]]	20856197
CASP9	Doxorubicin	[benzyloxycarbonyl-leucyl-glutamyl-histidyl-aspartic acid fluoromethyl ketone results in decreased activity of CASP9 protein] affects the reaction [SOD2 protein results in decreased susceptibility to Doxorubicin]	18594523
CASP9	Doxorubicin	[benzyloxycarbonyl-leucyl-glutamyl-histidyl-aspartic acid fluoromethyl ketone results in decreased activity of CASP9 protein] which results in decreased susceptibility to Doxorubicin	18594523
CASP9	Doxorubicin	CASP3 protein promotes the reaction [Doxorubicin results in increased cleavage of CASP9 protein]	17013758
CASP9	Doxorubicin	CASP9 protein mutant form inhibits the reaction [sildenafil results in increased activity of Doxorubicin]	20884855
CASP9	Doxorubicin	Doxorubicin affects the activity of CASP9 protein	15870702
CASP9	Doxorubicin	Doxorubicin affects the expression of CASP9 mRNA	16705698
CASP9	Doxorubicin	Doxorubicin analog results in increased activity of CASP9 protein	15981920
CASP9	Doxorubicin	[Doxorubicin co-treated with 2,5,7,8-tetramethyl-2R-(4R,8R,12-trimethyltridecyl)chroman-6-yloxy acetic acid] results in increased cleavage of CASP9 protein	21214929
CASP9	Doxorubicin	[Doxorubicin co-treated with FAS protein] results in increased activity of CASP9 protein	15958570
CASP9	Doxorubicin	[Doxorubicin co-treated with methylselenic acid] results in increased cleavage of and results in increased activity of CASP9 protein	17339365
CASP9	Doxorubicin	[Doxorubicin co-treated with Paclitaxel] results in increased activity of CASP9 protein	16168113
CASP9	Doxorubicin	[Doxorubicin co-treated with Selenium] results in increased cleavage of and results in increased activity of CASP9 protein	17339365
CASP9	Doxorubicin	Doxorubicin results in decreased expression of CASP9 mRNA	17404015
CASP9	Doxorubicin	Doxorubicin results in increased activity of CASP9 protein	11779855|15868924|15981920|17437844|18508926|20884855|22609468
CASP9	Doxorubicin	Doxorubicin results in increased cleavage of and results in increased activity of CASP9 protein	16024631|16364925|17285121|17651020
CASP9	Doxorubicin	Doxorubicin results in increased cleavage of CASP9 protein	15555623|15557793|16311509|17283156|17653088|17935137|18594523|20856197
CASP9	Doxorubicin	Doxorubicin results in increased expression of CASP9 mRNA	15576332|15939500|16001973
CASP9	Doxorubicin	Fluorouracil promotes the reaction [[Doxorubicin co-treated with Paclitaxel] results in increased activity of CASP9 protein]	16168113
CASP9	Doxorubicin	geldanamycin inhibits the reaction [Doxorubicin results in increased cleavage of CASP9 protein]	16311509
CASP9	Doxorubicin	[Indomethacin results in increased activity of CASP9 protein] which results in increased susceptibility to Doxorubicin	15812552
CASP9	Doxorubicin	LIG4 protein affects the reaction [Doxorubicin results in increased activity of CASP9 protein]	18508926
CASP9	Doxorubicin	MT3 protein inhibits the reaction [Doxorubicin results in increased activity of CASP9 protein]	19767621
CASP9	Doxorubicin	PI103 promotes the reaction [Doxorubicin results in increased cleavage of CASP9 protein]	20856197
CASP9	Doxorubicin	pluronic block copolymer p85 promotes the reaction [Doxorubicin results in increased expression of CASP9 mRNA]	15939500
CASP9	Doxorubicin	PRKDC protein affects the reaction [Doxorubicin results in increased activity of CASP9 protein]	18508926
CASP9	Doxorubicin	sildenafil promotes the reaction [Doxorubicin results in increased activity of CASP9 protein]	20884855
CASP9	Doxorubicin	SOD2 protein affects the reaction [Doxorubicin results in increased cleavage of CASP9 protein]	18594523
CASP9	Doxorubicin	TMSB4X protein inhibits the reaction [Doxorubicin results in increased cleavage of and results in increased activity of CASP9 protein]	16364925
CASP9	Doxorubicin	TNFRSF10A protein affects the reaction [Doxorubicin results in increased activity of CASP9 protein]	17437844
CASP9	Doxorubicin	TP53 protein promotes the reaction [2-(4-morpholinyl)-8-phenyl-4H-1-benzopyran-4-one promotes the reaction [Doxorubicin results in increased cleavage of CASP9 protein]]	20856197
CASP9	Doxorubicin	TP53 protein promotes the reaction [PI103 promotes the reaction [Doxorubicin results in increased cleavage of CASP9 protein]]	20856197
CASP9	Doxorubicin	wortmannin promotes the reaction [Doxorubicin results in increased cleavage of CASP9 protein]	17935137
CASP9	dracorhodin	dracorhodin analog results in increased activity of CASP9 protein	15215653
CASP9	Drugs, Chinese Herbal	Drugs, Chinese Herbal results in increased activity of CASP9 protein	15456542|15802533
CASP9	ebselen	ebselen inhibits the reaction [Mechlorethamine results in increased activity of CASP9 protein]	23649643
CASP9	echinocystic acid	echinocystic acid analog results in increased activity of CASP9 protein	15863893
CASP9	ellipticine	ellipticine results in increased activity of CASP9 protein	16027529
CASP9	ellipticine	ellipticine results in increased cleavage of and results in increased activity of CASP9 protein	21843585
CASP9	Environmental Pollutants	Environmental Pollutants results in increased expression of CASP9 mRNA	19118595
CASP9	Epirubicin	3',4',7-trihydroxyisoflavone promotes the reaction [Epirubicin results in increased expression of CASP9 mRNA]	22914566
CASP9	Epirubicin	Epirubicin promotes the reaction [3',4',7-trihydroxyisoflavone results in increased activity of CASP9 protein]	22914566
CASP9	Epirubicin	Epirubicin promotes the reaction [3',4',7-trihydroxyisoflavone results in increased expression of CASP9 mRNA]	22914566
CASP9	Epirubicin	Epirubicin promotes the reaction [formononetin results in increased activity of CASP9 protein]	23867903
CASP9	Epirubicin	Epirubicin promotes the reaction [formononetin results in increased expression of CASP9 mRNA]	23867903
CASP9	Epirubicin	Epirubicin results in increased activity of CASP9 protein	23867903
CASP9	Epirubicin	Epirubicin results in increased expression of CASP9 mRNA	22914566|23867903
CASP9	Epirubicin	formononetin promotes the reaction [Epirubicin results in increased activity of CASP9 protein]	23867903
CASP9	Epirubicin	formononetin promotes the reaction [Epirubicin results in increased expression of CASP9 mRNA]	23867903
CASP9	epigallocatechin gallate	epigallocatechin gallate analog results in increased cleavage of CASP9 protein	16115949
CASP9	epigallocatechin gallate	epigallocatechin gallate inhibits the reaction [Nitroprusside binds to and results in increased activity of CASP9 protein]	23665936
CASP9	epigallocatechin gallate	epigallocatechin gallate results in increased activity of CASP9 protein	15764647
CASP9	Equol	Equol results in increased cleavage of CASP9 protein	18973749
CASP9	erucylphospho-N,N,N-trimethylpropylammonium	erucylphospho-N,N,N-trimethylpropylammonium results in increased cleavage of and results in increased activity of CASP9 protein	20177898
CASP9	erythritol anhydride	benzyloxycarbonyl-leucyl-glutamyl-histidyl-aspartic acid fluoromethyl ketone inhibits the reaction [erythritol anhydride results in increased activity of CASP9 protein]	14998682
CASP9	erythritol anhydride	erythritol anhydride results in increased activity of CASP9 protein	14998682
CASP9	ethyl 2-amino-6-bromo-4-(1-cyano-2-ethoxy-2-oxoethyl)-4H-chromene-3-carboxylate	[alvocidib co-treated with ethyl 2-amino-6-bromo-4-(1-cyano-2-ethoxy-2-oxoethyl)-4H-chromene-3-carboxylate] results in increased cleavage of CASP9 protein	15634644
CASP9	Etodolac	Etodolac results in increased activity of CASP9 protein	16046235|16104877
CASP9	Etoposide	[CASP8 co-treated with TP53] affects the reaction [Etoposide results in increased cleavage of and results in increased activity of CASP9 protein]	21801448
CASP9	Etoposide	CASP8 mutant form inhibits the reaction [Etoposide results in increased cleavage of CASP9 protein]	21801448
CASP9	Etoposide	CASP9 mutant form inhibits the reaction [Etoposide results in increased cleavage of BID protein]	21801448
CASP9	Etoposide	[Cisplatin co-treated with Etoposide] results in increased activity of CASP9 protein	18676776
CASP9	Etoposide	Etoposide affects the expression of CASP9 protein	15215046
CASP9	Etoposide	Etoposide results in increased activity of CASP9 protein	18056177
CASP9	Etoposide	Etoposide results in increased cleavage of and results in increased activity of CASP9 protein	16364925|21745461|21801448
CASP9	Etoposide	Etoposide results in increased cleavage of CASP9 protein	12925536|17935137|21324178
CASP9	Etoposide	HTATIP2 protein promotes the reaction [Etoposide results in increased activity of CASP9 protein]	16799960
CASP9	Etoposide	MYC protein promotes the reaction [Etoposide results in increased cleavage of CASP9 protein]	21324178
CASP9	Etoposide	Nicotine inhibits the reaction [[Cisplatin co-treated with Etoposide] results in increased activity of CASP9 protein]	18676776
CASP9	Etoposide	nimesulide inhibits the reaction [Etoposide results in increased cleavage of and results in increased activity of CASP9 protein]	21745461
CASP9	Etoposide	TMSB4X protein inhibits the reaction [Etoposide results in increased cleavage of and results in increased activity of CASP9 protein]	16364925
CASP9	Etoposide	wortmannin promotes the reaction [Etoposide results in increased cleavage of CASP9 protein]	17935137
CASP9	EUK-134	EUK-134 inhibits the reaction [Capsaicin results in increased cleavage of CASP9 protein]	21647434
CASP9	fipronil	fipronil results in increased activity of CASP9 protein	22421270
CASP9	fisetin	[Cisplatin co-treated with fisetin] promotes the reaction [CASP9 protein results in increased cleavage of CASP7 protein]	21216935
CASP9	fisetin	[Cisplatin co-treated with fisetin] results in increased cleavage of and results in increased activity of CASP9 protein	21216935
CASP9	fisetin	fisetin promotes the reaction [CASP9 protein results in increased cleavage of CASP7 protein]	21216935
CASP9	fisetin	fisetin results in increased cleavage of and results in increased activity of CASP9 protein	21216935
CASP9	flavanone	flavanone results in increased cleavage of and results in increased activity of CASP9 protein	22056764
CASP9	Flavones	Flavones analog results in increased activity of CASP9 protein	20674374
CASP9	Flavonoids	Flavonoids results in increased activity of CASP9 protein	24036141
CASP9	FLLL 32	FLLL 32 results in increased activity of CASP9 protein	20576164
CASP9	fludarabine	[2-(4-morpholinyl)-8-phenyl-4H-1-benzopyran-4-one co-treated with fludarabine] results in increased cleavage of CASP9 protein	15850772
CASP9	fludarabine	BCL2 affects the reaction [fludarabine results in increased cleavage of and results in increased activity of CASP9 protein]	15516989
CASP9	fludarabine	[clofarabine co-treated with fludarabine co-treated with Busulfan] results in increased cleavage of CASP9 protein	20933509
CASP9	fludarabine	fludarabine results in increased cleavage of and results in increased activity of CASP9 protein	15516989
CASP9	fludarabine	[LAQ824 co-treated with fludarabine] results in increased activity of CASP9 protein	18852132
CASP9	Fluorouracil	CASP8 affects the reaction [Fluorouracil promotes the reaction [andrographolide results in increased activity of CASP9 protein]]	19097688
CASP9	Fluorouracil	[Docosahexaenoic Acids co-treated with Fluorouracil] results in decreased expression of CASP9 mRNA	19015929
CASP9	Fluorouracil	FAS protein affects the reaction [Fluorouracil results in increased activity of CASP9 protein]	17056233
CASP9	Fluorouracil	[Fluorouracil co-treated with aloe emodin] affects the expression of CASP9	19928967
CASP9	Fluorouracil	[Fluorouracil co-treated with Cisplatin] results in increased activity of CASP9 protein	16803524
CASP9	Fluorouracil	[Fluorouracil co-treated with Cisplatin] results in increased expression of CASP9 protein	16803524
CASP9	Fluorouracil	Fluorouracil promotes the reaction [aloe emodin results in increased expression of CASP9 protein modified form]	19928967
CASP9	Fluorouracil	Fluorouracil promotes the reaction [andrographolide results in increased activity of CASP9 protein]	19097688
CASP9	Fluorouracil	Fluorouracil promotes the reaction [arsenic trioxide results in decreased expression of CASP9 protein]	22963400
CASP9	Fluorouracil	Fluorouracil promotes the reaction [[Doxorubicin co-treated with Paclitaxel] results in increased activity of CASP9 protein]	16168113
CASP9	Fluorouracil	Fluorouracil results in increased activity of CASP9 protein	10779637|12414664|15996812|16407826|16803524|17056233|18830594
CASP9	Fluorouracil	Fluorouracil results in increased cleavage of and results in increased activity of CASP9 protein	15546879
CASP9	Fluorouracil	Fluorouracil results in increased cleavage of CASP9 protein	17498489|19816940
CASP9	Fluorouracil	Fluorouracil results in increased expression of CASP9 protein	16803524
CASP9	Fluorouracil	IFNA1 protein promotes the reaction [Fluorouracil results in increased activity of CASP9 protein]	17016659
CASP9	Fluorouracil	N(1),N(11)-diethylnorspermine promotes the reaction [Fluorouracil results in increased cleavage of and results in increased activity of CASP9 protein]	15546879
CASP9	Fluorouracil	PTGS2 protein inhibits the reaction [Fluorouracil results in increased activity of CASP9 protein]	12414664
CASP9	Fluorouracil	RNF34 protein inhibits the reaction [Fluorouracil results in increased activity of CASP9 protein]	16407826
CASP9	Fluorouracil	TP53 protein inhibits the reaction [Fluorouracil results in increased cleavage of and results in increased activity of CASP9 protein]	15546879
CASP9	Fluorouracil	TP53 protein inhibits the reaction [N(1),N(11)-diethylnorspermine promotes the reaction [Fluorouracil results in increased cleavage of and results in increased activity of CASP9 protein]]	15546879
CASP9	Formaldehyde	Formaldehyde results in increased activity of CASP9 protein	20347000
CASP9	Formaldehyde	PRDX2 protein inhibits the reaction [Formaldehyde results in increased activity of CASP9 protein]	20347000
CASP9	formononetin	Acetylcysteine inhibits the reaction [formononetin results in increased expression of CASP9 mRNA]	23867903
CASP9	formononetin	Epirubicin promotes the reaction [formononetin results in increased activity of CASP9 protein]	23867903
CASP9	formononetin	Epirubicin promotes the reaction [formononetin results in increased expression of CASP9 mRNA]	23867903
CASP9	formononetin	formononetin promotes the reaction [Epirubicin results in increased activity of CASP9 protein]	23867903
CASP9	formononetin	formononetin promotes the reaction [Epirubicin results in increased expression of CASP9 mRNA]	23867903
CASP9	formononetin	formononetin results in increased activity of CASP9 protein	23867903
CASP9	formononetin	formononetin results in increased expression of CASP9 mRNA	23867903
CASP9	N-Formylmethionine Leucyl-Phenylalanine	Melatonin inhibits the reaction [N-Formylmethionine Leucyl-Phenylalanine results in increased activity of CASP9 protein]	20130848
CASP9	N-Formylmethionine Leucyl-Phenylalanine	N-Formylmethionine Leucyl-Phenylalanine results in increased activity of CASP9 protein	20130848
CASP9	fraxetin	fraxetin results in decreased activity of CASP9 protein	15996779
CASP9	gambogic acid	benzyloxycarbonyl-valyl-alanyl-aspartic acid analog inhibits the reaction [[gambogic acid co-treated with bortezomib] results in increased activity of CASP9 protein]	24291039
CASP9	gambogic acid	[gambogic acid co-treated with bortezomib] results in increased activity of CASP9 protein	24291039
CASP9	gambogic acid	gambogic acid results in decreased expression of CASP9 protein alternative form	19464570
CASP9	gamma-sitosterol	gamma-sitosterol results in increased activity of CASP9 protein	14612938
CASP9	gamma-Tocopherol	gamma-Tocopherol results in increased activity of CASP9 protein	15596715
CASP9	garcinol	garcinol results in increased cleavage of CASP9 protein	16052481
CASP9	gedunin	gedunin results in increased activity of CASP9 protein	21381696
CASP9	geldanamycin	geldanamycin inhibits the reaction [Doxorubicin results in increased cleavage of CASP9 protein]	16311509
CASP9	gemcitabine	[Calcitriol co-treated with gemcitabine] results in increased expression of CASP9 protein	20699664
CASP9	gemcitabine	gemcitabine results in increased activity of CASP9 protein	12479703|15476743|17159604
CASP9	gemcitabine	gemcitabine results in increased cleavage of CASP9 protein	15726400
CASP9	gemcitabine	SMG1 protein inhibits the reaction [gemcitabine results in increased activity of CASP9 protein]	21418860
CASP9	Genistein	[Genistein co-treated with TNFSF10 protein] results in increased activity of CASP9 protein	19497411
CASP9	Genistein	Genistein inhibits the reaction [benzo(e)pyrene results in increased activity of CASP9 protein]	19959636
CASP9	Genistein	Genistein promotes the reaction [arsenic trioxide results in increased activity of CASP9 protein]	20219070
CASP9	Genistein	Genistein results in increased activity of CASP9 protein	20219070
CASP9	gingerol	gingerol inhibits the reaction [Testosterone results in decreased expression of CASP9 protein]	18030663
CASP9	gingerol	gingerol results in increased expression of CASP9 mRNA	19481070
CASP9	gingerol	gingerol results in increased expression of CASP9 protein	18030663|19481070
CASP9	glaucocalyxin A	glaucocalyxin A results in increased activity of CASP9 protein	20851175
CASP9	Glucose	[Glucose deficiency co-treated with Acetylcysteine] results in increased activity of CASP9 protein	17309078
CASP9	Glucose	[Glucose deficiency co-treated with CAT] results in increased activity of CASP9 protein	17309078
CASP9	Glucose	[Glucose deficiency co-treated with Tetradecanoylphorbol Acetate] results in increased activity of CASP9 protein	17309078
CASP9	Glutathione	Glutathione affects the reaction [SOD2 protein affects the activity of CASP9 protein]	18594523
CASP9	Glutathione	Glutathione inhibits the reaction [Thimerosal results in increased activity of CASP9 protein]	12140745
CASP9	Glycochenodeoxycholic Acid	Glycochenodeoxycholic Acid results in increased activity of CASP9 protein	16322111
CASP9	Glycochenodeoxycholic Acid	Sulfasalazine inhibits the reaction [Glycochenodeoxycholic Acid results in increased activity of CASP9 protein]	16322111
CASP9	Gold Compounds	Gold Compounds results in increased activity of CASP9 protein	20209498
CASP9	goniothalamin	goniothalamin results in increased activity of CASP9 protein	20498002
CASP9	goniothalamin	goniothalamin results in increased cleavage of CASP9 protein	21810437
CASP9	Gossypol	Gossypol results in increased cleavage of CASP9 protein	18840529
CASP9	grifolin	grifolin results in increased activity of CASP9 protein	15949805
CASP9	Griseofulvin	Griseofulvin results in increased activity of CASP9 protein	23329179
CASP9	HCV 796	HCV 796 results in increased activity of CASP9 protein	19098685
CASP9	heminordihydroguaiaretic acid	heminordihydroguaiaretic acid results in increased activity of CASP9 protein	17393435
CASP9	Heterocyclic Compounds, 3-Ring	Heterocyclic Compounds, 3-Ring results in increased activity of CASP9 protein	21500194
CASP9	honokiol	honokiol results in increased activity of CASP9 protein	15802533
CASP9	Fenretinide	2-(2-amino-3-methoxyphenyl)-4H-1-benzopyran-4-one inhibits the reaction [Fenretinide results in increased cleavage of CASP9 protein]	16407847
CASP9	Fenretinide	[Fenretinide co-treated with TNFSF10 protein] results in increased activity of CASP9 protein	17273769
CASP9	Fenretinide	PD 169316 inhibits the reaction [Fenretinide results in increased cleavage of CASP9 protein]	16407847
CASP9	HS 1200	HS 1200 results in increased cleavage of CASP9 protein	18565645
CASP9	Hydrazones	Hydrazones results in increased cleavage of and results in increased activity of CASP9 protein	22056764
CASP9	Hydrochloric Acid	Hydrochloric Acid results in decreased expression of CASP9 mRNA	15046208
CASP9	Hydrogen Peroxide	Aspirin inhibits the reaction [Hydrogen Peroxide results in increased activity of CASP9 protein]	14753751
CASP9	Hydrogen Peroxide	Hydrogen Peroxide affects the expression of CASP9 protein	21179406
CASP9	Hydrogen Peroxide	Hydrogen Peroxide results in increased activity of CASP9 protein	14753751|21431366
CASP9	Hydrogen Peroxide	Melatonin promotes the reaction [Hydrogen Peroxide results in increased activity of CASP9 protein]	21431366
CASP9	hydroperoxyisophosphamide	BAX promotes the reaction [hydroperoxyisophosphamide results in increased activity of CASP9 protein]	11723234
CASP9	hydroperoxyisophosphamide	BCL2 inhibits the reaction [hydroperoxyisophosphamide results in increased activity of CASP9 protein]	11723234
CASP9	hydroquinone	hydroquinone results in decreased expression of CASP9 mRNA	15452088
CASP9	hydroquinone	hydroquinone results in increased activity of CASP9 protein	15816534|20946948
CASP9	hydroquinone	hydroquinone results in increased cleavage of CASP9 protein	15777082|22302391
CASP9	3-Hydroxybutyric Acid	3-Hydroxybutyric Acid inhibits the reaction [Rotenone results in increased activity of CASP9 protein]	16917840
CASP9	hyperforin dicyclohexylammonium	hyperforin dicyclohexylammonium results in increased cleavage of CASP9 protein	21376709
CASP9	Ifosfamide	BCL2 protein inhibits the reaction [Ifosfamide results in increased activity of CASP9 protein]	11723234
CASP9	indioside D	indioside D results in increased cleavage of CASP9 protein	18376857
CASP9	Indocyanine Green	Indocyanine Green results in increased expression of CASP9 mRNA	23675521
CASP9	Indocyanine Green	Indocyanine Green results in increased expression of CASP9 protein	23675521
CASP9	indole-3-carbinol	indole-3-carbinol results in increased activity of CASP9 protein	16082211
CASP9	indole-3-carbinol	indole-3-carbinol results in increased cleavage of and results in increased activity of CASP9 protein	20335513
CASP9	Indomethacin	2-(4-morpholinyl)-8-phenyl-4H-1-benzopyran-4-one affects the reaction [Indomethacin results in increased activity of CASP9 protein]	17341418
CASP9	Indomethacin	6-hydroxy-2,5,7,8-tetramethylchroman-2-carboxylic acid inhibits the reaction [Indomethacin results in increased activity of CASP9 protein]	17341418
CASP9	Indomethacin	Anisomycin promotes the reaction [Indomethacin results in increased activity of CASP9 protein]	17341418
CASP9	Indomethacin	anthra(1,9-cd)pyrazol-6(2H)-one inhibits the reaction [Indomethacin results in increased activity of CASP9 protein]	17341418
CASP9	Indomethacin	Indomethacin results in increased activity of CASP9 protein	11005569|15812552|17341418
CASP9	Indomethacin	[Indomethacin results in increased activity of CASP9 protein] which results in increased susceptibility to Doxorubicin	15812552
CASP9	Indomethacin	Indomethacin results in increased cleavage of and results in increased activity of CASP9 protein	15804060
CASP9	Indomethacin	SB 203580 inhibits the reaction [Indomethacin results in increased activity of CASP9 protein]	17341418
CASP9	Indomethacin	U 0126 inhibits the reaction [Indomethacin results in increased activity of CASP9 protein]	17341418
CASP9	ircinin-1	ircinin-1 results in increased cleavage of and results in increased activity of CASP9 protein	16163705
CASP9	irinotecan	benzoylcarbonyl-aspartyl-glutamyl-valyl-aspartyl-fluoromethyl ketone inhibits the reaction [irinotecan results in increased activity of CASP9 protein]	22898888
CASP9	irinotecan	benzyloxycarbonyl-leucyl-glutamyl-histidyl-aspartic acid fluoromethyl ketone inhibits the reaction [irinotecan results in increased activity of CASP9 protein]	22898888
CASP9	irinotecan	irinotecan promotes the reaction [AS602868 results in increased cleavage of and results in increased activity of CASP9 protein]	18182997
CASP9	irinotecan	irinotecan results in increased activity of CASP9 protein	22898888
CASP9	irinotecan	irinotecan results in increased cleavage of and results in increased activity of CASP9 protein	18182997
CASP9	iroxanadine	iroxanadine inhibits the reaction [Oxygen deficiency results in increased activity of CASP9 protein]	15583868
CASP9	iroxanadine	Quercetin inhibits the reaction [iroxanadine inhibits the reaction [Oxygen deficiency results in increased activity of CASP9 protein]]	15583868
CASP9	Isatin	[Copper binds to Isatin binds to 2-(2-aminoethyl)pyridine] which results in increased cleavage of CASP9 protein	17327230
CASP9	Isatin	[Copper binds to Isatin binds to trimethylenediamine] which results in increased cleavage of CASP9 protein	17327230
CASP9	isoangustone A	isoangustone A results in increased cleavage of CASP9 protein	20229524
CASP9	isocoumarin NM-3	isocoumarin NM-3 promotes the reaction [Dexamethasone results in increased activity of CASP9 protein]	15574755
CASP9	isoliquiritigenin	isoliquiritigenin results in increased cleavage of and results in increased activity of CASP9 protein	23747687
CASP9	JAI-51	JAI-51 results in increased activity of CASP9 protein	24134853
CASP9	JP8 aviation fuel	JP8 aviation fuel results in increased expression of CASP9 mRNA	12832151
CASP9	kaempferol	kaempferol results in increased cleavage of CASP9 protein	18331776
CASP9	Ketamine	Ketamine results in increased activity of CASP9 protein	19001360
CASP9	KNK 437	KNK 437 promotes the reaction [arsenic trioxide results in increased cleavage of CASP9 protein]	19371599
CASP9	kolaviron	kolaviron inhibits the reaction [Atrazine results in increased expression of CASP9 mRNA]	21333729
CASP9	kolaviron	kolaviron results in increased expression of CASP9 mRNA	21333729
CASP9	labedipinedilol A	labedipinedilol A results in increased activity of CASP9 protein	19056458
CASP9	LAQ824	[LAQ824 co-treated with fludarabine] results in increased activity of CASP9 protein	18852132
CASP9	Leuprolide	Leuprolide results in increased expression of CASP9 protein	15965100
CASP9	Lidocaine	Lidocaine results in decreased expression of CASP9 protein	20194319
CASP9	Lipopolysaccharides	Acetylcysteine inhibits the reaction [Lipopolysaccharides results in increased activity of CASP9 protein]	20848084
CASP9	Lipopolysaccharides	Lipopolysaccharides results in increased activity of CASP9 protein	20848084
CASP9	Lipopolysaccharides	Lipopolysaccharides results in increased expression of CASP9 protein	21844306
CASP9	Lithocholic Acid	benzyloxycarbonyl-valyl-alanyl-aspartic acid analog inhibits the reaction [Lithocholic Acid results in increased cleavage of and results in increased activity of CASP9 protein]	19054763
CASP9	Lithocholic Acid	[[[[Lithocholic Acid results in increased abundance of Reactive Oxygen Species] which results in increased localization of and results in increased activity of FAS protein] which results in increased activity of CASP8 protein] which results in increased cleavage of BID protein] which results in increased activity of CASP9 protein	19054763
CASP9	Lithocholic Acid	[[[[[Lithocholic Acid results in increased abundance of Reactive Oxygen Species] which results in increased localization of and results in increased activity of FAS protein] which results in increased activity of CASP8 protein] which results in increased cleavage of BID protein] which results in increased activity of CASP9 protein] which results in increased activity of CASP3 protein	19054763
CASP9	Lithocholic Acid	Lithocholic Acid results in increased cleavage of and results in increased activity of CASP9 protein	19054763
CASP9	lonafarnib	[lonafarnib co-treated with bortezomib] results in increased cleavage of CASP9 protein	16118318
CASP9	lonafarnib	lonafarnib results in increased cleavage of CASP9 protein	16118318
CASP9	lonidamine	arsenic trioxide promotes the reaction [lonidamine results in increased cleavage of and results in increased activity of CASP9 protein]	21889928
CASP9	lonidamine	BCL2 protein inhibits the reaction [arsenic trioxide promotes the reaction [lonidamine results in increased cleavage of and results in increased activity of CASP9 protein]]	21889928
CASP9	lonidamine	BCL2 protein inhibits the reaction [lonidamine promotes the reaction [arsenic trioxide results in increased cleavage of and results in increased activity of CASP9 protein]]	21889928
CASP9	lonidamine	[Curcumin co-treated with lonidamine] results in increased cleavage of CASP9 protein	20605902
CASP9	lonidamine	lonidamine promotes the reaction [arsenic trioxide results in increased cleavage of and results in increased activity of CASP9 protein]	21889928
CASP9	lonidamine	lonidamine results in increased cleavage of and results in increased activity of CASP9 protein	21889928
CASP9	Loratadine	Loratadine results in increased cleavage of CASP9 protein	20570632
CASP9	Lovastatin	Lovastatin results in increased activity of CASP9 protein	12933658|15705602
CASP9	Luteolin	Luteolin results in increased activity of CASP9 protein	21601631
CASP9	Luteolin	Luteolin results in increased cleavage of CASP9 protein	18331776|19397994
CASP9	mafosfamide	BAX protein promotes the reaction [mafosfamide results in increased activity of CASP9 protein]	11723234
CASP9	mancozeb	mancozeb results in increased activity of CASP9 protein	22824503
CASP9	mancozeb	mancozeb results in increased cleavage of and results in increased activity of CASP9 protein	22289270
CASP9	Maneb	Maneb results in increased activity of CASP9 protein	22824503
CASP9	manganese(III)-tetrakis(4-benzoic acid)porphyrin	manganese(III)-tetrakis(4-benzoic acid)porphyrin inhibits the reaction [melamine results in increased cleavage of CASP9 protein]	22915474
CASP9	manganese(III)-tetrakis(4-benzoic acid)porphyrin	manganese(III)-tetrakis(4-benzoic acid)porphyrin inhibits the reaction [sodium bichromate results in increased activity of CASP9 protein]	18544562
CASP9	manganese(III)-tetrakis(4-benzoic acid)porphyrin	manganese(III)-tetrakis(4-benzoic acid)porphyrin inhibits the reaction [[XCT790 results in increased abundance of Reactive Oxygen Species] which results in increased activity of CASP9 protein]	19464277
CASP9	Mannitol	Mannitol results in increased activity of CASP9 protein	12011046
CASP9	Masoprocol	Masoprocol results in increased activity of CASP9 protein	15034932
CASP9	Mechlorethamine	ebselen inhibits the reaction [Mechlorethamine results in increased activity of CASP9 protein]	23649643
CASP9	Mechlorethamine	Mechlorethamine results in increased activity of CASP9 protein	16738803|23649643
CASP9	Mechlorethamine	Mechlorethamine results in increased cleavage of and results in increased activity of CASP9 protein	22285227
CASP9	melamine	1,2-Dihydroxybenzene-3,5-Disulfonic Acid Disodium Salt inhibits the reaction [melamine results in increased cleavage of CASP9 protein]	22915474
CASP9	melamine	manganese(III)-tetrakis(4-benzoic acid)porphyrin inhibits the reaction [melamine results in increased cleavage of CASP9 protein]	22915474
CASP9	melamine	melamine results in increased cleavage of CASP9 protein	22915474
CASP9	melamine	TGFB1 protein affects the reaction [melamine results in increased cleavage of CASP9 protein]	22915474
CASP9	Melatonin	Melatonin inhibits the reaction [N-Formylmethionine Leucyl-Phenylalanine results in increased activity of CASP9 protein]	20130848
CASP9	Melatonin	Melatonin inhibits the reaction [Thapsigargin results in increased activity of CASP9 protein]	20130848
CASP9	Melatonin	Melatonin promotes the reaction [Hydrogen Peroxide results in increased activity of CASP9 protein]	21431366
CASP9	Melatonin	Melatonin results in increased activity of CASP9 protein	19012662|19552762
CASP9	Melitten	Melitten results in increased cleavage of and results in increased activity of CASP9 protein	21456063
CASP9	Melphalan	Melphalan results in increased cleavage of and results in increased activity of CASP9 protein	22285227
CASP9	Methoxsalen	Methoxsalen results in decreased expression of CASP9 protein	22796345
CASP9	methyl 5-chloro-4,5-didehydrojasmonate	2-(2-amino-3-methoxyphenyl)-4H-1-benzopyran-4-one promotes the reaction [methyl 5-chloro-4,5-didehydrojasmonate results in increased activity of CASP9 protein]	20696234
CASP9	methyl 5-chloro-4,5-didehydrojasmonate	methyl 5-chloro-4,5-didehydrojasmonate results in increased activity of and results in increased cleavage of CASP9 protein	20696234
CASP9	methyl antcinate A	[benzyloxycarbonyl-leucyl-glutamyl-histidyl-aspartic acid fluoromethyl ketone results in decreased activity of CASP9 protein] which results in decreased susceptibility to methyl antcinate A	20557081
CASP9	methyl antcinate A	methyl antcinate A results in increased activity of CASP9 protein	20557081
CASP9	Methylnitronitrosoguanidine	Methylnitronitrosoguanidine results in increased activity of CASP9 protein	15589979
CASP9	methylselenic acid	BCL2L11 protein promotes the reaction [[Doxorubicin co-treated with methylselenic acid] results in increased cleavage of and results in increased activity of CASP9 protein]	17339365
CASP9	methylselenic acid	[Doxorubicin co-treated with methylselenic acid] results in increased cleavage of and results in increased activity of CASP9 protein	17339365
CASP9	methylselenic acid	[methylselenic acid co-treated with Tamoxifen] results in increased cleavage of CASP9 protein	18790785
CASP9	methylselenic acid	[[methylselenic acid co-treated with Tamoxifen] results in increased cleavage of CASP9 protein] which results in increased cleavage of CASP8 protein	18790785
CASP9	methylselenic acid	methylselenic acid results in increased cleavage of CASP9 protein	18790785
CASP9	methylselenic acid	[methylselenic acid results in increased cleavage of CASP9 protein] which results in increased cleavage of CASP8 protein	18790785
CASP9	methylselenic acid	methylselenic acid results in increased expression of CASP9 mRNA	12517777
CASP9	Metoprolol	Metoprolol results in increased cleavage of CASP9 protein	19106745
CASP9	Mevalonic Acid	Mevalonic Acid inhibits the reaction [Simvastatin results in increased cleavage of CASP9 protein]	20045437
CASP9	Mimosine	Mimosine results in increased cleavage of and results in increased activity of CASP9 protein	18058236
CASP9	Mitomycin	Mitomycin promotes the reaction [CASP9 protein results in increased secretion of CYCS protein]	10960761
CASP9	Mitomycin	Mitomycin results in increased activity of CASP9 protein	16186332|17094455|17530733
CASP9	Mitomycin	Mitomycin results in increased cleavage of and results in increased activity of CASP9 protein	12181741
CASP9	Mitoxantrone	Mitoxantrone results in increased activity of CASP9 protein	12948851
CASP9	Morphine	Morphine results in increased activity of CASP9 protein	19292871
CASP9	MT19c compound	MT19c compound results in increased cleavage of and results in increased activity of CASP9 protein	21803404
CASP9	Mustard Gas	benzoylcarbonyl-aspartyl-glutamyl-valyl-aspartyl-fluoromethyl ketone inhibits the reaction [Mustard Gas results in increased activity of CASP9 protein]	20226831
CASP9	Mustard Gas	benzyloxycarbonyl-isoleucyl-glutamyl-threonyl-aspartic acid fluoromethyl ketone inhibits the reaction [Mustard Gas results in increased activity of CASP9 protein]	20226831
CASP9	Mustard Gas	BRCA2 protein inhibits the reaction [Mustard Gas results in increased cleavage of CASP9 protein]	20435105
CASP9	Mustard Gas	CALM1 protein promotes the reaction [Mustard Gas results in increased cleavage of and results in increased activity of CASP9 protein]	16935404
CASP9	Mustard Gas	Mustard Gas results in increased activity of CASP9 protein	12482751|16738803|20226831
CASP9	Mustard Gas	Mustard Gas results in increased cleavage of and results in increased activity of CASP9 protein	16935404|18161513
CASP9	Mustard Gas	Mustard Gas results in increased cleavage of CASP9 protein	20435105
CASP9	myricetin	myricetin results in increased activity of CASP9 protein	15748703
CASP9	N(1),N(11)-diethylnorspermine	N(1),N(11)-diethylnorspermine promotes the reaction [Fluorouracil results in increased cleavage of and results in increased activity of CASP9 protein]	15546879
CASP9	N(1),N(11)-diethylnorspermine	TP53 protein inhibits the reaction [N(1),N(11)-diethylnorspermine promotes the reaction [Fluorouracil results in increased cleavage of and results in increased activity of CASP9 protein]]	15546879
CASP9	N(2)-(2-aminocyclohexyl)-N(6)-(3-chlorophenyl)-9-ethyl-9H-purine-2,6-diamine	N(2)-(2-aminocyclohexyl)-N(6)-(3-chlorophenyl)-9-ethyl-9H-purine-2,6-diamine results in increased activity of CASP9 protein	16140939
CASP9	N-(2-cyclohexyloxy-4-nitrophenyl)methanesulfonamide	N-(2-cyclohexyloxy-4-nitrophenyl)methanesulfonamide results in increased activity of CASP9 protein	12414664
CASP9	N-(2-cyclohexyloxy-4-nitrophenyl)methanesulfonamide	PTGS2 protein inhibits the reaction [N-(2-cyclohexyloxy-4-nitrophenyl)methanesulfonamide results in increased activity of CASP9 protein]	12414664
CASP9	N-(4-methoxybenzyl)-N'-(5-nitro-1,3-thiazol-2-yl)urea	[N-(4-methoxybenzyl)-N'-(5-nitro-1,3-thiazol-2-yl)urea results in decreased activity of GSK3B protein] results in increased susceptibility to [troglitazone results in increased expression of CASP9 protein]	20540935
CASP9	naphthalene	[naphthalene binds to pyrrolo(2,1-c)(1,4)benzodiazepine] which results in increased expression of CASP9 protein	21732540
CASP9	naphtho(1,2-b)furan-4,5-dione	naphtho(1,2-b)furan-4,5-dione results in increased activity of CASP9 protein	19747539|20197088
CASP9	naringenin	naringenin results in increased activity of CASP9 protein	19124070
CASP9	naringin	naringin results in increased expression of CASP9 mRNA	22847135
CASP9	navitoclax	navitoclax results in increased cleavage of CASP9 protein	21562047
CASP9	NCQ 344	benzyloxycarbonyl-valyl-alanyl-aspartic acid analog inhibits the reaction [NCQ 344 results in increased activity of CASP9 protein]	10996300
CASP9	NCQ 344	NCQ 344 results in increased activity of CASP9 protein	10996300
CASP9	NCQ 436	benzyloxycarbonyl-valyl-alanyl-aspartic acid analog inhibits the reaction [NCQ 436 results in increased activity of CASP9 protein]	10996300
CASP9	NCQ 436	NCQ 436 results in increased activity of CASP9 protein	10996300
CASP9	NCX 4040	NCX 4040 results in increased cleavage of and results in increased activity of CASP9 protein	16282376
CASP9	NCX 4040	NCX 4040 results in increased expression of CASP9 mRNA	20188076
CASP9	neem oil	CASP9 protein affects the reaction [neem oil results in increased cleavage of and results in increased activity of CASP3 protein]	22915764
CASP9	neem oil	neem oil results in increased cleavage of and results in increased activity of CASP9 protein	22915764
CASP9	neoxanthin	neoxanthin results in increased cleavage of and results in increased activity of CASP9 protein	17186379
CASP9	N-ethoxymethyl-3-amino-1,2,4-benzotriazine-1,4-dioxide	N-ethoxymethyl-3-amino-1,2,4-benzotriazine-1,4-dioxide results in increased cleavage of and results in increased activity of CASP9 protein	20530905
CASP9	Nickel	[Quercetin analog co-treated with Nickel] results in increased activity of CASP9 protein	20577783
CASP9	nickel acetate	nickel acetate results in increased activity of CASP9 protein	22245127
CASP9	nickel chloride	nickel chloride results in increased activity of CASP9 protein	23566959
CASP9	nickel chloride	pifithrin inhibits the reaction [nickel chloride results in increased activity of CASP9 protein]	23566959
CASP9	nickel chloride	TP53 mutant form inhibits the reaction [nickel chloride results in increased activity of CASP9 protein]	23566959
CASP9	nickel chloride	[TP53 mutant form inhibits the reaction [nickel chloride results in increased activity of CASP9 protein]] which results in decreased cleavage of CASP3 protein	23566959
CASP9	nickel ferrite	nickel ferrite results in increased activity of CASP9 protein	21382431
CASP9	nickel ferrite	nickel ferrite results in increased expression of CASP9 mRNA	21382431
CASP9	Nicotine	Nicotine inhibits the reaction [[Cisplatin co-treated with Etoposide] results in increased activity of CASP9 protein]	18676776
CASP9	Nicotine	Nicotine results in decreased expression of CASP9 mRNA	16949557
CASP9	Niflumic Acid	benzyloxycarbonyl-isoleucyl-glutamyl-threonyl-aspartic acid fluoromethyl ketone inhibits the reaction [[Niflumic Acid co-treated with ciglitazone] results in increased cleavage of CASP9 protein]	21067863
CASP9	Niflumic Acid	DDIT3 mutant form inhibits the reaction [[Niflumic Acid co-treated with ciglitazone] results in increased cleavage of CASP9 protein]	21067863
CASP9	Niflumic Acid	[Niflumic Acid co-treated with ciglitazone] results in increased cleavage of CASP9 protein	21067863
CASP9	nimbolide	nimbolide results in increased expression of CASP9 mRNA	20429769
CASP9	nimbolide	nimbolide results in increased expression of CASP9 protein	20429769
CASP9	nimesulide	benzyloxycarbonyl-isoleucyl-glutamyl-threonyl-aspartic acid fluoromethyl ketone inhibits the reaction [nimesulide results in increased cleavage of and results in increased activity of CASP9 protein]	19360361
CASP9	nimesulide	nimesulide inhibits the reaction [Etoposide results in increased cleavage of and results in increased activity of CASP9 protein]	21745461
CASP9	nimesulide	nimesulide results in increased cleavage of and results in increased activity of CASP9 protein	19360361
CASP9	Nitric Oxide	Nitric Oxide results in increased activity of CASP9 protein	15126337
CASP9	Nitrogen Oxides	Nitrogen Oxides inhibits the reaction [Benzo(a)pyrene results in increased cleavage of CASP9 protein]	16041517
CASP9	Nitroprusside	epigallocatechin gallate inhibits the reaction [Nitroprusside binds to and results in increased activity of CASP9 protein]	23665936
CASP9	Nitroprusside	Nitroprusside binds to and results in increased activity of CASP9 protein	23665936
CASP9	Nitroprusside	Nitroprusside results in decreased activity of CASP9 protein	22543296
CASP9	Nitroprusside	Nitroprusside results in increased activity of CASP9 protein	22178905
CASP9	Nitroprusside	Ursodeoxycholic Acid inhibits the reaction [Nitroprusside results in increased activity of CASP9 protein]	22178905
CASP9	N,N-dimethylphytosphingosine	N,N-dimethylphytosphingosine results in increased activity of CASP9 protein	19481559
CASP9	N,N,N',N'-tetrakis(2-pyridylmethyl)ethylenediamine	N,N,N',N'-tetrakis(2-pyridylmethyl)ethylenediamine results in increased activity of CASP9 protein	17169355
CASP9	norcantharidin	norcantharidin results in increased activity of CASP9 protein	20040369|21266192
CASP9	Noscapine	Noscapine promotes the reaction [Cisplatin results in increased expression of and results in increased cleavage of CASP9 protein]	20674069
CASP9	Noscapine	Noscapine results in increased expression of and results in increased cleavage of CASP9 protein	20674069
CASP9	NSC 680410	NSC 680410 results in increased cleavage of and results in increased activity of CASP9 protein	14647418
CASP9	nutlin 3	[nutlin 3 co-treated with bortezomib] results in increased activity of CASP9 protein	20850924
CASP9	nutlin 3	nutlin 3 results in increased cleavage of and results in increased activity of CASP9 protein	16014563
CASP9	obacunone	obacunone results in increased activity of CASP9 protein	21333732
CASP9	ochratoxin A	ochratoxin A results in decreased expression of CASP9 mRNA	17316727
CASP9	ochratoxin A	ochratoxin A results in increased activity of CASP9 protein	15056805
CASP9	ochratoxin A	ochratoxin A results in increased cleavage of and results in increased activity of CASP9 protein	19367635
CASP9	ochratoxin A	ochratoxin A results in increased cleavage of CASP9 protein	20549612
CASP9	Oxidopamine	Oxidopamine results in increased activity of CASP9 protein	19780897|19781563
CASP9	Oxidopamine	sulforafan inhibits the reaction [Oxidopamine results in increased activity of CASP9 protein]	19780897
CASP9	Okadaic Acid	Okadaic Acid results in increased cleavage of and results in increased activity of CASP9 protein	19084044
CASP9	olaquindox	olaquindox results in decreased expression of CASP9 protein	21549799
CASP9	olaquindox	olaquindox results in increased activity of CASP9 protein	21549799
CASP9	oleylamide	oleylamide inhibits the reaction [[GJB1 protein co-treated with GJB2 protein] promotes the reaction [Cisplatin results in increased activity of CASP9 protein]]	23747833
CASP9	Organometallic Compounds	Organometallic Compounds results in decreased expression of CASP9 protein	21437708
CASP9	Organometallic Compounds	Organometallic Compounds results in increased activity of CASP9	18760261
CASP9	Organometallic Compounds	Organometallic Compounds results in increased cleavage of and results in increased activity of CASP9 protein	17210701
CASP9	Oxygen	iroxanadine inhibits the reaction [Oxygen deficiency results in increased activity of CASP9 protein]	15583868
CASP9	Oxygen	Oxygen deficiency results in increased activity of CASP9 protein	15583868
CASP9	Oxygen	Quercetin inhibits the reaction [iroxanadine inhibits the reaction [Oxygen deficiency results in increased activity of CASP9 protein]]	15583868
CASP9	Paclitaxel	[4-(6-cyclohexylmethoxy-9H-purin-2-ylamino)-N,N-diethylbenzamide co-treated with Paclitaxel] results in increased activity of CASP9 protein	16170024
CASP9	Paclitaxel	[6-((3-chloro)anilino)-2-(isopropyl-2-hydroxyethylamino)-9-isopropylpurine co-treated with Paclitaxel] results in increased activity of CASP9 protein	16170024
CASP9	Paclitaxel	[benzyloxycarbonyl-leucyl-glutamyl-histidyl-aspartic acid fluoromethyl ketone results in decreased activity of CASP9 protein] affects the reaction [SOD2 protein results in decreased susceptibility to Paclitaxel]	18594523
CASP9	Paclitaxel	[benzyloxycarbonyl-leucyl-glutamyl-histidyl-aspartic acid fluoromethyl ketone results in decreased activity of CASP9 protein] which results in decreased susceptibility to Paclitaxel	18594523
CASP9	Paclitaxel	CASP9 protein affects the susceptibility to Paclitaxel	17652622
CASP9	Paclitaxel	[Doxorubicin co-treated with Paclitaxel] results in increased activity of CASP9 protein	16168113
CASP9	Paclitaxel	Fluorouracil promotes the reaction [[Doxorubicin co-treated with Paclitaxel] results in increased activity of CASP9 protein]	16168113
CASP9	Paclitaxel	Paclitaxel results in increased activity of CASP9 protein	18098270
CASP9	Paclitaxel	Paclitaxel results in increased expression of CASP9 mRNA	18058816
CASP9	Paclitaxel	Paclitaxel results in increased expression of CASP9 protein	15907983
CASP9	Paclitaxel	[resveratrol co-treated with Paclitaxel] results in increased cleavage of and results in increased activity of CASP9 protein	14749477
CASP9	Paclitaxel	[Sirolimus co-treated with Paclitaxel] results in increased cleavage of CASP9 protein	15753396
CASP9	Paclitaxel	[Tretinoin co-treated with Paclitaxel] results in increased cleavage of and results in increased activity of CASP9 protein	17701358
CASP9	pamidronate	pamidronate results in increased cleavage of CASP9 protein	16298452
CASP9	panduratin A	panduratin A results in increased cleavage of CASP9 protein	16497706
CASP9	Paraquat	Paraquat results in decreased expression of CASP9 mRNA	18836921
CASP9	Paraquat	Paraquat results in increased activity of CASP9 protein	18253895
CASP9	Paraquat	Paraquat results in increased cleavage of CASP9 protein	22043816
CASP9	Paraquat	Paraquat results in increased expression of CASP9 mRNA alternative form	17064354
CASP9	Paraquat	PTGDS mutant form promotes the reaction [Paraquat results in increased cleavage of CASP9 protein]	22043816
CASP9	Paraquat	[PTGDS protein results in decreased susceptibility to Paraquat] which results in decreased cleavage of CASP9 protein	22043816
CASP9	Particulate Matter	Particulate Matter results in decreased expression of CASP9 protein	19675143
CASP9	Particulate Matter	Particulate Matter results in increased activity of CASP9 protein	16946128
CASP9	Particulate Matter	Particulate Matter results in increased cleavage of CASP9 protein	19675143
CASP9	Particulate Matter	pifithrin inhibits the reaction [Particulate Matter results in increased activity of CASP9 protein]	16946128
CASP9	Particulate Matter	TRP53 protein affects the reaction [Particulate Matter results in increased activity of CASP9 protein]	16946128
CASP9	PCI 5002	[PCI 5002 co-treated with Zinc] results in increased expression of CASP9 mRNA	18593933
CASP9	PD 169316	PD 169316 inhibits the reaction [Fenretinide results in increased cleavage of CASP9 protein]	16407847
CASP9	pentabromodiphenyl ether	pentabromodiphenyl ether results in increased activity of CASP9 protein	18453545
CASP9	Pentetic Acid	Pentetic Acid results in increased activity of CASP9 protein	17169355
CASP9	Pentoxifylline	[Pentoxifylline co-treated with TNFSF10 protein] results in increased activity of CASP9 protein	20804743
CASP9	perfluorooctane sulfonic acid	perfluorooctane sulfonic acid results in increased expression of CASP9 mRNA	19468714
CASP9	perfluorooctanoic acid	perfluorooctanoic acid results in increased expression of CASP9 mRNA	19468714
CASP9	phenethyl isothiocyanate	phenethyl isothiocyanate results in increased activity of CASP9 protein	16054126
CASP9	Phenylthiourea	Phenylthiourea results in increased expression of CASP9 protein	16447258
CASP9	Phloroglucinol	Phloroglucinol metabolite results in increased cleavage of CASP9 protein	22796323
CASP9	Phosphatidylcholines	[rubitecan co-treated with Phosphatidylcholines] results in increased expression of CASP9 protein	21695227
CASP9	phthalocyanine Pc 4	phthalocyanine Pc 4 results in increased cleavage of and results in increased activity of CASP9 protein	16007152
CASP9	phytosphingosine	3,4-dihydro-5-(4-(1-piperidinyl)butoxy)-1(2H)-isoquinolinone inhibits the reaction [[arsenic trioxide co-treated with phytosphingosine] results in increased activity of CASP9 protein]	17237268
CASP9	phytosphingosine	[arsenic trioxide co-treated with phytosphingosine] results in increased activity of CASP9 protein	17237268
CASP9	phytosphingosine	SB 203580 inhibits the reaction [[arsenic trioxide co-treated with phytosphingosine] results in increased activity of CASP9 protein]	17237268
CASP9	PI103	BCL2 protein inhibits the reaction [PI103 promotes the reaction [Doxorubicin results in increased cleavage of CASP9 protein]]	20856197
CASP9	PI103	PI103 promotes the reaction [Doxorubicin results in increased cleavage of CASP9 protein]	20856197
CASP9	PI103	TP53 protein promotes the reaction [PI103 promotes the reaction [Doxorubicin results in increased cleavage of CASP9 protein]]	20856197
CASP9	pifithrin	pifithrin inhibits the reaction [[decitabine co-treated with Busulfan] results in increased activity of CASP9 protein]	19732952
CASP9	pifithrin	pifithrin inhibits the reaction [nickel chloride results in increased activity of CASP9 protein]	23566959
CASP9	pifithrin	pifithrin inhibits the reaction [Particulate Matter results in increased activity of CASP9 protein]	16946128
CASP9	pifithrin	pifithrin inhibits the reaction [silybin results in increased cleavage of and results in increased activity of CASP9 protein]	16777994
CASP9	pimagedine	pimagedine promotes the reaction [chromium hexavalent ion results in increased activity of CASP9 protein]	19556603
CASP9	pimagedine	pimagedine promotes the reaction [sodium bichromate results in increased activity of CASP9 protein]	19556603
CASP9	Plant Extracts	Plant Extracts inhibits the reaction [TNFSF10 protein results in increased activity of CASP9 protein]	20971099
CASP9	Plant Extracts	Plant Extracts results in decreased expression of CASP9 protein	24021570
CASP9	Plant Extracts	Plant Extracts results in increased activity of CASP9 protein	17935706|18070620|20600805|22705325|24021570
CASP9	Plant Extracts	Plant Extracts results in increased cleavage of and results in increased activity of CASP9 protein	17619071
CASP9	Plant Extracts	Plant Extracts results in increased cleavage of CASP9 protein	20229524
CASP9	pluronic block copolymer p85	pluronic block copolymer p85 promotes the reaction [Doxorubicin results in increased expression of CASP9 mRNA]	15939500
CASP9	Poly(amidoamine)	Poly(amidoamine) results in increased cleavage of CASP9 protein	19643170
CASP9	Poly I-C	Acetylcysteine inhibits the reaction [arsenic trioxide promotes the reaction [Poly I-C results in increased activity of CASP9 protein]]	21418039
CASP9	Poly I-C	Acetylcysteine inhibits the reaction [Poly I-C promotes the reaction [arsenic trioxide results in increased activity of CASP9 protein]]	21418039
CASP9	Poly I-C	arsenic trioxide promotes the reaction [Poly I-C results in increased activity of CASP9 protein]	21418039
CASP9	Poly I-C	Poly I-C promotes the reaction [arsenic trioxide results in increased activity of CASP9 protein]	21418039
CASP9	Poly I-C	Poly I-C results in increased activity of CASP9 protein	21418039
CASP9	polylactic acid-polyglycolic acid copolymer	[polylactic acid-polyglycolic acid copolymer co-treated with Apigenin] results in increased expression of CASP9 mRNA	24070738
CASP9	polylactic acid-polyglycolic acid copolymer	[polylactic acid-polyglycolic acid copolymer co-treated with Apigenin] results in increased expression of CASP9 protein	24070738
CASP9	Polyphenols	Polyphenols results in decreased expression of CASP9 protein	24021570
CASP9	Polyphenols	Polyphenols results in increased activity of CASP9 protein	24021570
CASP9	polyphenon E	polyphenon E results in increased cleavage of CASP9 protein	23285096
CASP9	pramanicin	pramanicin analog results in increased activity of CASP9 protein	23441183
CASP9	pregna-4,17-diene-3,16-dione	pregna-4,17-diene-3,16-dione results in increased activity of CASP9 protein	17475222
CASP9	procyanidin B2	procyanidin B2 inhibits the reaction [MFGE8 protein results in increased activity of CASP9 protein]	21505870
CASP9	procyanidin B2	procyanidin B2 results in decreased activity of CASP9 protein	21505870
CASP9	Prodigiosin	Prodigiosin results in increased cleavage of CASP9 protein	15746575|19133282
CASP9	Propranolol	Propranolol results in increased cleavage of CASP9 protein	19106745
CASP9	pterostilbene	pterostilbene results in increased expression of CASP9 protein	20152895
CASP9	Pt(O,O'-acac)(gamma-acac)(DMS)	2-(2-amino-3-methoxyphenyl)-4H-1-benzopyran-4-one inhibits the reaction [Pt(O,O'-acac)(gamma-acac)(DMS) results in increased activity of CASP9 protein]	21420390
CASP9	Pt(O,O'-acac)(gamma-acac)(DMS)	anthra(1,9-cd)pyrazol-6(2H)-one inhibits the reaction [Pt(O,O'-acac)(gamma-acac)(DMS) results in increased activity of CASP9 protein]	21420390
CASP9	Pt(O,O'-acac)(gamma-acac)(DMS)	Pt(O,O'-acac)(gamma-acac)(DMS) results in increased activity of CASP9 protein	21420390
CASP9	Pt(O,O'-acac)(gamma-acac)(DMS)	SB 203580 inhibits the reaction [Pt(O,O'-acac)(gamma-acac)(DMS) results in increased activity of CASP9 protein]	21420390
CASP9	Pyrimethamine	Pyrimethamine results in increased activity of CASP9 protein	18593930
CASP9	pyrimidin-2-one beta-ribofuranoside	pyrimidin-2-one beta-ribofuranoside results in increased activity of CASP9 protein	23320119
CASP9	pyrithione zinc	pyrithione zinc results in increased activity of CASP9 protein	20151177
CASP9	pyrrolidine dithiocarbamic acid	pyrrolidine dithiocarbamic acid results in increased activity of CASP9 protein	12198114
CASP9	pyrrolo(2,1-c)(1,4)benzodiazepine	[naphthalene binds to pyrrolo(2,1-c)(1,4)benzodiazepine] which results in increased expression of CASP9 protein	21732540
CASP9	Quercetin	MCL1 protein inhibits the reaction [Quercetin results in increased activity of CASP9 protein]	21138867
CASP9	Quercetin	[Quercetin analog co-treated with Nickel] results in increased activity of CASP9 protein	20577783
CASP9	Quercetin	Quercetin inhibits the reaction [iroxanadine inhibits the reaction [Oxygen deficiency results in increased activity of CASP9 protein]]	15583868
CASP9	Quercetin	Quercetin promotes the reaction [TNFSF10 protein results in increased activity of CASP9 protein]	18377872
CASP9	Quercetin	Quercetin results in increased activity of CASP9 protein	17234771|21138867
CASP9	Quercetin	Quercetin results in increased cleavage of CASP9 protein	18331776|18787224|19397994
CASP9	Quercetin	[temozolomide co-treated with Quercetin] results in increased activity of CASP9 protein	24126416
CASP9	quercetin 3-O-beta-(2''-galloyl)-rhamnopyranoside	quercetin 3-O-beta-(2''-galloyl)-rhamnopyranoside inhibits the reaction [TNFSF10 protein results in increased activity of CASP9 protein]	23711929
CASP9	Ranitidine	Ranitidine inhibits the reaction [Rotenone results in increased cleavage of CASP9 protein]	19723537
CASP9	Reactive Oxygen Species	[[[[Lithocholic Acid results in increased abundance of Reactive Oxygen Species] which results in increased localization of and results in increased activity of FAS protein] which results in increased activity of CASP8 protein] which results in increased cleavage of BID protein] which results in increased activity of CASP9 protein	19054763
CASP9	Reactive Oxygen Species	[[[[[Lithocholic Acid results in increased abundance of Reactive Oxygen Species] which results in increased localization of and results in increased activity of FAS protein] which results in increased activity of CASP8 protein] which results in increased cleavage of BID protein] which results in increased activity of CASP9 protein] which results in increased activity of CASP3 protein	19054763
CASP9	Reactive Oxygen Species	manganese(III)-tetrakis(4-benzoic acid)porphyrin inhibits the reaction [[XCT790 results in increased abundance of Reactive Oxygen Species] which results in increased activity of CASP9 protein]	19464277
CASP9	Reactive Oxygen Species	[sanguinarine results in increased chemical synthesis of Reactive Oxygen Species] which results in increased activity of CASP9 protein	23660334
CASP9	Reactive Oxygen Species	[XCT790 results in increased abundance of Reactive Oxygen Species] which results in increased activity of CASP9 protein	19464277
CASP9	resveratrol	benzyloxycarbonyl-isoleucyl-glutamyl-threonyl-aspartic acid fluoromethyl ketone inhibits the reaction [[resveratrol results in increased activity of CASP8 protein] which results in increased activity of CASP9 protein]	19423619
CASP9	resveratrol	resveratrol analog results in increased activity of CASP9 protein	24398169
CASP9	resveratrol	[resveratrol co-treated with Paclitaxel] results in increased cleavage of and results in increased activity of CASP9 protein	14749477
CASP9	resveratrol	[resveratrol co-treated with TNFSF10 protein] results in increased activity of CASP9 protein	15763656
CASP9	resveratrol	resveratrol inhibits the reaction [benzo(e)pyrene results in increased activity of CASP9 protein]	19959636
CASP9	resveratrol	resveratrol inhibits the reaction [MFGE8 protein results in increased activity of CASP9 protein]	21505870
CASP9	resveratrol	resveratrol promotes the reaction [TNFSF10 protein results in increased cleavage of CASP9 protein]	17823925
CASP9	resveratrol	resveratrol promotes the reaction [Tobacco Smoke Pollution results in increased activity of CASP9 protein]	20060927
CASP9	resveratrol	resveratrol results in decreased activity of CASP9 protein	21505870
CASP9	resveratrol	[resveratrol results in increased activity of CASP8 protein] which results in increased activity of CASP9 protein	19423619
CASP9	resveratrol	resveratrol results in increased activity of CASP9 protein	11406544|15827328|17050787|18276737|19423619|19738051|20028382|20484155|20697895|20717957
CASP9	resveratrol	resveratrol results in increased cleavage of and results in increased activity of CASP9 protein	12902349|16617056|17636462
CASP9	resveratrol	resveratrol results in increased cleavage of CASP9 protein	18347188|23152798
CASP9	resveratrol	sirtinol inhibits the reaction [resveratrol results in increased activity of CASP9 protein]	20697895
CASP9	Riluzole	Riluzole results in increased activity of CASP9 protein	19528481
CASP9	romidepsin	bortezomib promotes the reaction [romidepsin results in increased cleavage of CASP9 protein]	18223231
CASP9	romidepsin	romidepsin results in increased cleavage of CASP9 protein	18223231
CASP9	ropinirole	ropinirole inhibits the reaction [Rotenone results in increased cleavage of CASP9 protein]	18242171
CASP9	ropivacaine	ropivacaine results in decreased expression of CASP9 protein	20194319
CASP9	roscovitine	roscovitine results in increased activity of CASP9 protein	16140939
CASP9	rosiglitazone	rosiglitazone results in increased activity of CASP9 protein	17506947
CASP9	Rotenone	3-Hydroxybutyric Acid inhibits the reaction [Rotenone results in increased activity of CASP9 protein]	16917840
CASP9	Rotenone	Ranitidine inhibits the reaction [Rotenone results in increased cleavage of CASP9 protein]	19723537
CASP9	Rotenone	ropinirole inhibits the reaction [Rotenone results in increased cleavage of CASP9 protein]	18242171
CASP9	Rotenone	Rotenone results in increased activity of CASP9 protein	16917840
CASP9	Rotenone	Rotenone results in increased cleavage of CASP9 protein	18242171|19539006|19723537
CASP9	Rotenone	Tranexamic Acid inhibits the reaction [Rotenone results in increased cleavage of CASP9 protein]	19539006
CASP9	rottlerin	rottlerin results in increased cleavage of CASP9 protein	22902833
CASP9	rubimaillin	BCL2L1 protein inhibits the reaction [rubimaillin results in increased activity of CASP9 protein]	19716835
CASP9	rubimaillin	benzyloxycarbonyl-leucyl-glutamyl-histidyl-aspartic acid fluoromethyl ketone affects the reaction [rubimaillin results in increased activity of CASP9 protein]	19716835
CASP9	rubimaillin	rubimaillin results in increased activity of CASP9 protein	19716835
CASP9	rubitecan	[rubitecan co-treated with Phosphatidylcholines] results in increased expression of CASP9 protein	21695227
CASP9	rubitecan	rubitecan results in increased expression of CASP9 protein	21695227
CASP9	Ruthenium	Ruthenium results in increased cleavage of and results in increased activity of CASP9 protein	17210701
CASP9	Ruthenium Compounds	Ruthenium Compounds results in decreased expression of CASP9 protein	21437708
CASP9	Ruthenium Compounds	Ruthenium Compounds results in increased cleavage of and results in increased activity of CASP9 protein	17210701
CASP9	S-(1,2-dichlorovinyl)cysteine	S-(1,2-dichlorovinyl)cysteine results in increased cleavage of CASP9 protein	15967204
CASP9	Safrole	Safrole results in increased activity of CASP9 protein	21591240
CASP9	Safrole	Safrole results in increased expression of CASP9 mRNA	21591240
CASP9	saikosaponin	saikosaponin results in increased cleavage of and results in increased activity of CASP9 protein	23994742
CASP9	saikosaponin	saikosaponin results in increased expression of CASP9 protein modified form	23994742
CASP9	salicylaldehyde isonicotinoyl hydrazone	salicylaldehyde isonicotinoyl hydrazone analog results in increased activity of CASP9 protein	22521999
CASP9	salvin	salvin promotes the reaction [arsenic trioxide results in increased activity of CASP9 protein]	23239002
CASP9	salvin	salvin results in increased activity of CASP9 protein	23239002
CASP9	sanguinarine	sanguinarine results in decreased expression of CASP9 protein alternative form	19135517
CASP9	sanguinarine	sanguinarine results in increased activity of CASP9 protein	19346183|22215411
CASP9	sanguinarine	[sanguinarine results in increased chemical synthesis of Reactive Oxygen Species] which results in increased activity of CASP9 protein	23660334
CASP9	Saponins	Saponins results in increased metabolism of CASP9 protein	12856725
CASP9	sappanchalcone	sappanchalcone results in increased activity of CASP9 protein	21963806
CASP9	Saquinavir	Saquinavir results in increased cleavage of CASP9 protein	19147209
CASP9	SB 203580	SB 203580 inhibits the reaction [[arsenic trioxide co-treated with phytosphingosine] results in increased activity of CASP9 protein]	17237268
CASP9	SB 203580	SB 203580 inhibits the reaction [Indomethacin results in increased activity of CASP9 protein]	17341418
CASP9	SB 203580	SB 203580 inhibits the reaction [Pt(O,O'-acac)(gamma-acac)(DMS) results in increased activity of CASP9 protein]	21420390
CASP9	SCIO-469	SCIO-469 promotes the reaction [bortezomib results in increased cleavage of CASP9 protein]	16617327
CASP9	Scorpion Venoms	Scorpion Venoms results in increased activity of CASP9 protein	19913524
CASP9	Scutellaria barbata extract	Scutellaria barbata extract results in increased cleavage of and results in increased activity of CASP9 protein	15369734
CASP9	S-dimethylaminoarsino-thiosuccinic acid	S-dimethylaminoarsino-thiosuccinic acid analog results in increased cleavage of CASP9 protein	19468689
CASP9	Selenium	BCL2L11 protein promotes the reaction [[Doxorubicin co-treated with Selenium] results in increased cleavage of and results in increased activity of CASP9 protein]	17339365
CASP9	Selenium	[Doxorubicin co-treated with Selenium] results in increased cleavage of and results in increased activity of CASP9 protein	17339365
CASP9	Sertraline	Sertraline results in increased cleavage of and results in increased activity of CASP9 protein	24194395
CASP9	Sesquiterpenes	Sesquiterpenes results in increased activity of CASP9 protein	18070620
CASP9	SH-6 compound	SH-6 compound results in increased activity of CASP9 protein	14990993
CASP9	shogaol	shogaol results in increased cleavage of and results in increased activity of CASP9 protein	18384088
CASP9	sildenafil	CASP9 protein affects the susceptibility to sildenafil	20884855
CASP9	sildenafil	CASP9 protein mutant form inhibits the reaction [sildenafil results in increased activity of Doxorubicin]	20884855
CASP9	sildenafil	sildenafil promotes the reaction [Doxorubicin results in increased activity of CASP9 protein]	20884855
CASP9	Silver Compounds	Silver Compounds results in increased activity of CASP9 protein	21182908
CASP9	silybin	benzoylcarbonyl-valyl-aspartyl-valyl-alanyl-aspartyl-fluoromethyl ketone inhibits the reaction [silybin results in increased cleavage of and results in increased activity of CASP9 protein]	16777994
CASP9	silybin	Caffeine inhibits the reaction [silybin results in increased cleavage of and results in increased activity of CASP9 protein]	16777994
CASP9	silybin	pifithrin inhibits the reaction [silybin results in increased cleavage of and results in increased activity of CASP9 protein]	16777994
CASP9	silybin	silybin results in increased cleavage of and results in increased activity of CASP9 protein	16777994
CASP9	Simvastatin	2-(4-morpholinyl)-8-phenyl-4H-1-benzopyran-4-one inhibits the reaction [Simvastatin results in decreased activity of CASP9 protein]	12438947
CASP9	Simvastatin	DIABLO protein promotes the reaction [Simvastatin results in increased activity of CASP9 protein]	20045437
CASP9	Simvastatin	Mevalonic Acid inhibits the reaction [Simvastatin results in increased cleavage of CASP9 protein]	20045437
CASP9	Simvastatin	Simvastatin results in decreased activity of CASP9 protein	12438947
CASP9	Simvastatin	Simvastatin results in increased activity of CASP9 protein	15705602|16470222
CASP9	Simvastatin	Simvastatin results in increased cleavage of and results in increased activity of CASP9 protein	19253821|20045437|21910007
CASP9	Simvastatin	Simvastatin results in increased cleavage of CASP9 protein	12962723
CASP9	Sirolimus	[7-hydroxystaurosporine co-treated with Sirolimus] results in increased cleavage of CASP9 protein	15767555
CASP9	Sirolimus	[Curcumin co-treated with Sirolimus] results in increased activity of CASP9 protein	19373661
CASP9	Sirolimus	[Sirolimus co-treated with Cisplatin] results in increased activity of CASP9 protein	20138251
CASP9	Sirolimus	[Sirolimus co-treated with Paclitaxel] results in increased cleavage of CASP9 protein	15753396
CASP9	Sirolimus	Sirolimus promotes the reaction [Cisplatin results in increased cleavage of CASP9 protein]	18058806
CASP9	Sirolimus	[tanespimycin co-treated with Sirolimus] results in increased cleavage of CASP9 protein	17121904
CASP9	sirtinol	sirtinol inhibits the reaction [resveratrol results in increased activity of CASP9 protein]	20697895
CASP9	SNX 2112	SNX 2112 results in increased expression of CASP9 protein modified form	23777986
CASP9	sodium arsenite	Acetylcysteine inhibits the reaction [[sodium arsenite co-treated with Vitamin K 3] results in increased activity of CASP9 protein]	19082730
CASP9	sodium arsenite	[sodium arsenite co-treated with Vitamin K 3] results in increased activity of CASP9 protein	19082730
CASP9	sodium bichromate	CAT protein inhibits the reaction [sodium bichromate results in increased activity of CASP9 protein]	18544562
CASP9	sodium bichromate	dipropylenetriamine-NONOate inhibits the reaction [sodium bichromate results in increased activity of CASP9 protein]	19556603
CASP9	sodium bichromate	manganese(III)-tetrakis(4-benzoic acid)porphyrin inhibits the reaction [sodium bichromate results in increased activity of CASP9 protein]	18544562
CASP9	sodium bichromate	pimagedine promotes the reaction [sodium bichromate results in increased activity of CASP9 protein]	19556603
CASP9	sodium bichromate	sodium bichromate results in increased activity of CASP9 protein	18544562|19556603
CASP9	Sodium Fluoride	Sodium Fluoride results in increased cleavage of and results in increased activity of CASP9 protein	21708216
CASP9	Sodium Selenite	Sodium Selenite results in increased expression of CASP9 mRNA	16705456
CASP9	sorafenib	AKT1 protein inhibits the reaction [[bortezomib co-treated with sorafenib] results in increased cleavage of CASP9 protein]	16985072
CASP9	sorafenib	[bortezomib co-treated with sorafenib] results in increased cleavage of CASP9 protein	16985072
CASP9	sorafenib	MCL1 protein inhibits the reaction [sorafenib results in increased cleavage of and results in increased activity of CASP9 protein]	16109713
CASP9	sorafenib	[sorafenib co-treated with 2-(2-chloro-4-iodophenylamino)-N-cyclopropylmethoxy-3,4-difluorobenzamide] results in increased cleavage of CASP9 protein	20117835
CASP9	sorafenib	[sorafenib co-treated with TNFSF10 protein] results in increased cleavage of and results in increased activity of CASP9 protein	17909059
CASP9	sorafenib	[sorafenib co-treated with TNFSF10 protein] results in increased cleavage of CASP9 protein	20071162
CASP9	sorafenib	sorafenib results in increased activity of CASP9 protein	21293487
CASP9	sorafenib	sorafenib results in increased cleavage of and results in increased activity of CASP9 protein	16109713
CASP9	sorafenib	sorafenib results in increased cleavage of CASP9 protein	18200035|20054642|20071162
CASP9	Staurosporine	ACHE protein affects the susceptibility to [Staurosporine results in increased activity of CASP9 protein]	20338155
CASP9	Staurosporine	Staurosporine results in increased activity of CASP9 protein	19352495|20338155
CASP9	Staurosporine	Staurosporine results in increased cleavage of and results in increased activity of CASP9 protein	16007152
CASP9	Stilbenes	Stilbenes results in increased activity of CASP9 protein	22293408|23059970
CASP9	Stilbenes	[Stilbenes results in increased activity of CASP9 protein] which results in increased cleavage of CASP3 protein	22293408
CASP9	suillin	suillin results in increased cleavage of and results in increased activity of CASP9 protein	19616521
CASP9	Sulfasalazine	Sulfasalazine inhibits the reaction [Glycochenodeoxycholic Acid results in increased activity of CASP9 protein]	16322111
CASP9	Sulfasalazine	Sulfasalazine results in increased cleavage of CASP9 protein	19859796
CASP9	sulforafan	sulforafan inhibits the reaction [Oxidopamine results in increased activity of CASP9 protein]	19780897
CASP9	Sulindac	[Sulindac co-treated with arsenic trioxide] results in increased activity of CASP9 protein	18281123
CASP9	Sulindac	Sulindac results in increased activity of CASP9 protein	15713900
CASP9	Sulindac	[Sulindac results in increased expression of IL24 protein] which results in increased expression of CASP9 protein	15713900
CASP9	sulindac sulfide	BAX protein affects the reaction [TNFSF10 protein promotes the reaction [sulindac sulfide results in increased cleavage of and results in increased activity of CASP9 protein]]	12203115
CASP9	sulindac sulfide	PTGS2 protein inhibits the reaction [sulindac sulfide results in increased activity of CASP9 protein]	12414664
CASP9	sulindac sulfide	sulindac sulfide results in increased activity of CASP9 protein	12414664
CASP9	sulindac sulfide	sulindac sulfide results in increased cleavage of and results in increased activity of CASP9 protein	12203115
CASP9	sulindac sulfide	TNFSF10 protein promotes the reaction [sulindac sulfide results in increased cleavage of and results in increased activity of CASP9 protein]	12203115
CASP9	surfactin peptide	surfactin peptide results in increased cleavage of and results in increased activity of CASP9 protein	19954742
CASP9	T-2 Toxin	T-2 Toxin results in increased activity of CASP9 protein	19524637
CASP9	Tacrolimus	Tacrolimus inhibits the reaction [FAS protein results in increased activity of CASP9 protein]	15548389
CASP9	tamibarotene	tamibarotene results in increased expression of CASP9 mRNA	15498508
CASP9	Tamoxifen	AKT1 protein inhibits the reaction [Tamoxifen analog results in increased activity of CASP9 protein]	14990993
CASP9	Tamoxifen	AKT1 protein inhibits the reaction [Tamoxifen results in increased activity of CASP9 protein]	14990993
CASP9	Tamoxifen	[methylselenic acid co-treated with Tamoxifen] results in increased cleavage of CASP9 protein	18790785
CASP9	Tamoxifen	[[methylselenic acid co-treated with Tamoxifen] results in increased cleavage of CASP9 protein] which results in increased cleavage of CASP8 protein	18790785
CASP9	Tamoxifen	Tamoxifen analog results in increased activity of CASP9 protein	14990993
CASP9	Tamoxifen	[Tamoxifen co-treated with TNFSF10 protein] results in increased cleavage of CASP9 protein	17767197
CASP9	Tamoxifen	Tamoxifen results in increased activity of CASP9 protein	14990993
CASP9	Tamoxifen	Tamoxifen results in increased cleavage of CASP9 protein	17767197
CASP9	tanespimycin	[tanespimycin co-treated with Sirolimus] results in increased cleavage of CASP9 protein	17121904
CASP9	tanespimycin	tanespimycin results in increased cleavage of CASP9 protein	17121904
CASP9	Taurodeoxycholic Acid	Taurodeoxycholic Acid results in increased activity of CASP9 protein	12773247
CASP9	Taurodeoxycholic Acid	tauroursodeoxycholic acid inhibits the reaction [Taurodeoxycholic Acid results in increased activity of CASP9 protein]	12773247
CASP9	tauroursodeoxycholic acid	[Chenodeoxycholic Acid co-treated with tauroursodeoxycholic acid] results in increased activity of CASP9 protein	14976352
CASP9	tauroursodeoxycholic acid	tauroursodeoxycholic acid inhibits the reaction [Taurodeoxycholic Acid results in increased activity of CASP9 protein]	12773247
CASP9	tcdA protein, Clostridium difficile	tcdA protein, Clostridium difficile results in increased activity of CASP9 protein	16368960
CASP9	temozolomide	[temozolomide co-treated with Quercetin] results in increased activity of CASP9 protein	24126416
CASP9	Terfenadine	Terfenadine results in increased activity of CASP9 protein	16569656
CASP9	Terfenadine	Terfenadine results in increased cleavage of CASP9 protein	20570632
CASP9	Testosterone	gingerol inhibits the reaction [Testosterone results in decreased expression of CASP9 protein]	18030663
CASP9	Testosterone	Testosterone results in decreased expression of CASP9 protein	18030663
CASP9	Tetrachlorodibenzodioxin	Tetrachlorodibenzodioxin results in decreased expression of CASP9 mRNA	23152189
CASP9	tetracycline CMT-3	celecoxib promotes the reaction [tetracycline CMT-3 results in increased cleavage of and results in increased activity of CASP9 protein]	15688368
CASP9	tetracycline CMT-3	tetracycline CMT-3 promotes the reaction [celecoxib results in increased cleavage of and results in increased activity of CASP9 protein]	15688368
CASP9	tetracycline CMT-3	tetracycline CMT-3 results in increased activity of CASP9 protein	16039551
CASP9	tetracycline CMT-3	tetracycline CMT-3 results in increased cleavage of and results in increased activity of CASP9 protein	15688368
CASP9	Tetradecanoylphorbol Acetate	[Glucose deficiency co-treated with Tetradecanoylphorbol Acetate] results in increased activity of CASP9 protein	17309078
CASP9	Thalidomide	Thalidomide results in decreased activity of CASP9 protein	15067094
CASP9	Thapsigargin	Diclofenac inhibits the reaction [Thapsigargin results in increased activity of CASP9 protein]	16388830
CASP9	Thapsigargin	Melatonin inhibits the reaction [Thapsigargin results in increased activity of CASP9 protein]	20130848
CASP9	Thapsigargin	Thapsigargin results in increased activity of CASP9 protein	16388830|20130848
CASP9	theaflavin	theaflavin results in increased cleavage of and results in increased activity of CASP9 protein	17499812
CASP9	Thimerosal	Glutathione inhibits the reaction [Thimerosal results in increased activity of CASP9 protein]	12140745
CASP9	Thimerosal	Thimerosal results in increased activity of CASP9 protein	12140745
CASP9	Thimerosal	Thimerosal results in increased cleavage of CASP9 protein	15869795
CASP9	Thiocarbamates	Thiocarbamates results in increased activity of CASP9 protein	20209498
CASP9	Thioctic Acid	Thioctic Acid results in increased activity of CASP9 protein	16990509
CASP9	Thiosemicarbazones	[Thiosemicarbazones binds to Copper] which results in increased expression of CASP9 protein	20931265
CASP9	thiosulfinic acids	thiosulfinic acids results in increased activity of CASP9 protein	19446247
CASP9	Thymidine	Thymidine inhibits the reaction [Adenosine results in increased activity of CASP9 protein]	11570579
CASP9	thymiplatin	thymiplatin results in increased activity of CASP9 protein	20981665
CASP9	Thymol	Thymol results in increased activity of CASP9 protein	21640085
CASP9	titanium dioxide	titanium dioxide results in increased activity of CASP9 protein	20541599
CASP9	titanium dioxide	titanium dioxide results in increased cleavage of CASP9 protein	20362650
CASP9	Tobacco Smoke Pollution	resveratrol promotes the reaction [Tobacco Smoke Pollution results in increased activity of CASP9 protein]	20060927
CASP9	Tobacco Smoke Pollution	Tobacco Smoke Pollution results in increased activity of CASP9 protein	20060927
CASP9	Tosylphenylalanyl Chloromethyl Ketone	Tosylphenylalanyl Chloromethyl Ketone results in increased cleavage of and results in increased activity of CASP9 protein	19679660
CASP9	Tranexamic Acid	Tranexamic Acid inhibits the reaction [Rotenone results in increased cleavage of CASP9 protein]	19539006
CASP9	Tretinoin	CRABP2 protein promotes the reaction [Tretinoin results in increased cleavage of and results in increased activity of CASP9 protein]	16166294
CASP9	Tretinoin	CRABP2 protein promotes the reaction [Tretinoin results in increased expression of CASP9 mRNA]	16166294
CASP9	Tretinoin	[IFNB1 protein co-treated with Tretinoin] results in increased cleavage of and results in increased activity of CASP9 protein	16826196
CASP9	Tretinoin	[Tretinoin co-treated with Paclitaxel] results in increased cleavage of and results in increased activity of CASP9 protein	17701358
CASP9	Tretinoin	Tretinoin promotes the reaction [[GJB1 protein co-treated with GJB2 protein] promotes the reaction [Cisplatin results in increased activity of CASP9 protein]]	23747833
CASP9	Tretinoin	Tretinoin results in increased activity of CASP9 protein	16568081
CASP9	Tretinoin	Tretinoin results in increased cleavage of and results in increased activity of CASP9 protein	16166294|17387344
CASP9	Tretinoin	Tretinoin results in increased expression of CASP9 mRNA	15498508|16166294
CASP9	Triamcinolone	Triamcinolone results in increased activity of CASP9 protein	11734450
CASP9	trichostatin A	[bortezomib co-treated with trichostatin A] results in increased cleavage of and results in increased activity of CASP9 protein	16904634
CASP9	trichostatin A	[trichostatin A co-treated with bortezomib] results in increased cleavage of CASP9 protein	21345073
CASP9	trichostatin A	trichostatin A promotes the reaction [CASP9 protein affects the localization of BID protein]	12556448
CASP9	trichostatin A	trichostatin A results in increased cleavage of and results in increased activity of CASP9 protein	16010430
CASP9	Trientine	Trientine results in increased activity of CASP9 protein	14513838
CASP9	Trifluridine	Trifluridine results in increased cleavage of CASP9 protein	19816940
CASP9	trimethylenediamine	[Copper binds to Isatin binds to trimethylenediamine] which results in increased cleavage of CASP9 protein	17327230
CASP9	tripterine	tripterine results in increased cleavage of CASP9 protein	21466843
CASP9	troglitazone	GSK3B protein affects the susceptibility to [troglitazone results in increased expression of CASP9 protein]	20540935
CASP9	troglitazone	[N-(4-methoxybenzyl)-N'-(5-nitro-1,3-thiazol-2-yl)urea results in decreased activity of GSK3B protein] results in increased susceptibility to [troglitazone results in increased expression of CASP9 protein]	20540935
CASP9	troglitazone	troglitazone results in increased activity of CASP9 protein	14508522
CASP9	troglitazone	troglitazone results in increased expression of CASP9 protein	20540935
CASP9	trovafloxacin	[trovafloxacin co-treated with TNF protein] results in increased activity of CASP9 protein	24097668
CASP9	Trypsin Inhibitors	Trypsin Inhibitors results in increased activity of CASP9 protein	19481592
CASP9	Tunicamycin	Diclofenac inhibits the reaction [Tunicamycin results in increased activity of CASP9 protein]	16388830
CASP9	Tunicamycin	Tunicamycin results in increased activity of CASP9 protein	16388830
CASP9	Tunicamycin	Tunicamycin results in increased cleavage of CASP9 protein	17553788
CASP9	U 0126	U 0126 inhibits the reaction [Indomethacin results in increased activity of CASP9 protein]	17341418
CASP9	Ursodeoxycholic Acid	Ursodeoxycholic Acid inhibits the reaction [Nitroprusside results in increased activity of CASP9 protein]	22178905
CASP9	Valproic Acid	Valproic Acid results in increased cleavage of and results in increased activity of CASP9 protein	22814014
CASP9	vaticanol C	vaticanol C results in increased activity of CASP9 protein	12844481
CASP9	Cholecalciferol	Cholecalciferol results in decreased expression of CASP9 protein	18628207
CASP9	Vitamin E	Vitamin E results in increased expression of CASP9 mRNA	19244175
CASP9	Vitamin K 3	Acetylcysteine inhibits the reaction [[sodium arsenite co-treated with Vitamin K 3] results in increased activity of CASP9 protein]	19082730
CASP9	Vitamin K 3	[sodium arsenite co-treated with Vitamin K 3] results in increased activity of CASP9 protein	19082730
CASP9	vorinostat	[bortezomib co-treated with vorinostat] results in increased activity of CASP9 protein	18005386|18641367
CASP9	vorinostat	[bortezomib co-treated with vorinostat] results in increased cleavage of and results in increased activity of CASP9 protein	12893773
CASP9	vorinostat	bortezomib promotes the reaction [vorinostat results in increased activity of CASP9 protein]	15173093
CASP9	vorinostat	[vorinostat co-treated with TNFSF10 protein] results in increased cleavage of and results in increased activity of CASP9 protein	19643600
CASP9	vorinostat	vorinostat results in increased activity of CASP9 protein	15173093|18025281|19737941
CASP9	vorinostat	vorinostat results in increased cleavage of CASP9 protein	15897598
CASP9	Weichang'an	Weichang'an results in increased cleavage of CASP9 protein	17498489
CASP9	wortmannin	ABT-737 promotes the reaction [wortmannin promotes the reaction [celecoxib results in increased cleavage of CASP9 protein]]	20104024
CASP9	wortmannin	wortmannin promotes the reaction [celecoxib results in increased cleavage of CASP9 protein]	20104024
CASP9	wortmannin	wortmannin promotes the reaction [Doxorubicin results in increased cleavage of CASP9 protein]	17935137
CASP9	wortmannin	wortmannin promotes the reaction [Etoposide results in increased cleavage of CASP9 protein]	17935137
CASP9	WP 744	WP 744 results in increased cleavage of CASP9 protein	15555623
CASP9	xanthohumol	xanthohumol results in increased cleavage of and results in increased activity of CASP9 protein	15995977
CASP9	XCT790	manganese(III)-tetrakis(4-benzoic acid)porphyrin inhibits the reaction [[XCT790 results in increased abundance of Reactive Oxygen Species] which results in increased activity of CASP9 protein]	19464277
CASP9	XCT790	[XCT790 results in increased abundance of Reactive Oxygen Species] which results in increased activity of CASP9 protein	19464277
CASP9	Ytterbium	Ytterbium analog results in increased activity of CASP9 protein	19632212
CASP9	Zinc	[PCI 5002 co-treated with Zinc] results in increased expression of CASP9 mRNA	18593933
CASP9	Ziram	Ziram results in increased activity of CASP9 protein	22159898
CASP9	zoledronic acid	zoledronic acid results in increased activity of CASP9 protein	19036117
CASP9	zoledronic acid	zoledronic acid results in increased cleavage of and results in increased activity of CASP9 protein	12799645
CCL4	15-acetyldeoxynivalenol	15-acetyldeoxynivalenol results in increased expression of CCL4 mRNA	23792671
CCL4	2,2',4,4'-tetrabromodiphenyl ether	2,2',4,4'-tetrabromodiphenyl ether inhibits the reaction [Lipopolysaccharides results in increased secretion of CCL4 protein]	19211157
CCL4	2-methylthio-ADP	2-methylthio-ADP results in decreased secretion of CCL4 protein	16856976
CCL4	3-(2-hydroxy-4-(1,1-dimethylheptyl)phenyl)-4-(3-hydroxypropyl)cyclohexanol	[3-(2-hydroxy-4-(1,1-dimethylheptyl)phenyl)-4-(3-hydroxypropyl)cyclohexanol binds to and results in increased activity of CNR2 protein] which results in increased expression of CCL4 mRNA	10821843
CCL4	4-aminobenzhydrazide	4-aminobenzhydrazide inhibits the reaction [hydroxyhydroquinone results in increased expression of CCL4 mRNA]	24530881
CCL4	4-phenylenediamine	4-phenylenediamine results in increased expression of CCL4 mRNA	20713136
CCL4	5-chloro-2-methyl-4-isothiazolin-3-one	5-chloro-2-methyl-4-isothiazolin-3-one results in increased expression of CCL4 protein	18353026
CCL4	alclometasone dipropionate	alclometasone dipropionate results in increased expression of CCL4 protein	20116850
CCL4	alexidine	alexidine results in decreased expression of CCL4 protein	20116850
CCL4	Alum Compounds	Alum Compounds results in increased secretion of CCL4 protein	18390722
CCL4	Aluminum Hydroxide	Aluminum Hydroxide results in increased secretion of CCL4 protein	18390722
CCL4	Anisomycin	Anisomycin results in decreased expression of CCL4 protein	20116850
CCL4	Antimycin A	Antimycin A results in decreased expression of CCL4 protein	20116850
CCL4	Arsenic	Arsenic results in decreased expression of CCL4 mRNA	16835338
CCL4	arsenic trioxide	[arsenic trioxide co-treated with Tretinoin] results in increased expression of CCL4 mRNA	19828696
CCL4	arsenite	arsenite affects the expression of CCL4 mRNA	22959463
CCL4	Asbestos, Amphibole	Asbestos, Amphibole results in decreased expression of CCL4 protein	20855422
CCL4	Bandrowski's base	Bandrowski's base affects the expression of CCL4 mRNA	18202158
CCL4	Beclomethasone	Beclomethasone results in increased expression of CCL4 protein	20116850
CCL4	Benzalkonium Compounds	Benzalkonium Compounds results in decreased expression of CCL4 mRNA	20713136
CCL4	Benzalkonium Compounds	Benzalkonium Compounds results in decreased expression of CCL4 protein	18353026
CCL4	Benzethonium	Benzethonium results in decreased expression of CCL4 protein	20116850
CCL4	Benzocaine	Benzocaine results in increased expression of CCL4 protein	18353026
CCL4	Benzo(a)pyrene	Benzo(a)pyrene results in decreased expression of CCL4 mRNA	20064835
CCL4	benzoquinone	benzoquinone results in increased expression of CCL4 protein	17572062
CCL4	beryllium sulfate	beryllium sulfate results in increased secretion of CCL4 mRNA	16314022
CCL4	beta-hydroxy simvastatin acid	beta-hydroxy simvastatin acid results in decreased expression of CCL4 mRNA	18192240
CCL4	Betamethasone	Betamethasone results in increased expression of CCL4 protein	20116850
CCL4	Budesonide	Budesonide results in increased expression of CCL4 protein	20116850
CCL4	Camptothecin	Camptothecin results in decreased expression of CCL4 protein	20116850
CCL4	captax	captax results in increased secretion of CCL4 protein	16314067
CCL4	catechol	catechol results in increased expression of CCL4 protein	17572062
CCL4	cephaelin	cephaelin results in decreased expression of CCL4 protein	20116850
CCL4	Chrysenes	Chrysenes results in decreased expression of CCL4 protein	20116850
CCL4	clopidogrel	clopidogrel results in increased expression of CCL4 mRNA	16856976
CCL4	cobalt sulfate	cobalt sulfate results in increased expression of CCL4 mRNA	20713136
CCL4	cobalt sulfate	cobalt sulfate results in increased secretion of CCL4 protein	16314067
CCL4	coralyne	coralyne results in decreased expression of CCL4 protein	20116850
CCL4	dasatinib	dasatinib results in decreased expression of CCL4 protein	17962511
CCL4	Daunorubicin	Daunorubicin results in decreased expression of CCL4 protein	20116850
CCL4	Demecolcine	Demecolcine results in increased expression of CCL4 mRNA	23649840
CCL4	deoxynivalenol	deoxynivalenol results in increased expression of CCL4 mRNA	22846391
CCL4	Dequalinium	Dequalinium results in decreased expression of CCL4 protein	20116850
CCL4	Digitoxigenin	Digitoxigenin results in decreased expression of CCL4 protein	20116850
CCL4	Digoxigenin	Digoxigenin results in decreased expression of CCL4 protein	20116850
CCL4	Digoxin	Digoxin results in decreased expression of CCL4 protein	20116850
CCL4	Dinitrochlorobenzene	Dinitrochlorobenzene results in increased expression of CCL4 mRNA	15585374|16314067|20146380
CCL4	Dinitrochlorobenzene	Dinitrochlorobenzene results in increased expression of CCL4 protein	16314067|18353026
CCL4	Dinitrochlorobenzene	Dinitrochlorobenzene results in increased secretion of CCL4 protein	16314067
CCL4	Dinitrofluorobenzene	Dinitrofluorobenzene results in increased expression of CCL4 protein	18353026
CCL4	Dust	Dust results in increased expression of CCL4 mRNA	17805423
CCL4	Emetine	Emetine results in decreased expression of CCL4 protein	20116850
CCL4	enterotoxin B, staphylococcal	enterotoxin B, staphylococcal results in increased expression of CCL4 protein	19874226
CCL4	enterotoxin B, staphylococcal	tigecycline inhibits the reaction [enterotoxin B, staphylococcal results in increased expression of CCL4 protein]	19874226
CCL4	enterotoxin F, Staphylococcal	enterotoxin F, Staphylococcal results in increased expression of CCL4 protein	19874226
CCL4	enterotoxin F, Staphylococcal	tigecycline inhibits the reaction [enterotoxin F, Staphylococcal results in increased expression of CCL4 protein]	19874226
CCL4	Ethyl Methanesulfonate	Ethyl Methanesulfonate results in decreased expression of CCL4 mRNA	23649840
CCL4	Eugenol	Eugenol results in increased expression of CCL4 mRNA	15585374
CCL4	Eugenol	Eugenol results in increased expression of CCL4 protein	18353026
CCL4	Fludrocortisone	Fludrocortisone results in increased expression of CCL4 protein	20116850
CCL4	Genistein	Genistein results in decreased expression of CCL4 mRNA	15256057
CCL4	Glutaral	Glutaral results in increased expression of CCL4 mRNA	20713136
CCL4	hexyl cinnamic aldehyde	hexyl cinnamic aldehyde results in increased expression of CCL4 protein	18353026
CCL4	Hydralazine	[Hydralazine co-treated with Valproic Acid] results in increased expression of CCL4 mRNA	17183730
CCL4	Hydrocortisone	Hydrocortisone results in increased expression of CCL4 protein	20116850
CCL4	hydroquinone	hydroquinone results in increased expression of CCL4 protein	17572062|18353026
CCL4	hydroxyhydroquinone	4-aminobenzhydrazide inhibits the reaction [hydroxyhydroquinone results in increased expression of CCL4 mRNA]	24530881
CCL4	hydroxyhydroquinone	hydroxyhydroquinone affects the expression of CCL4 protein	17572062
CCL4	hydroxyhydroquinone	hydroxyhydroquinone results in increased expression of CCL4 mRNA	24530881
CCL4	indirubin-3'-monoxime	[indirubin-3'-monoxime co-treated with Tetradecanoylphorbol Acetate] results in decreased expression of CCL4 mRNA	18958680
CCL4	Indomethacin	Dinoprostone inhibits the reaction [Indomethacin inhibits the reaction [Roflumilast inhibits the reaction [Lipopolysaccharides results in increased secretion of CCL4 protein]]]	21913898
CCL4	Indomethacin	Indomethacin inhibits the reaction [Roflumilast inhibits the reaction [Lipopolysaccharides results in increased secretion of CCL4 protein]]	21913898
CCL4	Ionomycin	[Ionomycin co-treated with Tetradecanoylphorbol Acetate] results in increased secretion of CCL4 protein	17685462
CCL4	Ionomycin	sodium bichromate inhibits the reaction [[Ionomycin co-treated with Tetradecanoylphorbol Acetate] results in increased secretion of CCL4 protein]	17685462
CCL4	Ionomycin	[Tetradecanoylphorbol Acetate co-treated with Ionomycin] results in increased expression of CCL4 protein	17572062
CCL4	Lactic Acid	Lactic Acid results in decreased expression of CCL4 protein	18353026
CCL4	lanatoside C	lanatoside C results in decreased expression of CCL4 protein	20116850
CCL4	Lipopolysaccharides	2,2',4,4'-tetrabromodiphenyl ether inhibits the reaction [Lipopolysaccharides results in increased secretion of CCL4 protein]	19211157
CCL4	Lipopolysaccharides	Dinoprostone inhibits the reaction [Indomethacin inhibits the reaction [Roflumilast inhibits the reaction [Lipopolysaccharides results in increased secretion of CCL4 protein]]]	21913898
CCL4	Lipopolysaccharides	Dinoprostone promotes the reaction [Roflumilast inhibits the reaction [Lipopolysaccharides results in increased secretion of CCL4 protein]]	21913898
CCL4	Lipopolysaccharides	Dinoprostone promotes the reaction [roflumilast N-oxide inhibits the reaction [Lipopolysaccharides results in increased secretion of CCL4 protein]]	21913898
CCL4	Lipopolysaccharides	Indomethacin inhibits the reaction [Roflumilast inhibits the reaction [Lipopolysaccharides results in increased secretion of CCL4 protein]]	21913898
CCL4	Lipopolysaccharides	Lipopolysaccharides results in decreased expression of CCL4 mRNA	22777745
CCL4	Lipopolysaccharides	Lipopolysaccharides results in increased expression of CCL4 mRNA	17529908
CCL4	Lipopolysaccharides	Lipopolysaccharides results in increased expression of CCL4 protein	15788441|19020770|21352583
CCL4	Lipopolysaccharides	Lipopolysaccharides results in increased secretion of CCL4 protein	15289356|18390722|19211157|21913898
CCL4	Lipopolysaccharides	Roflumilast inhibits the reaction [Lipopolysaccharides results in increased secretion of CCL4 protein]	21913898
CCL4	Lipopolysaccharides	roflumilast N-oxide inhibits the reaction [Lipopolysaccharides results in increased secretion of CCL4 protein]	21913898
CCL4	Lipopolysaccharides	[usnic acid co-treated with Lipopolysaccharides] results in increased expression of CCL4 mRNA	22777745
CCL4	meclocycline	meclocycline results in decreased expression of CCL4 protein	20116850
CCL4	Methionine Sulfoximine	Methionine Sulfoximine results in decreased expression of CCL4 protein	20116850
CCL4	Methotrexate	Methotrexate results in decreased expression of CCL4 mRNA	17400583
CCL4	Methotrexate	Methotrexate results in decreased expression of CCL4 protein	19100307
CCL4	Methotrexate	SB 203580 affects the reaction [Methotrexate results in decreased expression of CCL4 protein]	19100307
CCL4	methylbenzethonium	methylbenzethonium results in decreased expression of CCL4 protein	20116850
CCL4	Methyl Methanesulfonate	Methyl Methanesulfonate results in decreased expression of CCL4 mRNA	23649840
CCL4	Mevalonic Acid	Mevalonic Acid inhibits the reaction [Simvastatin inhibits the reaction [IFNG results in increased expression of CCL4 mRNA]]	16321392
CCL4	Mevalonic Acid	Mevalonic Acid inhibits the reaction [Simvastatin inhibits the reaction [TNF results in increased expression of CCL4 mRNA]]	16321392
CCL4	MF59 oil emulsion	MF59 oil emulsion results in increased secretion of CCL4 protein	18390722
CCL4	Minocycline	Minocycline results in decreased expression of CCL4 protein	20116850
CCL4	Mustard Gas	Mustard Gas results in increased expression of CCL4 protein	17720292
CCL4	nickel sulfate	nickel sulfate results in increased expression of CCL4 mRNA	12060402|15585374|16314067|16780908|20713136
CCL4	nickel sulfate	nickel sulfate results in increased expression of CCL4 protein	16314067|18353026
CCL4	nickel sulfate	nickel sulfate results in increased secretion of CCL4 protein	16314067
CCL4	Oxazolone	Oxazolone results in increased expression of CCL4 mRNA	15585374
CCL4	Oxytetracycline	Oxytetracycline results in decreased expression of CCL4 protein	20116850
CCL4	palmatine	palmatine results in decreased expression of CCL4 protein	20116850
CCL4	Penicillamine	Penicillamine results in increased expression of CCL4 mRNA	22843330
CCL4	Dinoprostone	Dinoprostone inhibits the reaction [Indomethacin inhibits the reaction [Roflumilast inhibits the reaction [Lipopolysaccharides results in increased secretion of CCL4 protein]]]	21913898
CCL4	Dinoprostone	Dinoprostone promotes the reaction [Roflumilast inhibits the reaction [Lipopolysaccharides results in increased secretion of CCL4 protein]]	21913898
CCL4	Dinoprostone	Dinoprostone promotes the reaction [roflumilast N-oxide inhibits the reaction [Lipopolysaccharides results in increased secretion of CCL4 protein]]	21913898
CCL4	Dinoprostone	Dinoprostone results in decreased expression of CCL4 mRNA	16303787
CCL4	Picibanil	Picibanil results in increased secretion of CCL4 protein	15289356
CCL4	Potassium Dichromate	Potassium Dichromate results in increased expression of CCL4 protein	18353026
CCL4	Prednisolone	Prednisolone results in increased expression of CCL4 protein	20116850
CCL4	Propidium	Propidium results in decreased expression of CCL4 protein	20116850
CCL4	Proscillaridin	Proscillaridin results in decreased expression of CCL4 protein	20116850
CCL4	Puromycin	Puromycin results in decreased expression of CCL4 protein	20116850
CCL4	Roflumilast	Dinoprostone inhibits the reaction [Indomethacin inhibits the reaction [Roflumilast inhibits the reaction [Lipopolysaccharides results in increased secretion of CCL4 protein]]]	21913898
CCL4	Roflumilast	Dinoprostone promotes the reaction [Roflumilast inhibits the reaction [Lipopolysaccharides results in increased secretion of CCL4 protein]]	21913898
CCL4	Roflumilast	Indomethacin inhibits the reaction [Roflumilast inhibits the reaction [Lipopolysaccharides results in increased secretion of CCL4 protein]]	21913898
CCL4	Roflumilast	Roflumilast inhibits the reaction [Lipopolysaccharides results in increased secretion of CCL4 protein]	21913898
CCL4	roflumilast N-oxide	Dinoprostone promotes the reaction [roflumilast N-oxide inhibits the reaction [Lipopolysaccharides results in increased secretion of CCL4 protein]]	21913898
CCL4	roflumilast N-oxide	roflumilast N-oxide inhibits the reaction [Lipopolysaccharides results in increased secretion of CCL4 protein]	21913898
CCL4	SB 203580	SB 203580 affects the reaction [Methotrexate results in decreased expression of CCL4 protein]	19100307
CCL4	Silicon Dioxide	Silicon Dioxide analog results in increased expression of CCL4 mRNA	23806026
CCL4	Simvastatin	Mevalonic Acid inhibits the reaction [Simvastatin inhibits the reaction [IFNG results in increased expression of CCL4 mRNA]]	16321392
CCL4	Simvastatin	Mevalonic Acid inhibits the reaction [Simvastatin inhibits the reaction [TNF results in increased expression of CCL4 mRNA]]	16321392
CCL4	Simvastatin	Simvastatin inhibits the reaction [IFNG results in increased secretion of CCL4 mRNA]	16321392
CCL4	Simvastatin	Simvastatin inhibits the reaction [TNF results in increased secretion of CCL4 mRNA]	16321392
CCL4	sodium bichromate	sodium bichromate inhibits the reaction [[Ionomycin co-treated with Tetradecanoylphorbol Acetate] results in increased secretion of CCL4 protein]	17685462
CCL4	sodium bichromate	sodium bichromate results in decreased secretion of CCL4 protein	17685462
CCL4	2,6-Dichloroindophenol	[2,6-Dichloroindophenol co-treated with NQO1 protein polymorphism] results in increased expression of CCL4 mRNA	21034357
CCL4	Sodium Dodecyl Sulfate	Sodium Dodecyl Sulfate results in decreased expression of CCL4 mRNA	20713136
CCL4	Strophanthins	Strophanthins results in decreased expression of CCL4 protein	20116850
CCL4	tamibarotene	tamibarotene results in increased expression of CCL4 mRNA	15498508
CCL4	Tetradecanoylphorbol Acetate	[indirubin-3'-monoxime co-treated with Tetradecanoylphorbol Acetate] results in decreased expression of CCL4 mRNA	18958680
CCL4	Tetradecanoylphorbol Acetate	[Ionomycin co-treated with Tetradecanoylphorbol Acetate] results in increased secretion of CCL4 protein	17685462
CCL4	Tetradecanoylphorbol Acetate	sodium bichromate inhibits the reaction [[Ionomycin co-treated with Tetradecanoylphorbol Acetate] results in increased secretion of CCL4 protein]	17685462
CCL4	Tetradecanoylphorbol Acetate	[Tetradecanoylphorbol Acetate co-treated with Ionomycin] results in increased expression of CCL4 protein	17572062
CCL4	tigecycline	tigecycline inhibits the reaction [enterotoxin B, staphylococcal results in increased expression of CCL4 protein]	19874226
CCL4	tigecycline	tigecycline inhibits the reaction [enterotoxin F, Staphylococcal results in increased expression of CCL4 protein]	19874226
CCL4	titanium dioxide	titanium dioxide results in increased expression of CCL4 mRNA	19695317
CCL4	titanium dioxide	titanium dioxide results in increased secretion of CCL4 protein	20005940
CCL4	Tretinoin	[arsenic trioxide co-treated with Tretinoin] results in increased expression of CCL4 mRNA	19828696
CCL4	Tretinoin	Tretinoin results in increased expression of CCL4 mRNA	15498508|19828696
CCL4	Tretinoin	Tretinoin results in increased expression of CCL4 protein	19828696
CCL4	troglitazone	troglitazone results in decreased expression of CCL4 mRNA	19631733|20846491
CCL4	troglitazone	troglitazone results in increased expression of CCL4 mRNA	19631733
CCL4	usnic acid	[usnic acid co-treated with Lipopolysaccharides] results in increased expression of CCL4 mRNA	22777745
CCL4	Valproic Acid	[Hydralazine co-treated with Valproic Acid] results in increased expression of CCL4 mRNA	17183730
CCL4	Vincristine	Vincristine results in increased expression of CCL4 mRNA	23649840
CD14	15-deoxyprostaglandin J2	15-deoxyprostaglandin J2 results in increased expression of CD14 protein	12649303
CD14	1-nitropyrene	1-nitropyrene results in decreased expression of CD14 mRNA	19041380
CD14	2-(2-amino-3-methoxyphenyl)-4H-1-benzopyran-4-one	2-(2-amino-3-methoxyphenyl)-4H-1-benzopyran-4-one inhibits the reaction [Calcitriol results in increased expression of CD14 protein]	14729647
[truncated: 20,478 more rows]
